# Supplementary material for: Pan-cancer onco-signatures reveal a novel mitochondrial subtype of luminal breast cancer with specific regulators
Source: Springer Nature journal article supplement (doi:10.1186/s12967-023-03907-z), 2023-01-30

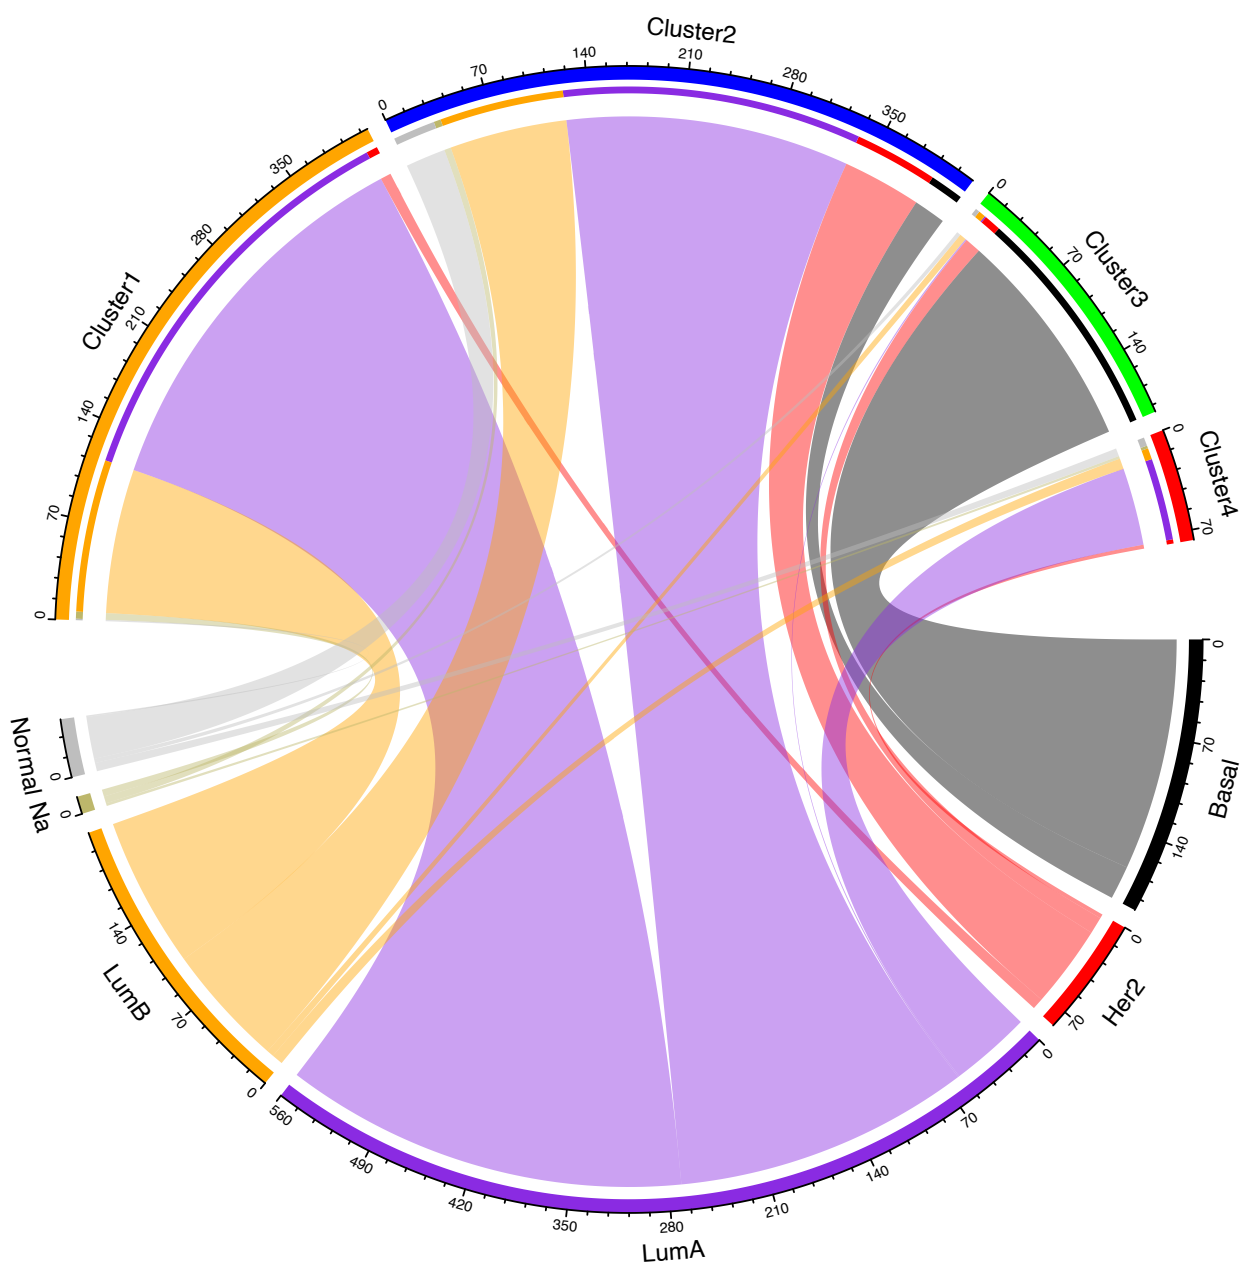

Supplement: MOESM2 [file 23968680]
