# Supplementary material for: Pan-cancer onco-signatures reveal a novel mitochondrial subtype of luminal breast cancer with specific regulators
Source: J Transl Med. 2023 Jan 30;21:55. doi: 10.1186/s12967-023-03907-z (PMC9885701; doi:10.1186/s12967-023-03907-z)
Supplement: Supplementary file 1 — Additional file 1: Table S1. List of the 105 derived onco-signatures. List of 105 onco-signatures used in the paper. [file 12967_2023_3907_MOESM1_ESM.xlsx]

## Sheet: 105_Signatures_V2
SigID	MutGene	N genes	GeneSymbol
Sig1	ABI1	11	FEM1A MLLT1 SGK1 SLC1A5 ZBTB34 ARF6 MBLAC2 PIAS4 TMEM33 ZBTB5 ZNF398
Sig2	ACSL3	13	SDHAF2 ARID1B BLOC1S1 NEDD8 NR2C2 SAC3D1 ZBTB8OS APOPT1 LENG1 MCTS1 NDUFAB1 NDUFB11 SUPV3L1
Sig3	AKT1	21	TMC4 KIAA1211L TC2N TSPAN13 CHSY1 HOOK2 C14orf79 EFCC1 KCNE4 PKIB PYGO2 SEC16A ANKMY1 ELMOD3 IPP LAGE3 LYPD6 NT5DC1 SCUBE2 SMYD3 ZNF429
Sig4	APC	14	PROSER1 GPALPP1 RNF114 PLCB4 SPATA2 TM9SF4 FRYL TP53RK DPM1 MOCS3 YAE1D1 FAM105A MUC12 STAU1
Sig5	ATF1	16	CHCHD6 EPB41L3 PINX1 9665 ATG13 CLSTN1 COMMD9 DBNDD1 FAM208A FMN1 KATNAL1 KIAA2022 LDB1 PARG PCDHB14 STXBP5
Sig6	ATRX	35	CSMD2 ELMO2 DOCK10 65018 FAM69A LLGL1 ADCY8 SIRT2 DCAKD EEPD1 ID4 MEIS3 LMTK3 NFIX P2RY12 PACS2 LUZP2 FBXO44 MPDZ ADD3 CALCRL CHST9 LIX1 643763 DAAM2 POMGNT2 STOX1 NR2F1 GABARAPL2 23637 C14orf132 HIPK2 LIX1L NUDT11 TMCC2
Sig7	AXIN1	68	CACFD1 FABP1 CASC10 NR5A2 ZFAND2A MKKS SLC38A3 ACOT1 AGXT APOA1 CD302 FGL1 GLT1D1 KNG1 SERPINA6 CEBPA DNPH1 FAM35A GOT1 HPX MPND MTHFS POLR3GL SERPINA1 A1BG ACOT2 ADH1A CLDN15 DGAT2 F10 FCGRT FTCD GLRX5 GPC3 HAL KHK LIPC NR0B2 NSUN6 ORM1 PCOLCE2 SLC27A3 SLC38A9 TM4SF5 TMEM86B TMPRSS6 TTC39C UPB1 AS3MT CREB3L3 CYP2D6 DDT DPYS ELOVL2 FRAT1 METTL7B OAF ORM2 PCK2 PHYH SERPINA7 SERPINF1 SPATA24 SPP2 S…
Sig8	BAP1	49	HADHA PLA2G4C RAB17 PCBD2 TRIM38 MMAA BICC1 CISD1 PDE6B SMTNL2 CDH6 DCDC2 DDB2 HADHB VLDLR AIG1 CLYBL CNPPD1 IAH1 LEPROT CDHR5 EPB41 LRRC19 MAP3K14 MPP6 PDE8A RAB24 BIVM HSPB8 NIT2 PKHD1 ZNF33B ACADM ALG5 MRPL23 SEPSECS SUFU ATM GATB MBD5 MLYCD NOX4 PTTG1IP ACADVL CCDC50 FAHD1 IL17RB TATDN3 TM7SF3
Sig9	BRAF	127	RXRG PDLIM4 DTX4 NAB2 SLC17A5 NOD1 10577 ANKS6 DOCK9 DUSP6 LPAR5 DAPK2 PDE5A AFAP1L2 PROS1 ARNTL DCSTAMP LCA5 LTBP3 PLEKHA4 DHRS3 SHROOM4 GABRB2 PTPRM KLHL2 MXRA8 ITGA9 ZDHHC2 ACVR1 DOCK3 TCERG1L MRPS6 RASA1 CTNNAL1 PLS3 TMEM98 C2orf40 SLC5A3 LMBRD1 RBMS2 ARMCX3 ZBED2 KIAA1217 SLC27A6 CST6 SNX22 XPC EPHA4 IKZF4 PRICKLE1 SGMS2 GRAMD3 LRP5L ZNF430 PDE1A LZTS2 SDC4 DUSP5 SGMS1 SYT12 TRIB1 COL8A1 CAD…
Sig10	CALR	14	POLG2 SLC38A10 148413 3992 ABHD15 BAZ1B CDPF1 DNLZ FDPS GPT2 ISOC2 MCL1 PSEN2 TMEM104
Sig11	CANT1	13	TAF1 SEPT11 ANKEF1 C6orf62 IPO13 MTERF3 MYH9 NUMBL PCDHB2 PRPS1 PTPN14 TBC1D31 ZNF470
Sig12	CASP8	7	IFIH1 CXCL10 DDX60 IFIT3 CXCL11 DDX60L KRTDAP
Sig13	CBFB	21	OAT FBXO28 IRX2 MYO6 TLR5 CASD1 CITED4 SLC1A1 APH1A MXRA5 SGK3 ACADSB BMI1 C11orf63 FBXL19-AS1 MED13L MFSD7 PHF20 RBBP5 STOM WBP1L
Sig14	CBL	5	PPIL2 TRIM24 ZNF624 FUS RANBP3
Sig15	CCDC6	6	9762 AP1M2 MLH3 PEPD PTGER4 RNF115
Sig16	CCNB1IP1	6	AQP5 KCNH3 PIGC PSMB5 RCOR2 TLR4
Sig17	CCND1	5	SURF2 MAPK12 SLIRP 1350 C1orf50
Sig18	CCND2	14	SIPA1L3 CGREF1 RRAS ACTN4 CAMTA2 COQ10B CXCL9 DNASE1L1 IQCG NPIPB5 PSMD8 RAB37 ST8SIA4 ZNF345
Sig19	CD79B	41	ATP2A3 CD72 FAM26F ICAM3 LIMD2 PPM1M S1PR4 TBC1D10C 22914 374443 ARHGAP19 ARHGDIB CD33 CFP CNTRL CORO7 CR1 DEPDC1B EBI3 ELL3 FCER1G FCGR1A FCGR1B HCST ITGAL LYL1 MS4A1 PIM2 PLEKHO1 PSTPIP1 PTPRCAP SASH3 SIT1 SLC7A6 TNFAIP8L2 TRAF3IP3 TRANK1 VNN2 ZBTB1 ZFAT ZNF101
Sig20	CDC73	5	58515 DGCR14 IKZF5 NDUFA1 TCEB2
Sig21	CDH1	42	ACKR1 CLMN TMEM119 NOSTRIN CYBRD1 DCN ITGB5 PDGFRB ZNF587 RCOR3 TXNIP CTGF SHROOM1 BMPR2 CSAD ADIPOQ CDKN1B CIDEC EVA1B ITGBL1 KIAA1429 KLHL12 NFIC SCGB2A2 TESMIN BTG2 CCDC74A CYP4X1 LMCD1 MATN3 PLIN1 ZNF740 GPR89A BAMBI COL15A1 IRX3 SNAP47 ZNF33A EGR3 PLIN4 SLC2A10 ZNF467
Sig22	CDK6	5	CNOT6L CNOT7 POLR2J2 TATDN2 YIPF2
Sig23	CIC	5	FGFBP3 LHFPL3 TRIM67 CA10 SMARCC2
Sig24	CNBP	64	SOCS7 CECR2 IL6R LRRC3 SLC41A2 SPAG5 UNC119 ZCCHC8 ZIK1 ACVR2B ADAMTSL2 ADH1C ALDH6A1 APBA1 ATP2B2 BAG3 BHLHB9 C19orf66 CACTIN CBS CEMIP COG3 CROCC DHTKD1 ERICH5 FAM222B FKBP5 FNIP2 HMGCS1 INTS2 JARID2 KATNB1 KBTBD7 KIAA0100 KLHL22 LAMC3 LSS MTF2 MTOR N4BP2 PALM2 PPP2R1B PPRC1 PRIMPOL PRPF3 QRICH2 QSER1 RAPGEF2 RFC1 RORC RPS25 RPS6KA6 RTN4RL2 SEMA4C SLC9B2 SMARCA1 SOCS1 SPTBN2 TPST2 TRMT1L WBP11 …
Sig25	CREB3L2	14	2564 PSMB1 C18orf8 C1orf112 GAA IFT20 IMPACT LIN7B MAGOHB MAL2 MTFR1 PPP2R3C RSL24D1 ZNF565
Sig26	CRLF2	13	SS18L1 FAXC POT1 STAT3 BTF3L4 CD274 DEF8 IFNLR1 MARCKSL1 MOSPD1 MTG2 VBP1 YTHDF1
Sig27	CTNNB1	71	ADCK3 AOX1 F5 GGH FAM8A1 STBD1 MTTP OCEL1 PC NUDT7 RABEPK ABCB4 DCXR RMDN2 SLC22A3 CES2 NAGS PAH ACSS3 BDH1 HGD HLF NUDT6 SOD1 ADHFE1 AKR1C4 ALDH4A1 AQP9 MMAB SEC16B ACAA1 BOK CRADD HAGH MRPL55 PKLR PRAP1 ECHDC3 HP HSDL2 HMGCL SLC26A1 SNTB1 SPPL2A ALDH1L1 C4BPA CYP2E1 TMEM56 CCL16 DMRTA1 HFE2 MTHFD1 NR1I3 PRODH2 UGT1A4 UGT2B4 C8A HAAO PQLC1 UGT1A1 ADH4 ALDH2 F11 GCDH HPD KLF15 SLC27A5 ASPSCR1 HYA…
Sig28	CXCR4	7	ZZZ3 CNOT3 HIVEP1 HP1BP3 SRSF11 ZCCHC3 TAS2R20
Sig29	CYLD	14	ETV6 IKBKE SERTAD2 MYO3A NLRP1 RELB INPP1 TNFAIP3 CDC42EP4 CUL9 KREMEN2 RNF165 TYK2 ZFAS1
Sig30	DDIT3	11	IL2RB STARD4 DYNLT3 FLT3LG GJA1 HFE MORC4 MOSPD2 SERTAD1 UHRF1BP1L VRK3
Sig31	DDX5	42	57551 ACTR3C ADAMTS9 AMN ANKRD26 B4GALT5 BCAR1 COA3 DNAL1 FAM21C GOT2 KLHL20 MSI2 NFE2L1 PLXNB1 PTPRD SERINC5 STK38 SUN1 TOMM70 TPP2 VPS4A WDR24 WDR48 ZNF250 ZNF318 ZNF501 ZNF704 ZNRF2 DNAJC30 AP1G1 CCDC57 FOXC1 ZFP90 9772 ADAMTS13 CRYAB DHX40 MEX3C PMS2 VPS9D1 WIPI2
Sig32	DNMT3A	6	CCDC9 GLUD1 SLC25A23 CANX GAS2L1 TLN2
Sig33	EGFR	78	10715 SLC1A3 NES DPYSL5 AQP4 SDC3 DTNA SCRN1 CST3 MSANTD4 FGF1 ITGA7 OLFM2 PON2 DPY19L3 GAP43 RDX RNF180 TSPAN3 IGDCC4 PTN TMEM106B 23302 CNR1 DSEL KCNIP1 SMAD1 DIRAS1 ERBIN GPR37 MFSD2A ZNF181 CNTNAP1 VPS41 KCTD7 MT3 PLPPR4 YKT6 SEMA6D SLC6A9 ZKSCAN5 ACYP2 AQP1 SBDS SEPW1 ABCD2 ARL4A C3orf70 TREM2 TSC22D4 TTYH3 VASH1 ZIC1 PSMG3-AS1 CHL1 CLDN5 EGFR MEGF10 SLITRK3 ZNF621 GTF2IRD2 ING3 LRRC34 PLA2G…
Sig34	EIF4A2	12	127428 ARSA CARD19 CD276 KTN1 MFSD1 RSRP1 SELPLG FAS NPEPPS TNFSF10 TPI1
Sig35	ELK4	7	SKA2 C5orf34 CEP83 EDN2 PPP2R5C TMEM186 WNT2
Sig36	EPAS1	5	HOXA7 C10orf88 FAM204A C1orf52 HDAC9
Sig37	EPS15	5	GOLGA6L9 HOXD10 MX2 ERMP1 RAD9A
Sig38	ETNK1	11	EIF1AD KLF10 ARIH2 D2HGDH MAF MAPK14 SLC11A2 TTC17 UNKL VWA1 ZNF451
Sig39	FCGR2B	16	PITRM1 DAG1 ITGAM B3GALT6 BAD FAM104A FAM118A FBN2 GPR137 KLHL5 NUP153 PRELP SOX12 TIPRL ZNF524 ZNF71
Sig40	FGFR2	5	LRRC59 DPH5 NAT9 RAB2B ZP3
Sig41	FGFR3	20	ZNF385A WDR72 PDE10A SLITRK6 PABPN1 PERM1 PPFIBP2 EOGT PRICKLE4 SLC14A1 SLC20A1 ZMYM2 LMBR1L ZNF662 EXOC7 MAP4K3 CLCA4 HOMEZ LPIN3 SYPL1
Sig42	FHIT	19	CDK11B ZNF175 GPATCH1 HELZ HSPA2 ZNF394 C19orf33 CCDC174 CCNK GALC KCNH1 LDLRAP1 LINC01128 PKNOX1 PLEKHM2 SETD4 TTC39B UBE3A USP36
Sig43	FOXA1	25	ACTL10 PEX7 HEATR5B L3MBTL3 MIPOL1 NME3 RNF103 TMEM57 EDEM3 ALCAM C1orf168 DLX1 HIST1H2AC PAIP2B PLD6 ZNF30 C11orf80 FBXW4 HIST2H2BE KIAA0368 KLHDC9 MTERF4 RPL13A TLK1 TMSB15A
Sig44	FUBP1	21	RBM4B USP54 HDAC4 MPP2 PSD2 RGMB SLC7A14 ASIC4 GRIA1 KCTD2 LRP4 SEZ6L TCF4 UNC80 AGPAT4 C22orf46 CACNA1A GPATCH11 IP6K1 PLXNB3 TMEM132B
Sig45	FUS	7	7469 ANKRD40 ARL4C C20orf96 GOLGA2P5 HARS SRGAP2
Sig46	GNA11	23	CHSY3 ABL1 CEMP1 MFF MPV17 NT5DC3 PHACTR1 BBS5 GRK3 HEXA IQCK ITGB1BP1 SLC45A2 TMEM55A TRAF6 KCNJ13 ATAD1 GNPTAB LZTS1 MYEF2 OSBPL1A RHOJ TUBA8
Sig47	GNAQ	15	GPR161 LONRF1 PIGP ADAL ACP5 CTSF MFSD12 TNFRSF14 TYR BTBD9 EIF3L LINC00847 VEGFB VPS51 ZC3H12C
Sig48	H3F3A	6	PDCD7 CHMP4A GABPA RNF10 RPL39L UTP6
Sig49	H3F3B	30	BLMH BRAF MAP3K4 MRPS9 PPIE 151195 AHCTF1 CBX1 CTSW CUL1 CUL7 FTSJ3 GID8 ILKAP MAFG-AS1 MATK MYCL MYO1F OSCAR PI4KAP1 PSMC1 SAP30BP SP6 SVBP TRMT10B USP34 YPEL5 ZFP82 ZNF416 ZNF641
Sig50	HEY1	6	EPS8 54963 A4GALT GALNT2 JADE2 NHLRC3
Sig51	HNRNPA2B1	6	MRPS21 EIF3B 55501 C16orf13 RPF2 TPD52L2
Sig52	HOXA11	6	PDZRN3 ERLEC1 LGR4 MLST8 SPCS2 YME1L1
Sig53	HRAS	58	TLE4 AMOTL1 PCSK2 PRPF40B ZNF154 BEX4 CTDSP1 GPRASP1 SNRPN ISCU STOML1 ARHGAP22 HDHD2 KRT222 SNURF ZFYVE28 BMP7 OAZ2 PLD3 RHBDD2 ZNF671 SLIT3 SPRYD7 CCDC92 FAM219B GALNT18 NDUFB8 NISCH TSR2 TUSC3 114928 C11orf45 CIRBP CREBL2 FBXL15 PARM1 ROR2 SCAPER TSPYL1 DDX24 MDFI NBEA NR1D2 P4HTM ZNF132 6710 BPGM COG1 DISP2 GRK4 LINC00294 MFSD6 PLEKHA3 ROBO2 SLC37A2 SPRYD3 STAT4 TOM1L2
Sig54	IDH1	8	GPM6A GRIA4 PAQR6 RHBDL3 SLC9A6 TNRC6C DPYSL3 SPARC
Sig55	IDH2	33	FGF12 RRAGB ZNF821 BRINP2 GAD1 PPP1R3F RUSC2 ADGRL1 AKAP11 BRMS1L C3orf18 FAM171A1 IGSF21 SMIM13 SOBP TSPYL4 ANKS1B ARHGEF9 ATL1 CEP68 CHRNB2 CRTC1 CRY2 DENND5B DLGAP1 DZIP3 GABRB3 GNPDA2 KCNQ2 KPNA5 NYAP1 PHLPP2 ZFP1
Sig56	IL6ST	5	CLPB FAM185A NRBF2 RPP25L TMEM53
Sig57	KDM6A	9	UPK1B CROT UGT1A10 AHR TBX2 UPK1A UPK2 RBBP8NL SPTSSB
Sig58	KEAP1	14	UGDH MGST1 SCNN1A OPN3 RPH3AL AGA ODC1 PDE4D PMM1 FURIN TDP2 VAPA GRAMD1A RASD1
Sig59	KIT	26	RNF216 POLRMT RNF214 DDHD1 DDX43 DDX6 RNF31 CENPA ACTR3B AKIRIN2 MIIP NCKAP5L VSIG10 CNNM3 DCAF4 EDC3 FAM221A GIGYF1 GJC1 LINC00174 MSH6 PFAS TYW1 ZC3H14 ZGRF1 ZNF766
Sig60	KRAS	7	TESC CAPN9 PRSS3 TBXAS1 CMTM1 SLC26A9 CLDN10
Sig61	LCK	8	ZNF518A APBA3 FBXL4 NEDD4 PARS2 TMEM14A ZBTB3 ZNF551
Sig62	MAP3K1	36	PGR SFXN2 STC2 FLNB 55718 CRAMP1 LCMT1 FNIP1 SRCAP ZNF646 FBRS TMEM26 ZNF768 LDLRAD3 USP7 ZNF92 FAM198A ROGDI WWP1 ERCC4 HRASLS5 PRRT3 RRN3 SLC35E2B CCDC66 HDAC11 RERG SLC38A1 ZNF24 ZNF497 CPNE3 E4F1 FIG4 NKAIN1 TCEAL4 ZNF251
Sig63	MEN1	9	TMEM263 CDK20 NFATC4 AMZ2 ATP5B GHITM GPN3 MZF1 ZNF415
Sig64	MET	23	DCBLD2 PRKAB1 CNKSR3 C17orf97 EMX2OS MYOM3 TCTN2 1039 LAMB1 PLA2G16 ZNF385B BTBD7 CREB5 FIBIN CYTH2 DZANK1 EVC GALNT11 ITGB8 KCP PKP4 PROM1 TCTN1
Sig65	MYD88	22	AKNA ARHGAP25 C16orf86 CYBB LAT2 LCP1 NCKAP1L NUBP1 STK4 TICAM2 CCDC69 DUT FCRL5 IKZF1 NECAP2 NFKB1 PDCD1 POU2AF1 RABGAP1L VAV1 ERICH1 FMNL1
Sig66	NF1	9	SIRPB2 SLC4A8 GNG2 CYFIP1 SPRED2 BRSK1 DCTN1 MAP3K12 RLIM
Sig67	NF2	58	AMOTL2 PLK2 FSTL3 AXL DOCK11 EFEMP2 MARVELD1 BDNF BMP1 C1R PROSER2 WNT2B CDH11 EFEMP1 GPX8 IL18 MOCOS OLFML1 AVEN CD200 LATS2 LRRN4 MEGF6 NEK7 ROR1 TBC1D2B ARHGEF10 BDKRB1 C10orf54 COBLL1 LACTB SLC12A8 TEAD1 ADAMTS3 EXT2 KLHL29 LETM2 NPR1 PGM1 SLC15A3 UBE2E2 1613 7869 ADAMTS10 AP3S1 CALB2 DENND1A ERCC5 FLRT2 MAP3K8 MEIS2 MICAL2 SERPINE1 ST7L TFE3 TNS3 USP40 ZFPM2
Sig68	NFE2L2	25	RBM19 SLCO3A1 ABCC5 NOTCH3 GBP6 GLI2 SLC35G1 DTD2 NXPE3 ATP11B GSTM3 NAV1 TMEM116 ACAP2 C3orf58 FBXO30 HK1 UGT1A7 ACTL6A FXR1 MDGA1 TSEN15 TSKU FREM2 GNA13
Sig69	NPM1	17	DNAJB1 FABP5 FOLR1 KCNK5 MAP6D1 MFSD4A MTUS1 PDE4A SCEL SERPINB4 SLC6A14 SMURF2 STEAP3 STIM2 STK17B TOMM20 ZNF532
Sig70	NRAS	104	MMP15 ST6GALNAC3 METTL7A PRDX5 FAM155B TPMT ST3GAL1 C16orf89 ST6GAL2 VAMP1 DUOX2 GNA14 KIAA1456 LIPG MARVELD2 EIF2B2 SLC25A29 TMEM115 ZBTB2 ZMYND11 ADCY9 ALDH9A1 B9D1 MPG PBX3 PDE8B TRIM58 UST ZC2HC1C 55846 ATAD3C B3GNT9 BORCS7 CLN5 CMTM4 INPP5J RILPL2 SLC25A38 TMEM50B ZNF76 ISM1 PRKCQ RILP SEC63 SERGEF ABHD14B ANKAR EPOR GPX3 MTCH1 SPATA7 DUOXA2 FAM227B KCNC3 LRRK2 MINA PBXIP1 PEBP1 UBXN6 CCDC28…
Sig71	PAFAH1B2	7	RPS4X ANAPC15 CCDC189 RANGRF THOC1 TMEM219 TRAPPC2
Sig72	PBRM1	25	SLC22A11 P3H2 SLC17A3 APLN KANK3 TLL1 ACAA2 PDGFD WWTR1 TCEA3 SETD3 SMIM24 PPM1F TMEM38B ZNF611 NETO2 TRHDE AKAP2 MTR MYO9A PODXL CLDN2 MGAM CMBL NPR3
Sig73	PBX1	9	ACP2 ALPK3 METTL14 NINL WASH5P ZNF408 ZRSR2 ARFGAP1 HDDC3
Sig74	PDCD1LG2	6	BBS1 DNAAF2 KLHDC2 PREB SMAD7 ZNF224
Sig75	PHOX2B	5	CAPRIN1 COG5 MOB3A NSUN5 RPAP3
Sig76	PIK3R1	5	TROVE2 TMEM206 C14orf37 MYCBP PIK3R1
Sig77	PIM1	14	AIP ANKRD13A BCL2A1 CCDC61 CYTH1 LILRB4 MCM7 PPP1R9B SNHG3 CYB561A3 LYSMD2 PPAN RRP7BP ST3GAL2
Sig78	POU2AF1	32	ASPHD1 FAM173A LACTB2 MRPS28 NFAT5 RAB43 ABHD6 ARHGAP39 ATF2 ATP6V0B BIRC3 CDIPT COMMD5 COX7B DIS3L EID2B GDA GIMAP2 IL32 LY6E RABAC1 RGS14 RPS15A SLC22A18 TFPI2 TNFRSF11B TNFSF13B TRAPPC2L VAMP5 ZDHHC24 ZNF333 ZNF449
Sig79	POU5F1	11	MTRF1L CFDP1 COPS9 EMG1 FANCF KLHL36 RPS27 TLR6 TRAPPC6A TTC7A ZNF830
Sig80	PPARG	24	ACIN1 ARL16 LPAR2 MAN1C1 MBTPS1 MRPL27 QTRT1 THUMPD3-AS1 TSEN2 TWSG1 UGGT2 VCPKMT WDR27 XRCC1 ZCCHC7 ZNF700 283970 KIFC2 TAF1C ZNF195 CLASRP GLT8D1 STXBP2 TRMT13
Sig81	PPP6C	20	ARHGEF11 TSN B4GALT6 FNTB MORF4L1 MUL1 SIRPA 27065 ABL2 ALDH1B1 ESYT1 FAM133A HIBCH KIAA1549L LEF1 LRPAP1 NCK2 TTLL4 TUBGCP5 ZC3H7A
Sig82	PRKACA	26	PTPRK 6158 POLD3 VTI1B ACTN1 ATP5J C17orf89 CHCHD10 COL4A5 ENPP5 FN3K HIKESHI HRH1 KIAA1671 KIF13B MRPS10 NCOA2 PPIL3 RALGAPA2 RPS29 SETD7 TMEM160 TTC37 UBE2J1 UXT XDH
Sig83	PRKAR1A	26	AACS ATG10 HDAC8 MLF2 NAPA NDUFC1 ORC5 POC5 PRKCSH RAD17 RBBP7 RNF216P1 SEMA7A SPR ULK3 WDR61 ZBTB40 WHRN ATP6V0D1 COX17 DMAP1 HMGCR RHEB RNF14 TUBB4A UBE2B
Sig84	PTEN	17	RIBC1 MORN2 SPA17 STK36 IFT22 RSPH1 SPATA17 SAP30 AP4M1 CCDC173 DNAJC10 FOXJ1 FBXW9 PIFO ZMYND10 MBD3 NEK11
Sig85	PTK6	6	SP4 NF1 PDP2 SLC25A40 TCFL5 TIMM10B
Sig86	QKI	5	CCL28 CDK13 NECTIN3 TNRC18 PARD3B
Sig87	RABEP1	15	ARV1 BAG2 ERMARD GDF11 HIST1H4H INAFM1 LTBP1 METTL13 SAMHD1 THBS1 SESTD1 COPZ2 GLIS3 NUDT2 XYLT1
Sig88	RAC1	16	DMKN HBEGF LCE3D NDEL1 NOCT SPRR2F SPRR2G STAT2 MAST4 METRNL UPP1 CNFN CRCT1 DCUN1D3 SPRR2E ZNF426
Sig89	RB1	15	USP1 CDKN2C HAUS5 BRIP1 CASP8AP2 FANCL CENPF KNTC1 NUSAP1 POLA1 RANBP9 VPS45 BARD1 CCP110 CCNE2
Sig90	RBM10	8	GCA TLR2 ATP11A MR1 MTRR SCNN1B DRAM1 SNX30
Sig91	RHOA	6	RBM41 CHP2 GCNT4 CAMK2N1 IGFL1 PTK2
Sig92	RHOH	48	KDF1 SLC2A8 TMEM167A DDX51 IPO11 MAF1 MRPS16 PMS1 SNX7 THOC5 AHDC1 ARL5A ATG16L1 ATP5S BORCS8 C14orf119 CCNY CDAN1 CHD7 CHRNA5 DIMT1 DRG2 EPB41L5 FAM193A FBXO11 FSTL4 MIF4GD NEURL1B NFKBIA OGFOD3 PHIP PSMA6 PTCD1 RICTOR RNF220 SZT2 TPGS2 TXNDC9 UBP1 ZNF16 ZNF17 ZNF18 ZNF271P ZNF420 ZNF592 ZNF74 ZNF773 ZNF93
Sig93	SF3B1	38	CRYZL1 LRRC27 ST13 CHKB UBXN1 EIF2D FMO4 RPL31 RPP40 TTLL1 CCS GPR153 PPWD1 C11orf1 CEPT1 FAM114A2 GLTSCR2 MARK4 MRPL2 PEX6 SMC6 TMEM185A TOMM7 54512 85001 EIF3F EPM2A FAM86C2P NRDE2 POLL RPL10 RPL22 SFXN4 THAP7-AS1 THNSL2 TIGD2 UCK1 UFSP2
Sig94	SFPQ	12	IDH2 SYT17 THAP1 BAHCC1 CXCL1 EMX1 IDO1 KIAA1143 PRPF18 RPS5 SLFN13 WDR20
Sig95	SIX1	11	ALKBH5 FPGT LIPT1 SKIV2L2 ZBTB26 IFIT5 JDP2 MMP3 RBM12B SLC5A6 ZNF445
Sig96	SPOP	78	HOXA11-AS RABEP2 TRPM8 ALDH1A3 SIM2 ARHGAP6 ACPP ENDOD1 BBS4 CAMK1 CHRM1 FAM111A TRIM68 ACAD8 TMPRSS2 ZNF350 NCAPD3 SLC4A4 TM9SF3 10954 ANO7 LRP3 TSPAN1 PLPP1 PRAC1 RCAN3 TMEFF2 FAM13C FBXO25 HERC3 KAZALD1 LRRC26 MALT1 METTL3 MYBPC1 OR51E2 PPM1A PTRHD1 SLC9A3R2 TBPL1 ZNF542P AADAT GK5 GNMT GTF3C1 ADRB2 ATP6V1G1 AUH MON1B PART1 TMEM220 CENPN CUX2 ELL2 HIST1H2AE PCAT18 ZBTB10 ZNF652 CTBS LIFR PPM1K…
Sig97	SUZ12	5	84440 COL6A2 NXPH4 P3H4 BST1
Sig98	TCL1A	37	LAPTM4B NEMP2 NUAK2 PRRC2B SECISBP2 SEMA3A 100129550 654434 ALKBH8 BMF C9orf78 CD9 CLDN1 EMC2 F3 FLVCR1 GIT1 IRF2BPL MED30 MMP9 NCKAP5 NUPL2 PCSK5 PLEKHG2 PTGS2 PTP4A3 RABL2A SEMA4A SFR1 SLC39A4 SMAD4 SNORA8 STAU2 TSPYL5 WNK1 ZNF496 ZSWIM4
Sig99	TERT	16	ATP6V1E1 WIPI1 ABCA1 C5orf42 CCDC90B MFAP3L PPFIBP1 SNX17 ZMAT3 CDKN1A EIF2B1 GPR107 LGALSL PCDHB16 VKORC1 WDR60
Sig100	TMPRSS2	5	COMMD6 EIF2B3 JAGN1 TRAPPC5 SMIM20
Sig101	TNFAIP3	6	CD300LF ABCA7 HPRT1 LCP2 RNF34 SLAMF7
Sig102	TP53	17	PRKDC HSP90AB1 MTBP YBX1 AURKA KPNA3 PRR11 ASCC1 CHRAC1 OTUB1 TAF2 NCOA6 SMURF1 PIK3CA UBE2V2 CSNK2A1 TMEM65
Sig103	VHL	5	ARHGEF17 FGD5 CYP2J2 GIMAP5 HMOX1
Sig104	WIF1	14	ABCA5 COPS2 DAP3 DCAF8 FAM225B IKBKG NID1 NPR2 ORC3 PHAX PIAS2 SMAD2 SQSTM1 80222
Sig105	ZRSR2	22	S1PR2 TMEM234 7094 ALPP BRD8 C4orf3 C5orf24 CCDC96 CPTP DAP DHCR7 DRAP1 IMMP1L MED11 MEIS1 NDUFA8 RBM42 RGS10 TOMM34 TOX4 TPPP3 TTC1
