# Supplementary material for: Pan-cancer onco-signatures reveal a novel mitochondrial subtype of luminal breast cancer with specific regulators
Source: J Transl Med. 2023 Jan 30;21:55. doi: 10.1186/s12967-023-03907-z (PMC9885701; doi:10.1186/s12967-023-03907-z)
Supplement: Supplementary file 3 — Additional file 3: Table S2. List of Differentially Expressed Genes (DEGs): Cluster 4 vs Cluster 2. List of genes exhibiting significant differential expression between Cluster 4 and Cluster 2. [file 12967_2023_3907_MOESM3_ESM.xlsx]

## Sheet: DEGsCluster4vsCluster2
Gene Symbol	logFC	logCPM	PValue	FDR	Expression status
UCN3	7.04854	-1.68014	0	0	Up
CHGB	6.03125	4.37344	0	0	Up
CARTPT	5.95266	3.26092	0	0	Up
BCHE	4.9316	4.64247	0	0	Up
TSIX	4.7927	5.80604	0	0	Up
GPM6A	4.15669	3.07299	7.65422e-301	1.83102e-297	Up
CHRNA9	4.02888	1.72629	2.67815e-280	5.49136e-277	Up
GRIA1	3.88129	0.0815467	8.38309e-253	1.33692e-249	Up
NTS	3.84369	2.34603	9.64517e-256	1.73046e-252	Up
CGA	3.53321	4.60973	2.94175e-216	4.22229e-213	Up
PEBP4	3.26233	1.42825	2.04255e-180	2.44306e-177	Up
KRT1	3.19457	0.459355	5.59851e-170	5.73967e-167	Up
BPIFB2	3.10247	4.44532	1.68532e-164	1.61263e-161	Up
SCGN	2.94939	0.141384	2.28594e-142	1.93001e-139	Up
PCP2	2.91442	1.16769	1.32576e-141	1.05714e-138	Up
TBC1D3C	2.89736	1.1236	9.24586e-140	6.98452e-137	Up
HDC	2.84336	2.3745	8.28887e-136	5.94851e-133	Up
NACA2	2.78876	1.81405	8.51374e-130	5.55444e-127	Up
CSMD3	2.71973	0.0714282	1.61204e-119	1.00599e-116	Up
BPIFA1	2.68686	-1.59927	6.73466e-106	3.33319e-103	Up
PART1	2.67453	1.23244	5.52751e-118	3.30568e-115	Up
KRT81	2.54706	4.254	5.35452e-108	2.74476e-105	Up
C2orf82	2.50447	-1.38914	6.67859e-93	2.52257e-90	Up
SPAG6	2.43059	2.89863	2.27493e-97	9.60353e-95	Up
BPIFB1	2.42762	5.75568	1.35613e-97	5.89834e-95	Up
C4BPA	2.41211	-1.3392	4.39291e-86	1.28676e-83	Up
MAPK4	2.39652	-0.214304	2.36767e-90	8.49579e-88	Up
DYNLRB2	2.3927	0.72555	2.89797e-92	1.06653e-89	Up
NPY2R	2.34435	1.01978	9.40118e-89	3.21274e-86	Up
SMIM4	2.28801	2.90969	1.43644e-85	4.12344e-83	Up
KRT86	2.27664	1.94303	3.3221e-84	9.16964e-82	Up
CRYM	2.27007	2.28542	6.95393e-84	1.8832e-81	Up
CA14	2.21507	0.860507	1.97412e-78	4.80246e-76	Up
C12orf60	2.20866	0.555862	1.64368e-77	3.8675e-75	Up
AQP5	2.18686	2.28777	1.849e-77	4.28043e-75	Up
CYP4F35P	2.18656	1.78414	3.73485e-77	8.37598e-75	Up
DLX1	2.18566	1.30063	1.05154e-76	2.28678e-74	Up
TFF3	2.18408	8.45837	6.45251e-78	1.54355e-75	Up
SCGB3A1	2.18047	3.37057	2.47225e-77	5.63242e-75	Up
SPDYC	2.17866	1.81651	1.39629e-76	2.99118e-74	Up
PRSS33	2.17401	-4.00173	1.87324e-30	4.57256e-29	Up
CDHR3	2.15574	2.44473	3.39121e-75	6.95344e-73	Up
AMBP	2.14477	1.25748	1.22334e-73	2.43869e-71	Up
PTPRQ	2.13972	1.04524	4.61739e-73	8.83646e-71	Up
SLC27A2	2.13888	4.41969	2.21441e-74	4.47653e-72	Up
DOC2A	2.1207	1.39612	5.21299e-72	9.71715e-70	Up
CD52	2.10639	5.5366	4.51035e-72	8.51804e-70	Up
MST1	2.06213	1.73331	4.48953e-68	7.1598e-66	Up
DIRAS3	2.06046	2.28572	3.09524e-68	4.99169e-66	Up
FAM228B	2.04129	1.83473	1.11498e-66	1.70248e-64	Up
SNHG8	2.03887	5.36593	3.06413e-67	4.76965e-65	Up
OLFM4	2.0299	5.77069	1.24784e-66	1.88529e-64	Up
PLAC1	2.02391	0.612873	1.95568e-64	2.7792e-62	Up
ATP8B5P	2.01806	0.870681	2.44884e-64	3.44591e-62	Up
C4orf48	2.01568	1.84843	6.3616e-65	9.31714e-63	Up
C20orf85	2.01043	0.375228	3.31995e-63	4.33193e-61	Up
CCDC65	2.00904	0.512249	2.63872e-63	3.47463e-61	Up
TCTEX1D2	2.00684	2.79437	1.09442e-64	1.57082e-62	Up
TSNAXIP1	2.0068	0.990599	1.06875e-63	1.42035e-61	Up
CACNA1F	2.00009	0.276039	2.27483e-62	2.81471e-60	Up
GRIA2	1.99712	4.34875	2.77881e-64	3.87226e-62	Up
OBP2B	1.99465	2.98273	6.63866e-64	8.98913e-62	Up
SPA17	1.97462	2.7396	1.72616e-62	2.1733e-60	Up
TFF1	1.97352	8.06207	8.38967e-63	1.06564e-60	Up
TBC1D3B	1.971	2.95308	2.66467e-62	3.26889e-60	Up
H2AFJ	1.9687	7.60365	1.78668e-62	2.22993e-60	Up
DUSP15	1.96851	1.41144	1.7481e-61	2.07359e-59	Up
SPATA6L	1.96783	0.92914	4.78962e-61	5.45598e-59	Up
MT1A	1.96749	1.02099	4.14509e-61	4.75956e-59	Up
TGM4	1.96353	1.72216	2.40534e-61	2.82982e-59	Up
SYNC	1.95859	4.46076	1.08411e-61	1.29669e-59	Up
542767	1.9526	1.29486	2.35782e-60	2.60321e-58	Up
RLN2	1.92981	1.25055	7.68507e-59	8.29351e-57	Up
COX17	1.92563	5.12876	1.47904e-59	1.62051e-57	Up
SLIRP	1.92471	5.16218	1.69371e-59	1.84165e-57	Up
PCSK1	1.92421	1.17833	2.00072e-58	2.11149e-56	Up
SMCO3	1.91991	1.74891	1.64331e-58	1.76018e-56	Up
DICER1-AS1	1.90725	1.43424	1.61043e-57	1.62778e-55	Up
CITED1	1.90508	1.872	1.28138e-57	1.30437e-55	Up
ASPHD1	1.90295	1.10019	5.21097e-57	5.15814e-55	Up
BRICD5	1.9007	0.229559	6.32515e-56	5.81954e-54	Up
NPIPB4	1.90028	5.3412	6.40058e-58	6.60917e-56	Up
UGT2B11	1.89891	6.1536	7.39266e-58	7.57906e-56	Up
PIP	1.89242	8.34025	1.81695e-57	1.82368e-55	Up
VTN	1.89239	0.362364	1.366e-55	1.24881e-53	Up
CCDC151	1.88834	0.304539	2.90004e-55	2.58536e-53	Up
NDUFAF2	1.88793	2.67643	8.26108e-57	8.06608e-55	Up
TTC36	1.88621	1.95677	1.86032e-56	1.74517e-54	Up
SULT1A2	1.8808	0.965918	1.65147e-55	1.50022e-53	Up
7979	1.87797	6.60459	1.58353e-56	1.50519e-54	Up
ENO3	1.8623	1.54972	9.24033e-55	8.08698e-53	Up
RPL9	1.86024	7.16106	2.05178e-55	1.85091e-53	Up
PHGR1	1.85906	0.806677	5.04025e-54	4.30611e-52	Up
FAM186A	1.85877	0.378079	1.5095e-53	1.25965e-51	Up
RPL34	1.84891	9.34146	1.02131e-54	8.88415e-53	Up
NPAS1	1.8462	0.408958	7.97985e-53	6.32789e-51	Up
CSN2	1.84561	-3.46115	4.58835e-32	1.25921e-30	Up
SNHG3	1.8408	1.46099	2.18501e-53	1.80238e-51	Up
METRN	1.83156	5.88942	1.32083e-53	1.11517e-51	Up
CHST8	1.82435	3.70923	4.98232e-53	4.01748e-51	Up
DNAJC1	1.82276	6.99499	4.37797e-53	3.55012e-51	Up
TUBA3E	1.81262	1.5565	9.86992e-52	7.57556e-50	Up
SNHG12	1.81137	2.99931	3.94459e-52	3.1108e-50	Up
C11orf1	1.80898	3.69014	4.32592e-52	3.37445e-50	Up
TNFSF12-TNFSF13	1.80893	2.94944	5.66743e-52	4.39701e-50	Up
CARD16	1.80806	2.96735	6.35054e-52	4.9005e-50	Up
FAM181B	1.80313	1.02806	7.77323e-51	5.81089e-49	Up
ZPLD1	1.80112	0.642171	2.16745e-50	1.59535e-48	Up
CFAP53	1.79684	0.969948	2.02397e-50	1.49742e-48	Up
PAQR6	1.79642	2.10345	5.37463e-51	4.03885e-49	Up
GAS5	1.79321	6.76587	2.75021e-51	2.08856e-49	Up
CAPSL	1.79266	0.685139	6.18941e-50	4.4867e-48	Up
DYDC2	1.78975	0.191102	3.19781e-49	2.23893e-47	Up
C1orf54	1.77787	2.55147	5.00117e-50	3.66234e-48	Up
SAMD13	1.77282	1.43023	2.62073e-49	1.84389e-47	Up
TXNDC17	1.76651	5.31795	1.15844e-49	8.35531e-48	Up
WFDC2	1.76508	6.47302	1.31625e-49	9.39905e-48	Up
ABCA17P	1.76301	0.163756	1.17569e-47	7.84867e-46	Up
TRIM67	1.76124	0.0137028	2.36117e-47	1.54045e-45	Up
SMR3B	1.75769	-0.646349	5.61856e-46	3.476e-44	Up
84833	1.75614	5.39555	4.69246e-49	3.25367e-47	Up
389033	1.74735	0.74687	2.24106e-47	1.46877e-45	Up
MMEL1	1.7451	0.502446	5.03028e-47	3.2232e-45	Up
HSBP1L1	1.74273	3.29345	4.09805e-48	2.81432e-46	Up
CNFN	1.74214	1.79505	1.05692e-47	7.08877e-46	Up
PEX11G	1.73698	2.11935	1.59551e-47	1.05531e-45	Up
CYP2C8	1.73429	1.02567	7.58361e-47	4.81627e-45	Up
AGR3	1.73422	8.02171	8.06729e-48	5.46178e-46	Up
CMC1	1.73304	2.64138	1.94321e-47	1.2794e-45	Up
DNASE1L2	1.7321	0.33497	4.02993e-46	2.50396e-44	Up
HSD17B7P2	1.73147	1.45435	6.12558e-47	3.90758e-45	Up
MSMB	1.72551	5.78457	2.73622e-47	1.77706e-45	Up
MT1G	1.72549	3.04963	4.38436e-47	2.82192e-45	Up
CCDC189	1.7239	2.12979	8.82742e-47	5.5815e-45	Up
SNRPF	1.72319	5.56955	3.76364e-47	2.43331e-45	Up
DNAAF1	1.72165	1.5251	2.0356e-46	1.2703e-44	Up
C10orf107	1.71243	1.20024	9.96061e-46	6.0836e-44	Up
TMPRSS6	1.70496	2.86648	6.89819e-46	4.24934e-44	Up
HHLA3	1.70167	2.81359	1.0794e-45	6.53697e-44	Up
CSN1S1	1.70109	-2.2598	7.34936e-37	2.83563e-35	Up
S100A1	1.69858	5.22838	9.66051e-46	5.92553e-44	Up
6349	1.69437	1.61443	6.2229e-45	3.70611e-43	Up
A1BG	1.69415	3.12962	2.51954e-45	1.51945e-43	Up
RPL39	1.68859	4.92968	3.60499e-45	2.16496e-43	Up
PAM16	1.68586	3.40375	6.7046e-45	3.97649e-43	Up
GPC3	1.68264	4.85724	7.80014e-45	4.60722e-43	Up
PPP1R14A	1.68103	0.44296	1.97287e-43	1.13721e-41	Up
NUPR2	1.67435	2.30186	4.6286e-44	2.6788e-42	Up
NFE2	1.6673	0.480615	9.92884e-43	5.54508e-41	Up
RPL13AP20	1.66285	0.950063	7.42815e-43	4.18103e-41	Up
RGN	1.6598	0.819346	1.32965e-42	7.3402e-41	Up
TEKT3	1.65303	0.6024	4.47358e-42	2.36064e-40	Up
SYT8	1.65254	1.36789	1.5418e-42	8.41422e-41	Up
NAA38	1.6516	4.79404	4.01577e-43	2.29635e-41	Up
RPL22L1	1.64274	4.87352	1.20536e-42	6.67974e-41	Up
GOLT1A	1.64184	2.92965	2.00959e-42	1.08844e-40	Up
C1orf56	1.63843	3.82151	2.39335e-42	1.29142e-40	Up
C12orf45	1.63689	3.12114	3.46655e-42	1.84279e-40	Up
DNAJC12	1.63559	6.22896	2.69075e-42	1.44645e-40	Up
NDUFB6	1.63507	5.74531	2.93336e-42	1.56515e-40	Up
CACNB2	1.63155	0.934281	3.49482e-41	1.76004e-39	Up
NT5M	1.62654	1.98578	2.15526e-41	1.10876e-39	Up
C1orf53	1.62368	1.30123	5.64372e-41	2.78365e-39	Up
GJC3	1.62358	0.627021	1.50189e-40	7.23375e-39	Up
SCNN1D	1.62335	1.86812	3.46617e-41	1.75176e-39	Up
MORN2	1.62143	4.52062	1.74213e-41	9.02702e-40	Up
ST20	1.62134	2.01156	3.98793e-41	1.98746e-39	Up
IGFALS	1.62054	2.31819	3.63573e-41	1.8246e-39	Up
RHBDL1	1.61696	2.4466	5.24878e-41	2.59778e-39	Up
DRC3	1.61195	2.55736	9.1249e-41	4.45475e-39	Up
NDUFAF5	1.60903	2.42154	1.38721e-40	6.72656e-39	Up
CHADL	1.60891	2.05204	1.74491e-40	8.37614e-39	Up
CENPW	1.60878	2.36018	1.47745e-40	7.14003e-39	Up
MZT2B	1.60798	7.02843	7.80159e-41	3.8348e-39	Up
AGAP6	1.6059	1.89154	2.79942e-40	1.32171e-38	Up
CENPP	1.60436	3.1334	1.83406e-40	8.77476e-39	Up
AMY2A	1.60262	-0.846201	1.54478e-37	6.2811e-36	Up
CAPN8	1.6019	4.5324	1.87239e-40	8.9284e-39	Up
NDUFA1	1.60018	6.40425	2.04031e-40	9.69689e-39	Up
COX7A1	1.59997	2.97476	3.2756e-40	1.53643e-38	Up
TNFRSF18	1.59997	3.45287	2.8499e-40	1.34113e-38	Up
ACYP1	1.59764	1.89881	7.47986e-40	3.47438e-38	Up
WNT11	1.59665	2.76992	5.25936e-40	2.45089e-38	Up
1350	1.59369	7.85422	4.33434e-40	2.02641e-38	Up
NOXA1	1.58754	3.36835	1.2904e-39	5.89844e-38	Up
WDR93	1.58349	0.720424	1.44657e-38	6.31084e-37	Up
SFXN4	1.58322	4.42414	1.78244e-39	8.09599e-38	Up
PKIB	1.58112	5.69125	2.06495e-39	9.3496e-38	Up
6023	1.57947	0.847386	1.90371e-38	8.25495e-37	Up
SPEF1	1.57918	1.79755	7.16382e-39	3.15406e-37	Up
KLHDC9	1.57907	3.46612	3.44729e-39	1.54622e-37	Up
MORN3	1.57558	0.149022	1.09079e-37	4.4989e-36	Up
SGCG	1.57088	1.02501	4.04389e-38	1.71722e-36	Up
CCDC58	1.57043	3.03642	1.07465e-38	4.70256e-37	Up
TCEAL5	1.57041	0.750704	6.261e-38	2.60476e-36	Up
FKBP3	1.57032	6.94284	7.12222e-39	3.14777e-37	Up
CA11	1.56514	2.81179	2.15771e-38	9.32821e-37	Up
NOSTRIN	1.56445	4.88808	1.5639e-38	6.80203e-37	Up
PHOSPHO2	1.56098	1.94791	5.38944e-38	2.26183e-36	Up
ZNF688	1.55991	3.49307	3.26077e-38	1.40125e-36	Up
SPATA4	1.55916	0.421435	3.97227e-37	1.56632e-35	Up
FANK1	1.55839	3.13185	4.27576e-38	1.81032e-36	Up
APOPT1	1.55825	4.48264	3.36858e-38	1.44326e-36	Up
SNRPE	1.55646	6.24013	3.69782e-38	1.57492e-36	Up
MRPS21	1.55488	5.93543	4.49927e-38	1.89935e-36	Up
GATA3-AS1	1.55365	4.05963	6.08705e-38	2.53975e-36	Up
CLUL1	1.5534	1.75324	1.48515e-37	6.05576e-36	Up
RSPH1	1.5533	3.26491	7.44733e-38	3.08935e-36	Up
SEC61G	1.55325	6.01739	5.41981e-38	2.26795e-36	Up
MBLAC1	1.54743	0.905563	6.93613e-37	2.69066e-35	Up
ANXA2R	1.54687	1.34903	4.4444e-37	1.74291e-35	Up
RBKS	1.54494	2.66252	2.38016e-37	9.51599e-36	Up
HEXIM2	1.54492	2.95799	2.14627e-37	8.62896e-36	Up
NUDT6	1.54263	2.00317	4.31173e-37	1.69552e-35	Up
PCAT18	1.54223	3.07688	2.82211e-37	1.12204e-35	Up
UQCC3	1.54156	4.2484	2.40498e-37	9.58853e-36	Up
MDH1B	1.54118	0.482225	2.69558e-36	1.01548e-34	Up
ZGLP1	1.5391	0.338458	4.44632e-36	1.6448e-34	Up
ZSWIM7	1.53858	3.78548	3.6422e-37	1.44012e-35	Up
RPA3	1.53748	4.9192	3.58857e-37	1.42284e-35	Up
HSCB	1.53724	3.41493	4.58016e-37	1.79125e-35	Up
CCDC24	1.5339	3.86445	6.14464e-37	2.39008e-35	Up
CCDC28B	1.53111	2.37329	1.31208e-36	5.00859e-35	Up
SNCG	1.53	4.87599	8.49072e-37	3.25849e-35	Up
HIKESHI	1.52877	4.35258	1.0302e-36	3.94304e-35	Up
FHIT	1.52667	1.90804	2.81074e-36	1.05609e-34	Up
COMTD1	1.52551	3.3406	1.77863e-36	6.73579e-35	Up
SYCE2	1.52165	0.387618	2.7964e-35	9.78945e-34	Up
EXOSC8	1.52066	3.56008	2.93919e-36	1.10147e-34	Up
TPGS1	1.51895	2.16806	5.75581e-36	2.11287e-34	Up
COMMD3	1.51842	6.04166	2.97434e-36	1.11174e-34	Up
NLRP5	1.51805	0.927125	1.82182e-35	6.48849e-34	Up
PRSS27	1.51674	1.05503	1.80401e-35	6.44104e-34	Up
CNTD1	1.51391	1.78121	1.28213e-35	4.63536e-34	Up
PSTK	1.51346	0.656459	4.39386e-35	1.51235e-33	Up
C7orf55	1.51288	3.415	7.29955e-36	2.65915e-34	Up
ZNF593	1.51224	4.15078	6.89561e-36	2.51839e-34	Up
HHIPL2	1.5092	1.27288	3.30093e-35	1.14717e-33	Up
NDUFC1	1.50896	5.30626	8.96021e-36	3.25584e-34	Up
TUBA3D	1.50578	2.61482	2.05266e-35	7.25661e-34	Up
TIAF1	1.50254	4.19549	2.03542e-35	7.21341e-34	Up
MSS51	1.50151	2.63251	3.28019e-35	1.14273e-33	Up
EFCAB12	1.5009	1.43636	7.10136e-35	2.38702e-33	Up
HSPB11	1.49956	4.25023	2.82003e-35	9.84813e-34	No-Deg
NOVA1	1.49767	4.23062	3.48995e-35	1.20993e-33	No-Deg
FBXO15	1.49631	0.930302	1.98107e-34	6.46024e-33	No-Deg
MIA	1.4961	1.27471	1.39383e-34	4.62024e-33	No-Deg
GNMT	1.49603	1.07871	1.71991e-34	5.6619e-33	No-Deg
CCDC114	1.49525	0.518935	3.96704e-34	1.27952e-32	No-Deg
IFT43	1.49405	4.23019	5.22058e-35	1.78407e-33	No-Deg
AS3MT	1.49344	3.74527	6.00153e-35	2.03641e-33	No-Deg
ROMO1	1.49295	5.57399	5.2963e-35	1.80565e-33	No-Deg
ACYP2	1.4927	2.25413	1.02396e-34	3.40994e-33	No-Deg
NDUFB1	1.48999	5.23816	7.48765e-35	2.51099e-33	No-Deg
LTC4S	1.48655	0.698488	7.72943e-34	2.44902e-32	No-Deg
HPX	1.48373	4.76508	1.54858e-34	5.10962e-33	No-Deg
CPNE7	1.48371	2.66299	2.31499e-34	7.50046e-33	No-Deg
RPL39L	1.48313	3.86998	1.83715e-34	6.00651e-33	No-Deg
TTC32	1.48121	0.983934	9.5544e-34	3.00733e-32	No-Deg
ROPN1L	1.4799	0.835354	1.31545e-33	4.0956e-32	No-Deg
C5orf49	1.47822	2.20839	5.11405e-34	1.6421e-32	No-Deg
RIBC1	1.47799	2.10544	5.52711e-34	1.76683e-32	No-Deg
SNTN	1.47729	0.552162	2.59031e-33	7.76174e-32	No-Deg
CCDC159	1.47561	3.73151	4.28661e-34	1.3795e-32	No-Deg
NME3	1.47458	6.28402	3.91388e-34	1.26522e-32	No-Deg
GAD1	1.4737	1.15523	1.78099e-33	5.40435e-32	No-Deg
HAGHL	1.47367	3.79897	5.23726e-34	1.67791e-32	No-Deg
BATF	1.47225	3.84518	6.07095e-34	1.93207e-32	No-Deg
CHCHD5	1.47206	4.41197	5.7612e-34	1.83757e-32	No-Deg
CATSPER2	1.47057	0.41432	6.59624e-33	1.90495e-31	No-Deg
REM2	1.47016	0.697618	4.47219e-33	1.31266e-31	No-Deg
MAGOH	1.46729	4.42072	9.67366e-34	3.03821e-32	No-Deg
TMEM126A	1.4667	3.41317	1.20072e-33	3.74651e-32	No-Deg
SCGB2A1	1.46649	5.21885	9.90502e-34	3.10408e-32	No-Deg
XPA	1.4634	3.42025	1.71473e-33	5.22537e-32	No-Deg
YAE1D1	1.46321	2.8655	2.01431e-33	6.0866e-32	No-Deg
ZCWPW1	1.46302	2.4079	2.4235e-33	7.29236e-32	No-Deg
84320	1.46216	4.90707	1.61682e-33	4.9522e-32	No-Deg
RND2	1.46202	2.56678	2.53258e-33	7.60462e-32	No-Deg
C8orf59	1.46084	5.78368	1.77789e-33	5.40435e-32	No-Deg
LSM5	1.46082	5.61459	1.79485e-33	5.4349e-32	No-Deg
EFCAB2	1.45719	2.51826	4.33568e-33	1.27521e-31	No-Deg
CDRT4	1.45661	3.38178	3.59519e-33	1.06836e-31	No-Deg
FAM173A	1.456	3.84012	3.53477e-33	1.05258e-31	No-Deg
SPACA6	1.45487	1.60902	9.03108e-33	2.577e-31	No-Deg
PCSK4	1.45397	2.40948	6.39124e-33	1.8532e-31	No-Deg
COX7A2	1.45385	6.53164	3.69464e-33	1.09338e-31	No-Deg
COX16	1.45149	6.23351	4.80359e-33	1.40657e-31	No-Deg
NHLRC4	1.45124	2.33727	8.82627e-33	2.52358e-31	No-Deg
CCDC12	1.45096	4.65808	5.51952e-33	1.6102e-31	No-Deg
GAGE12F	1.4503	-1.08705	4.01103e-30	9.61106e-29	No-Deg
LMNTD2	1.44728	1.51408	2.16622e-32	6.06078e-31	No-Deg
UQCRB	1.4468	7.87082	7.71692e-33	2.22227e-31	No-Deg
FAM162A	1.44664	5.96641	8.14462e-33	2.338e-31	No-Deg
AMT	1.44627	2.04808	1.71706e-32	4.84184e-31	No-Deg
CST5	1.44588	2.74268	1.3413e-32	3.81221e-31	No-Deg
ATP6AP1L	1.44529	1.05483	4.02214e-32	1.11447e-30	No-Deg
PRR22	1.44216	0.973031	6.08486e-32	1.65409e-30	No-Deg
TGM3	1.44124	0.756176	8.65118e-32	2.3123e-30	No-Deg
EBPL	1.44084	4.7133	1.62049e-32	4.57852e-31	No-Deg
RAMP1	1.44003	4.71151	1.76843e-32	4.97692e-31	No-Deg
CFAP61	1.43641	0.305728	2.78058e-31	7.23002e-30	No-Deg
TLE6	1.43598	1.85497	5.6599e-32	1.54442e-30	No-Deg
C11orf74	1.43475	2.51486	4.71286e-32	1.29091e-30	No-Deg
ADRB1	1.43353	0.293688	3.8135e-31	9.80916e-30	No-Deg
MFSD6L	1.4312	1.18597	1.53702e-31	4.04787e-30	No-Deg
LIAS	1.43086	2.64527	6.77534e-32	1.82794e-30	No-Deg
TPRKB	1.43076	4.04785	5.05078e-32	1.38084e-30	No-Deg
TCTE3	1.43028	0.571363	3.43996e-31	8.86422e-30	No-Deg
ZMYND12	1.42982	1.58459	1.28271e-31	3.39056e-30	No-Deg
MESP1	1.42854	2.13424	1.06351e-31	2.82155e-30	No-Deg
NME1-NME2	1.42791	3.06288	8.17116e-32	2.18807e-30	No-Deg
NDUFA2	1.42615	5.93104	7.17916e-32	1.92963e-30	No-Deg
NMRK1	1.42403	3.86779	1.05103e-31	2.79359e-30	No-Deg
KIF12	1.42179	5.51575	1.15467e-31	3.05775e-30	No-Deg
NME5	1.42101	3.04288	1.69032e-31	4.44344e-30	No-Deg
C10orf11	1.42071	1.63409	3.19158e-31	8.25384e-30	No-Deg
140606	1.41761	6.4571	1.73202e-31	4.54473e-30	No-Deg
FBXO16	1.41718	1.74633	4.27617e-31	1.09404e-29	No-Deg
MYL5	1.41688	2.78635	2.78827e-31	7.2369e-30	No-Deg
CXCL13	1.41588	6.94897	2.05627e-31	5.35639e-30	No-Deg
ATAD3C	1.41525	2.68194	3.41231e-31	8.8088e-30	No-Deg
IFI27L1	1.41426	2.26608	4.41664e-31	1.12597e-29	No-Deg
AHSA2	1.41362	4.22785	2.97667e-31	7.71193e-30	No-Deg
FAM81B	1.40959	1.03884	1.62947e-30	3.99792e-29	No-Deg
ZNF692	1.40953	4.79036	4.32791e-31	1.10531e-29	No-Deg
GAMT	1.40943	5.50278	4.19077e-31	1.07411e-29	No-Deg
MED31	1.40901	1.96647	8.74097e-31	2.19334e-29	No-Deg
TMEM121	1.40888	2.7022	6.55151e-31	1.65845e-29	No-Deg
CASQ1	1.40854	1.0019	1.88284e-30	4.58818e-29	No-Deg
COX7B	1.40792	6.508	4.74554e-31	1.20553e-29	No-Deg
CCDC84	1.40688	2.56114	8.43568e-31	2.12044e-29	No-Deg
CCDC78	1.4052	2.69934	9.57873e-31	2.39936e-29	No-Deg
OAZ3	1.4051	2.21547	1.15902e-30	2.87313e-29	No-Deg
TMEM160	1.40478	2.3274	1.14209e-30	2.83605e-29	No-Deg
LY86	1.40428	2.96917	9.74645e-31	2.43288e-29	No-Deg
ATP5D	1.40332	5.92794	7.75708e-31	1.95329e-29	No-Deg
LRRC46	1.40332	2.62994	1.18801e-30	2.93991e-29	No-Deg
MOK	1.40268	3.25458	1.07459e-30	2.67306e-29	No-Deg
LSM3	1.40117	6.1673	9.61222e-31	2.40356e-29	No-Deg
COPS9	1.40078	5.5101	1.02478e-30	2.55358e-29	No-Deg
200765	1.40051	1.91497	2.14446e-30	5.20803e-29	No-Deg
NPHP1	1.39778	2.07681	2.60902e-30	6.29365e-29	No-Deg
ALKBH6	1.39587	2.63186	2.54311e-30	6.15536e-29	No-Deg
TRH	1.39534	4.60379	1.89428e-30	4.60824e-29	No-Deg
C14orf79	1.3925	4.33701	2.59632e-30	6.27357e-29	No-Deg
BRINP2	1.39106	2.46583	4.3931e-30	1.04741e-28	No-Deg
EWSAT1	1.39036	2.77326	4.26773e-30	1.01921e-28	No-Deg
PSMG4	1.38913	2.84112	4.74185e-30	1.12496e-28	No-Deg
LINC00173	1.38864	0.65006	2.07099e-29	4.71077e-28	No-Deg
CST3	1.38771	8.42288	3.7011e-30	8.88325e-29	No-Deg
B9D1	1.38758	3.09067	5.20586e-30	1.23097e-28	No-Deg
SAT2	1.38639	4.75139	4.66939e-30	1.1096e-28	No-Deg
ZNF69	1.38475	1.71375	1.18295e-29	2.73412e-28	No-Deg
C1D	1.38128	2.90522	1.03053e-29	2.38954e-28	No-Deg
PIN4	1.38125	4.25803	8.21481e-30	1.92659e-28	No-Deg
U2AF1L4	1.381	2.91087	1.05873e-29	2.45097e-28	No-Deg
FAM71E1	1.38007	1.04364	3.14424e-29	7.04045e-28	No-Deg
MAGIX	1.38001	2.22707	1.46888e-29	3.36786e-28	No-Deg
ZBTB8OS	1.37988	3.89001	9.84922e-30	2.29118e-28	No-Deg
GABRA1	1.37806	-3.3044	6.1092e-19	6.48561e-18	No-Deg
DPM3	1.37531	4.61128	1.44865e-29	3.33632e-28	No-Deg
GSTM2	1.37239	5.78096	1.82312e-29	4.16677e-28	No-Deg
HPN	1.37171	5.57055	1.96746e-29	4.4895e-28	No-Deg
LRRC37A3	1.37115	2.79828	2.93281e-29	6.59791e-28	No-Deg
NDUFV2	1.36987	6.67691	2.29475e-29	5.21148e-28	No-Deg
LCN12	1.36926	1.10351	8.65772e-29	1.88279e-27	No-Deg
STX8	1.36884	4.01838	2.93934e-29	6.60224e-28	No-Deg
SNRPG	1.36855	5.83718	2.67697e-29	6.0318e-28	No-Deg
ZNF90	1.36836	2.6231	4.07709e-29	9.08672e-28	No-Deg
INO80B	1.36811	3.6268	3.33686e-29	7.46011e-28	No-Deg
NMU	1.36755	-1.04807	8.44446e-27	1.60322e-25	No-Deg
C5orf38	1.36548	2.94684	4.96329e-29	1.10276e-27	No-Deg
PAXIP1-AS1	1.36389	3.38822	5.29024e-29	1.17177e-27	No-Deg
CFAP45	1.36356	2.87642	6.11646e-29	1.34646e-27	No-Deg
EFCAB11	1.36338	1.90494	8.92433e-29	1.93784e-27	No-Deg
TMEM91	1.36327	2.17623	7.95699e-29	1.73566e-27	No-Deg
NFU1	1.36187	4.63433	5.55447e-29	1.22651e-27	No-Deg
NDP	1.36088	3.36158	7.17012e-29	1.56879e-27	No-Deg
CITED4	1.36032	6.17819	6.02653e-29	1.32871e-27	No-Deg
LAMTOR4	1.35994	6.01426	6.28781e-29	1.38207e-27	No-Deg
TSPAN10	1.35893	0.735011	3.44255e-28	7.17139e-27	No-Deg
KCNQ5	1.3588	1.83021	1.45689e-28	3.10709e-27	No-Deg
CCDC96	1.35714	2.66431	1.22424e-28	2.64233e-27	No-Deg
MT1F	1.35482	2.55367	1.59184e-28	3.38987e-27	No-Deg
DMKN	1.35436	3.85972	1.26471e-28	2.72559e-27	No-Deg
HIST1H4J	1.35341	0.866878	5.09254e-28	1.05019e-26	No-Deg
84331	1.35242	4.99434	1.38338e-28	2.96353e-27	No-Deg
DPCD	1.35107	4.39881	1.65104e-28	3.50034e-27	No-Deg
POLE4	1.35075	4.81773	1.64924e-28	3.50034e-27	No-Deg
FAM174A	1.34982	4.40033	1.86729e-28	3.94716e-27	No-Deg
LINC00152	1.34809	4.06374	2.28789e-28	4.81497e-27	No-Deg
NDUFAB1	1.34803	5.89883	2.04999e-28	4.327e-27	No-Deg
ZNHIT1	1.34725	5.78438	2.22295e-28	4.68517e-27	No-Deg
SAP30	1.3464	3.05549	3.17776e-28	6.64874e-27	No-Deg
COX6C	1.3462	9.90937	2.35404e-28	4.94693e-27	No-Deg
CACNA1A	1.34609	0.33152	1.99191e-27	3.97634e-26	No-Deg
CENPV	1.34508	2.52065	4.17959e-28	8.69415e-27	No-Deg
DEFB1	1.34386	0.522717	1.89286e-27	3.78387e-26	No-Deg
METTL5	1.34334	5.25278	3.33459e-28	6.9566e-27	No-Deg
GSDMB	1.34275	2.67084	5.00966e-28	1.03458e-26	No-Deg
TESC	1.34241	0.809304	1.55623e-27	3.12399e-26	No-Deg
GTF3C6	1.34065	5.54401	4.28394e-28	8.89832e-27	No-Deg
POLR2H	1.34007	5.63495	4.51791e-28	9.35722e-27	No-Deg
SERPINA6	1.34005	6.05849	4.46632e-28	9.26375e-27	No-Deg
PTS	1.33891	3.58767	5.98066e-28	1.23157e-26	No-Deg
GLI4	1.33808	3.22949	6.89938e-28	1.41669e-26	No-Deg
C6orf203	1.33758	3.38521	7.03812e-28	1.44106e-26	No-Deg
SLC52A1	1.33737	0.905634	2.28477e-27	4.55462e-26	No-Deg
CBR3	1.33575	4.03505	7.66548e-28	1.56282e-26	No-Deg
MGMT	1.33568	4.50308	7.38681e-28	1.5103e-26	No-Deg
ATP23	1.33542	2.05458	1.27162e-27	2.57065e-26	No-Deg
POMP	1.33529	7.27424	6.94638e-28	1.42431e-26	No-Deg
ENPP3	1.33503	0.128599	7.76006e-27	1.47719e-25	No-Deg
MRPS9	1.33498	4.57455	7.85712e-28	1.59962e-26	No-Deg
APITD1	1.33216	3.51626	1.16404e-27	2.35982e-26	No-Deg
HSF4	1.33214	2.63263	1.41664e-27	2.85176e-26	No-Deg
TMEM256	1.33165	4.51956	1.09074e-27	2.21435e-26	No-Deg
MGST2	1.33123	5.19809	1.08797e-27	2.21185e-26	No-Deg
AMDHD1	1.33102	0.956604	3.98119e-27	7.80729e-26	No-Deg
SPATA17	1.32999	2.88917	1.62661e-27	3.26072e-26	No-Deg
AAMDC	1.32997	4.40038	1.29646e-27	2.61717e-26	No-Deg
SLC24A5	1.32885	1.31067	3.65274e-27	7.19174e-26	No-Deg
NENF	1.32735	6.59654	1.51516e-27	3.04582e-26	No-Deg
SRRM2-AS1	1.32679	0.516188	9.57343e-27	1.80799e-25	No-Deg
ANG	1.32617	4.30898	1.88568e-27	3.77478e-26	No-Deg
SMIM1	1.32608	1.45146	4.31241e-27	8.40978e-26	No-Deg
SPAG4	1.32391	1.91069	4.0948e-27	8.01809e-26	No-Deg
IMMP1L	1.32371	3.01664	2.88746e-27	5.71637e-26	No-Deg
EIF4EBP3	1.32321	4.26375	2.51855e-27	5.00675e-26	No-Deg
KRTDAP	1.32199	-1.81585	1.98682e-23	2.95818e-22	No-Deg
CORO6	1.32198	2.44476	3.9817e-27	7.80729e-26	No-Deg
MRPL22	1.3209	4.49521	3.08288e-27	6.08647e-26	No-Deg
MRPL52	1.31811	4.7542	3.95346e-27	7.77316e-26	No-Deg
LSM7	1.31777	4.56942	4.13568e-27	8.08711e-26	No-Deg
CPT1B	1.31721	3.93708	4.63156e-27	9.0077e-26	No-Deg
VIPR2	1.31713	2.43585	6.3401e-27	1.21657e-25	No-Deg
RPS27L	1.31595	5.98297	4.60184e-27	8.96204e-26	No-Deg
MRPL53	1.31528	4.8264	5.15524e-27	9.98558e-26	No-Deg
DERL2	1.31493	4.97204	5.28557e-27	1.02242e-25	No-Deg
POLB	1.31457	5.68682	5.29795e-27	1.02344e-25	No-Deg
RWDD1	1.31432	6.27233	5.3407e-27	1.03031e-25	No-Deg
HAUS1	1.31427	4.26527	5.92808e-27	1.14056e-25	No-Deg
NDUFA3	1.31397	5.42304	5.67105e-27	1.09257e-25	No-Deg
C16orf74	1.31381	3.11722	7.27674e-27	1.38887e-25	No-Deg
RPL37A	1.31278	9.27926	6.01039e-27	1.15485e-25	No-Deg
RIDA	1.31242	4.12568	7.16356e-27	1.37091e-25	No-Deg
MRPS36	1.31233	4.13197	7.21911e-27	1.3797e-25	No-Deg
KCNC2	1.31175	2.5688	1.01318e-26	1.90342e-25	No-Deg
CCDC85B	1.31162	4.12578	7.73429e-27	1.47424e-25	No-Deg
ZMYND10	1.3105	3.88364	8.83562e-27	1.67085e-25	No-Deg
FBXO25	1.31022	4.53914	8.52065e-27	1.61555e-25	No-Deg
BAG1	1.3095	6.60459	8.39663e-27	1.59625e-25	No-Deg
NDUFS4	1.30843	5.0035	9.79757e-27	1.84305e-25	No-Deg
RAB13	1.30676	6.97973	1.0833e-26	2.03249e-25	No-Deg
FAM229B	1.30641	3.17435	1.45093e-26	2.70106e-25	No-Deg
CCDC74B	1.30431	3.28182	1.73373e-26	3.21502e-25	No-Deg
SF3B6	1.3041	6.65651	1.40044e-26	2.61385e-25	No-Deg
ATP5L	1.30395	6.97715	1.41317e-26	2.63419e-25	No-Deg
QTRT1	1.30322	4.59549	1.64794e-26	3.05988e-25	No-Deg
KIAA1257	1.30089	1.62879	4.14399e-26	7.55764e-25	No-Deg
RNF183	1.29954	1.698	4.52513e-26	8.20065e-25	No-Deg
AGTR1	1.29673	4.71602	3.00991e-26	5.53861e-25	No-Deg
PSMC3IP	1.29573	2.68217	4.42625e-26	8.0316e-25	No-Deg
TMEM81	1.29492	1.43512	8.09045e-26	1.44072e-24	No-Deg
PTTG1	1.2948	4.25949	3.73662e-26	6.84952e-25	No-Deg
SSBP1	1.29375	6.04761	3.76201e-26	6.88726e-25	No-Deg
TCEB2	1.2929	7.51528	3.98102e-26	7.27892e-25	No-Deg
VMO1	1.29237	0.933175	1.49393e-25	2.60856e-24	No-Deg
ATP6V1E2	1.29185	1.46133	1.0572e-25	1.86643e-24	No-Deg
SCRG1	1.29039	-1.60476	8.00183e-23	1.14279e-21	No-Deg
SARNP	1.29029	5.67554	5.26157e-26	9.48735e-25	No-Deg
CAMKMT	1.28989	2.05657	9.3736e-26	1.66098e-24	No-Deg
CCDC74A	1.28929	5.53331	5.80415e-26	1.04395e-24	No-Deg
ATP5J	1.28818	6.35871	6.29076e-26	1.12864e-24	No-Deg
ABHD14A	1.28733	3.68045	7.99631e-26	1.42699e-24	No-Deg
IFI27L2	1.28715	3.52074	8.31629e-26	1.47895e-24	No-Deg
C18orf21	1.28707	3.55951	8.32575e-26	1.47895e-24	No-Deg
MESP2	1.28669	0.160919	6.1769e-25	1.0333e-23	No-Deg
GADD45G	1.28662	4.28234	8.00341e-26	1.42699e-24	No-Deg
PIFO	1.28591	3.41566	9.47754e-26	1.67526e-24	No-Deg
NDUFA4	1.28364	7.49955	9.44782e-26	1.67207e-24	No-Deg
CCDC53	1.28264	4.23721	1.16263e-25	2.045e-24	No-Deg
CALML3	1.28227	4.54916	1.17406e-25	2.06259e-24	No-Deg
MIR4435-2HG	1.28104	3.87738	1.39853e-25	2.44496e-24	No-Deg
OCIAD2	1.2809	5.35812	1.27512e-25	2.23466e-24	No-Deg
TIMM9	1.28035	4.69945	1.38846e-25	2.43031e-24	No-Deg
ZNF771	1.27995	1.53745	3.01021e-25	5.17431e-24	No-Deg
CFAP70	1.276	2.20475	3.18085e-25	5.44157e-24	No-Deg
HSD17B2	1.27494	1.24433	5.71939e-25	9.61245e-24	No-Deg
NEIL1	1.27367	2.402	3.68192e-25	6.26888e-24	No-Deg
AZGP1	1.27343	10.2351	2.40303e-25	4.15551e-24	No-Deg
FAM71D	1.27302	0.354755	1.59816e-24	2.61258e-23	No-Deg
MAATS1	1.27258	2.05283	4.60203e-25	7.79845e-24	No-Deg
PTGR2	1.27199	4.11843	3.13904e-25	5.37645e-24	No-Deg
84419	1.27186	4.9846	2.98708e-25	5.14072e-24	No-Deg
YBX2	1.27036	2.64046	4.65397e-25	7.87718e-24	No-Deg
RP9P	1.26978	2.9864	4.5244e-25	7.67597e-24	No-Deg
TMOD1	1.26969	3.02704	4.52175e-25	7.67597e-24	No-Deg
THUMPD2	1.26967	3.10458	4.46122e-25	7.58672e-24	No-Deg
LYPLAL1	1.26956	5.20402	3.6505e-25	6.22275e-24	No-Deg
RPL36A	1.26918	1.77172	7.08542e-25	1.17978e-23	No-Deg
C5orf46	1.26854	0.844842	1.3999e-24	2.30421e-23	No-Deg
LRRC6	1.2679	2.69308	5.74051e-25	9.63667e-24	No-Deg
C2CD4D	1.26737	-0.365916	8.65729e-24	1.32613e-22	No-Deg
PDZK1	1.26639	5.09308	4.90402e-25	8.28088e-24	No-Deg
KRT10	1.26561	4.74257	5.36845e-25	9.03321e-24	No-Deg
ARV1	1.26547	5.52077	5.24045e-25	8.82819e-24	No-Deg
ANKS3	1.26541	3.89589	5.8635e-25	9.83163e-24	No-Deg
CHEK2	1.26482	3.01089	7.06916e-25	1.17844e-23	No-Deg
HYI	1.26422	4.11165	6.39446e-25	1.06845e-23	No-Deg
RWDD3	1.26382	3.0298	7.71739e-25	1.28352e-23	No-Deg
BBIP1	1.26341	2.77659	8.46325e-25	1.40431e-23	No-Deg
PRORSD1P	1.26321	0.337195	3.89719e-24	6.15362e-23	No-Deg
COMMD4	1.26316	5.64592	6.44412e-25	1.07549e-23	No-Deg
NDUFB2	1.25945	6.15121	8.906e-25	1.47607e-23	No-Deg
CCDC107	1.25689	4.15163	1.23948e-24	2.04251e-23	No-Deg
C19orf38	1.25666	0.845875	4.02592e-24	6.34292e-23	No-Deg
NDUFAF4	1.25657	2.8983	1.52713e-24	2.50502e-23	No-Deg
POLN	1.2564	1.15949	3.20355e-24	5.10895e-23	No-Deg
TBCA	1.25631	6.42829	1.17732e-24	1.9423e-23	No-Deg
DNAJC17	1.25529	3.87149	1.47296e-24	2.41893e-23	No-Deg
CCDC28A	1.25397	4.21633	1.60463e-24	2.62016e-23	No-Deg
SNRPD1	1.25365	5.48774	1.53479e-24	2.51471e-23	No-Deg
ALG1L	1.25336	1.44632	3.48597e-24	5.53474e-23	No-Deg
BEND5	1.25279	1.83017	3.01226e-24	4.81459e-23	No-Deg
UQCC2	1.25237	5.52206	1.72067e-24	2.80008e-23	No-Deg
GDF9	1.25231	4.30162	1.85056e-24	3.00125e-23	No-Deg
LUC7L	1.25218	5.3653	1.76148e-24	2.86001e-23	No-Deg
SMDT1	1.25134	5.21639	1.91166e-24	3.08988e-23	No-Deg
SCAND1	1.25112	5.72122	1.91451e-24	3.09099e-23	No-Deg
6158	1.2503	9.26655	1.98079e-24	3.19083e-23	No-Deg
C14orf2	1.24948	5.72995	2.2188e-24	3.56623e-23	No-Deg
TFPT	1.24918	4.18301	2.47684e-24	3.97207e-23	No-Deg
PSMA4	1.24916	7.76964	2.20878e-24	3.55411e-23	No-Deg
PCDHA1	1.24728	1.09861	7.50913e-24	1.15518e-22	No-Deg
EML5	1.24686	0.311747	1.68116e-23	2.51351e-22	No-Deg
IGSF21	1.24635	3.68558	3.36205e-24	5.35577e-23	No-Deg
THAP3	1.24617	3.61898	3.44539e-24	5.47638e-23	No-Deg
CFAP126	1.24598	1.43029	6.76828e-24	1.04908e-22	No-Deg
CBWD7	1.2456	3.82089	3.53679e-24	5.60305e-23	No-Deg
LAMTOR2	1.24465	5.99486	3.39821e-24	5.40737e-23	No-Deg
THOC7	1.24437	5.5418	3.5298e-24	5.59814e-23	No-Deg
4925	1.24359	8.16092	3.63573e-24	5.75343e-23	No-Deg
IDNK	1.24302	2.59868	5.51542e-24	8.60466e-23	No-Deg
PHYHD1	1.24268	4.44754	4.34033e-24	6.83079e-23	No-Deg
THYN1	1.2424	4.76785	4.35766e-24	6.85055e-23	No-Deg
PERM1	1.24173	1.21723	1.12518e-23	1.70716e-22	No-Deg
FUNDC1	1.2409	4.44527	5.08781e-24	7.97219e-23	No-Deg
TMEM60	1.24069	4.05606	5.35335e-24	8.36089e-23	No-Deg
CIART	1.23991	3.21578	6.38685e-24	9.92104e-23	No-Deg
EMG1	1.23941	4.91784	5.64493e-24	8.79714e-23	No-Deg
ZNF385D	1.23912	1.52529	1.17466e-23	1.77847e-22	No-Deg
RBP1	1.23896	5.0939	5.8253e-24	9.06839e-23	No-Deg
WDR83	1.23856	3.2205	7.19429e-24	1.11271e-22	No-Deg
NDUFA13	1.23826	7.23093	5.89418e-24	9.16568e-23	No-Deg
AOC1	1.23822	2.43404	8.83124e-24	1.35133e-22	No-Deg
BNIP1	1.23772	3.49853	7.43238e-24	1.1446e-22	No-Deg
GAL	1.23736	-0.25592	9.07617e-23	1.2898e-21	No-Deg
SH3BGR	1.23643	2.77428	9.47654e-24	1.44699e-22	No-Deg
ST7-AS1	1.23622	0.337089	4.0814e-23	5.94725e-22	No-Deg
MIF	1.23594	8.56523	7.1794e-24	1.11161e-22	No-Deg
FAM24B	1.23587	0.567379	3.24112e-23	4.75176e-22	No-Deg
HIST1H1C	1.23587	6.25015	7.39747e-24	1.14045e-22	No-Deg
CFAP36	1.23498	5.91078	8.06741e-24	1.23841e-22	No-Deg
RPL24	1.23305	8.85669	9.27211e-24	1.41728e-22	No-Deg
SNRNP35	1.23299	4.55267	1.01966e-23	1.55033e-22	No-Deg
MYH3	1.23118	0.653197	4.45375e-23	6.45052e-22	No-Deg
653784	1.23102	5.57113	1.15717e-23	1.75384e-22	No-Deg
NDUFS6	1.2299	5.59158	1.27644e-23	1.92851e-22	No-Deg
CRACR2B	1.22953	6.50978	1.29133e-23	1.94894e-22	No-Deg
S100A13	1.2294	6.64941	1.30251e-23	1.96375e-22	No-Deg
GSTO2	1.22873	4.20702	1.52384e-23	2.28783e-22	No-Deg
HIST1H2BD	1.22825	5.44127	1.48431e-23	2.23315e-22	No-Deg
BCCIP	1.22808	6.68868	1.46367e-23	2.20442e-22	No-Deg
OSCP1	1.2277	3.68139	1.75936e-23	2.62496e-22	No-Deg
KIF9	1.22415	3.27417	2.53976e-23	3.76583e-22	No-Deg
TTLL9	1.22355	0.524234	9.76123e-23	1.38579e-21	No-Deg
LSM8	1.22264	4.592	2.53099e-23	3.7567e-22	No-Deg
CFAP69	1.22216	3.34078	2.99272e-23	4.41465e-22	No-Deg
GLRX2	1.22203	3.01378	3.19753e-23	4.69746e-22	No-Deg
SURF2	1.22189	3.47235	3.00547e-23	4.4289e-22	No-Deg
SPATA7	1.22149	2.58058	3.68156e-23	5.38254e-22	No-Deg
TPRG1	1.22139	5.61196	2.69764e-23	3.99579e-22	No-Deg
RAB26	1.21969	3.24123	3.76876e-23	5.50285e-22	No-Deg
NDUFB3	1.21858	5.15716	3.50814e-23	5.13799e-22	No-Deg
AMZ2P1	1.21743	3.21228	4.6108e-23	6.67125e-22	No-Deg
DYRK4	1.21686	4.07297	4.36059e-23	6.33478e-22	No-Deg
C6orf1	1.2164	4.71754	4.33501e-23	6.304e-22	No-Deg
UXT	1.21592	5.51744	4.3653e-23	6.3352e-22	No-Deg
SPHAR	1.21372	3.40827	6.17415e-23	8.87952e-22	No-Deg
UBL5	1.21242	6.73809	5.76064e-23	8.29313e-22	No-Deg
BUD31	1.21072	5.82416	6.79945e-23	9.7495e-22	No-Deg
C8orf44	1.20888	0.390678	3.89934e-22	5.28491e-21	No-Deg
MLXIPL	1.2083	1.18406	2.06242e-22	2.86009e-21	No-Deg
NPW	1.20787	1.2537	2.04785e-22	2.84263e-21	No-Deg
HSPE1	1.20784	6.6703	8.57485e-23	1.22219e-21	No-Deg
TMEM99	1.206	4.51606	1.08062e-22	1.52508e-21	No-Deg
PYCARD	1.20587	6.28758	1.02342e-22	1.44863e-21	No-Deg
UBXN11	1.20582	4.59914	1.09214e-22	1.53983e-21	No-Deg
RPLP1	1.20575	10.6072	1.00749e-22	1.42891e-21	No-Deg
FRG1	1.20455	5.53548	1.16873e-22	1.64459e-21	No-Deg
HYLS1	1.20299	3.07437	1.64096e-22	2.29113e-21	No-Deg
CINP	1.20277	4.60603	1.41976e-22	1.99391e-21	No-Deg
GADD45GIP1	1.20191	5.66419	1.46128e-22	2.05022e-21	No-Deg
CCS	1.201	4.8663	1.62966e-22	2.27756e-21	No-Deg
ITIH4	1.20043	1.48179	3.37928e-22	4.61931e-21	No-Deg
C14orf166	1.19997	7.39622	1.67664e-22	2.33866e-21	No-Deg
CRIP1	1.19859	9.14318	1.8714e-22	2.60274e-21	No-Deg
ZNHIT2	1.19817	3.76484	2.25484e-22	3.12089e-21	No-Deg
ZNF563	1.19787	2.10343	3.22631e-22	4.42285e-21	No-Deg
C16orf71	1.19773	0.938354	5.97361e-22	7.99807e-21	No-Deg
CEMP1	1.19745	3.12982	2.61135e-22	3.597e-21	No-Deg
UGT3A2	1.19641	0.331109	1.17845e-21	1.5461e-20	No-Deg
SLC27A5	1.19635	2.39841	3.35482e-22	4.59025e-21	No-Deg
POLR2I	1.19568	4.64803	2.59978e-22	3.5845e-21	No-Deg
CTXN1	1.1956	4.95749	2.57664e-22	3.55943e-21	No-Deg
RBM34	1.19514	5.59859	2.61403e-22	3.59724e-21	No-Deg
THAP7-AS1	1.19505	1.02758	7.00426e-22	9.33446e-21	No-Deg
RPL38	1.19482	8.57413	2.58931e-22	3.5735e-21	No-Deg
PLGRKT	1.19434	4.82323	2.88716e-22	3.9617e-21	No-Deg
CYP2E1	1.19399	0.896396	8.43469e-22	1.11785e-20	No-Deg
RPS15	1.19394	7.90391	2.79885e-22	3.8442e-21	No-Deg
PPP1R35	1.19293	3.97844	3.45217e-22	4.71446e-21	No-Deg
EMID1	1.19217	3.67791	3.79492e-22	5.16289e-21	No-Deg
C2orf74	1.19127	3.21945	4.35182e-22	5.87045e-21	No-Deg
PSMG1	1.19117	4.20035	3.9328e-22	5.32022e-21	No-Deg
NOTCH2NL	1.19036	5.46622	3.94748e-22	5.33504e-21	No-Deg
USE1	1.19012	3.73816	4.48686e-22	6.03561e-21	No-Deg
ENOX1	1.18998	2.22115	6.05743e-22	8.09463e-21	No-Deg
ADAT3	1.18964	1.26055	9.46899e-22	1.24687e-20	No-Deg
CHCHD1	1.18915	5.20039	4.41559e-22	5.95089e-21	No-Deg
ZNF503-AS2	1.18895	0.728636	1.47031e-21	1.91674e-20	No-Deg
FBXL8	1.18804	1.92139	7.89651e-22	1.04749e-20	No-Deg
MRPL41	1.18802	5.49778	4.80708e-22	6.4603e-21	No-Deg
C12orf57	1.18765	6.39705	4.85985e-22	6.52511e-21	No-Deg
HSD17B7	1.18726	4.27671	5.44693e-22	7.30653e-21	No-Deg
TRMU	1.18678	3.61477	6.0339e-22	8.07125e-21	No-Deg
PSMC1	1.1863	5.00335	5.66714e-22	7.59482e-21	No-Deg
FAM221A	1.18506	1.52806	1.19986e-21	1.57275e-20	No-Deg
FKBP2	1.18255	5.9585	7.54778e-22	1.00216e-20	No-Deg
NSMCE1	1.18252	6.20899	7.52506e-22	1.00007e-20	No-Deg
MCUR1	1.18145	4.01304	9.08789e-22	1.19888e-20	No-Deg
KATNAL2	1.18075	1.80948	1.51661e-21	1.97531e-20	No-Deg
C6orf226	1.18069	1.71289	1.58703e-21	2.06142e-20	No-Deg
BIN3	1.18068	4.40546	9.40558e-22	1.23965e-20	No-Deg
MAGOHB	1.18039	4.55619	9.55123e-22	1.25654e-20	No-Deg
FBXL15	1.17956	3.51739	1.12101e-21	1.47208e-20	No-Deg
NDUFA5	1.17907	6.8872	9.96085e-22	1.30923e-20	No-Deg
MEF2B	1.17907	0.832644	3.04951e-21	3.86316e-20	No-Deg
ANKRD24	1.17882	0.838634	3.09494e-21	3.91726e-20	No-Deg
MCEE	1.17851	2.92207	1.34068e-21	1.75413e-20	No-Deg
OTOA	1.1785	0.529321	4.1611e-21	5.18891e-20	No-Deg
LGALS9C	1.17765	0.824437	3.44526e-21	4.3301e-20	No-Deg
CBWD2	1.17347	5.69031	1.62802e-21	2.11275e-20	No-Deg
URB1-AS1	1.17328	2.23798	2.43394e-21	3.10527e-20	No-Deg
C9orf116	1.17324	3.34219	1.94556e-21	2.51121e-20	No-Deg
COMMD1	1.17321	4.14263	1.79275e-21	2.32233e-20	No-Deg
BLOC1S1	1.1719	5.78513	1.85191e-21	2.39464e-20	No-Deg
SAAL1	1.17173	3.01392	2.32018e-21	2.96805e-20	No-Deg
PGC	1.17171	-0.82355	6.12482e-20	6.99359e-19	No-Deg
MRPS30	1.17133	6.58387	1.91225e-21	2.47043e-20	No-Deg
SLC7A13	1.17101	0.676247	6.69742e-21	8.25517e-20	No-Deg
MTFP1	1.17026	3.82864	2.35768e-21	3.01333e-20	No-Deg
LIN7B	1.17012	1.19297	4.94996e-21	6.1619e-20	No-Deg
POP5	1.1696	4.15654	2.41893e-21	3.08886e-20	No-Deg
OVGP1	1.16897	2.2958	3.42015e-21	4.30232e-20	No-Deg
NOL7	1.1688	5.2415	2.43783e-21	3.10748e-20	No-Deg
COQ3	1.16879	2.1911	3.57822e-21	4.48936e-20	No-Deg
MSLN	1.16805	2.32179	3.66454e-21	4.58963e-20	No-Deg
NDUFS5	1.16699	6.6555	2.74215e-21	3.48302e-20	No-Deg
GTF3A	1.16613	7.03847	2.93199e-21	3.71756e-20	No-Deg
MCTS1	1.16497	6.11214	3.27362e-21	4.12884e-20	No-Deg
AMY2B	1.16471	3.36588	3.93552e-21	4.91615e-20	No-Deg
UQCRHL	1.16451	4.09301	3.70929e-21	4.64163e-20	No-Deg
FUT6	1.16428	1.33975	7.33645e-21	9.02315e-20	No-Deg
TIMM8B	1.16363	4.677	3.83997e-21	4.80096e-20	No-Deg
TNNT1	1.16248	5.01098	4.154e-21	5.18455e-20	No-Deg
GKAP1	1.16141	3.21494	5.27629e-21	6.55109e-20	No-Deg
SPATA24	1.15893	1.20403	1.22261e-20	1.47836e-19	No-Deg
TCEAL6	1.15797	1.15256	1.36233e-20	1.63765e-19	No-Deg
NUDT2	1.15788	4.36233	6.28273e-21	7.76711e-20	No-Deg
MSRB2	1.15774	4.9244	6.16548e-21	7.62871e-20	No-Deg
BCL7C	1.15771	5.8262	5.99738e-21	7.43354e-20	No-Deg
ENY2	1.15731	5.32579	6.29066e-21	7.77021e-20	No-Deg
EVA1B	1.15707	5.31477	6.41567e-21	7.91781e-20	No-Deg
RHCE	1.15704	0.465728	2.50097e-20	2.92554e-19	No-Deg
MRPS28	1.15686	3.93814	7.0593e-21	8.68973e-20	No-Deg
MUSTN1	1.15648	0.799676	1.95672e-20	2.3115e-19	No-Deg
PAFAH1B3	1.15628	6.173	6.70053e-21	8.25517e-20	No-Deg
PPA2	1.15509	6.46542	7.34986e-21	9.0319e-20	No-Deg
TMEM145	1.1547	0.834019	2.1995e-20	2.58766e-19	No-Deg
MAP1LC3A	1.15449	3.92725	8.57884e-21	1.05126e-19	No-Deg
SLC4A4	1.1543	3.19851	9.47408e-21	1.15434e-19	No-Deg
C19orf70	1.15357	5.21214	8.58411e-21	1.05126e-19	No-Deg
RANGRF	1.15322	4.16693	9.33525e-21	1.13936e-19	No-Deg
PRSS21	1.15269	1.76381	1.54641e-20	1.85118e-19	No-Deg
CDC26	1.15252	2.30963	1.31095e-20	1.57852e-19	No-Deg
RPS29	1.15183	8.41182	9.4493e-21	1.1523e-19	No-Deg
THOC1	1.15172	5.11834	1.00257e-20	1.22052e-19	No-Deg
APOO	1.15147	3.74281	1.11762e-20	1.35597e-19	No-Deg
CCDC34	1.1509	4.60812	1.09717e-20	1.33229e-19	No-Deg
92292	1.1507	2.9308	1.32672e-20	1.59617e-19	No-Deg
TMEM191A	1.15057	0.292598	4.99006e-20	5.72521e-19	No-Deg
C3orf14	1.15027	4.58092	1.15714e-20	1.40155e-19	No-Deg
AARSD1	1.15024	4.86487	1.14275e-20	1.38529e-19	No-Deg
CMC4	1.14978	3.80981	1.27466e-20	1.53742e-19	No-Deg
C5orf45	1.14942	3.31044	1.38839e-20	1.66758e-19	No-Deg
NBR2	1.14877	2.69866	1.62115e-20	1.93742e-19	No-Deg
THPO	1.14873	1.55642	2.32068e-20	2.72575e-19	No-Deg
IMMP2L	1.14869	2.68599	1.63545e-20	1.95126e-19	No-Deg
HDAC8	1.14814	3.81431	1.45604e-20	1.74737e-19	No-Deg
UNC5CL	1.14769	1.55836	2.52261e-20	2.94846e-19	No-Deg
RND1	1.14715	4.81838	1.47374e-20	1.76713e-19	No-Deg
RAMP3	1.14672	5.47477	1.48939e-20	1.78441e-19	No-Deg
ERMARD	1.14579	4.25572	1.69985e-20	2.02305e-19	No-Deg
TMSB10	1.14555	9.63693	1.57278e-20	1.88117e-19	No-Deg
ACP6	1.14505	4.11115	1.82419e-20	2.16028e-19	No-Deg
RPL27	1.14472	8.73874	1.68592e-20	2.00813e-19	No-Deg
MRPL47	1.1446	5.78301	1.75416e-20	2.08595e-19	No-Deg
C9orf142	1.14438	4.84455	1.84332e-20	2.18114e-19	No-Deg
TRAPPC5	1.14393	5.25894	1.88103e-20	2.22392e-19	No-Deg
NMRAL1	1.1431	5.68457	1.98691e-20	2.34524e-19	No-Deg
ACBD4	1.14286	3.40132	2.33662e-20	2.74223e-19	No-Deg
EIF5AL1	1.14258	6.02053	2.05685e-20	2.42182e-19	No-Deg
PPIH	1.14167	4.31952	2.36434e-20	2.77023e-19	No-Deg
NEK3	1.14032	2.64389	3.24285e-20	3.76271e-19	No-Deg
SNHG11	1.13969	3.51417	2.97741e-20	3.47155e-19	No-Deg
GSTZ1	1.13861	4.60347	2.97641e-20	3.47155e-19	No-Deg
RAB24	1.13791	4.64349	3.1413e-20	3.64782e-19	No-Deg
ATP5I	1.13733	6.22784	3.13123e-20	3.63908e-19	No-Deg
PHF11	1.13692	5.05892	3.33839e-20	3.86731e-19	No-Deg
SULT1A1	1.13596	4.77403	3.65113e-20	4.22618e-19	No-Deg
MYBPC1	1.13561	4.69565	3.76976e-20	4.35998e-19	No-Deg
MED27	1.13477	3.75958	4.30738e-20	4.96577e-19	No-Deg
MT1M	1.13441	0.788033	1.1367e-19	1.26966e-18	No-Deg
GBAP1	1.13395	4.90109	4.26864e-20	4.92507e-19	No-Deg
BNIPL	1.13341	5.18194	4.40751e-20	5.07712e-19	No-Deg
MRPS31	1.13337	3.60594	4.89445e-20	5.62451e-19	No-Deg
SMOC1	1.13331	1.66372	7.5986e-20	8.64205e-19	No-Deg
PALM3	1.13299	1.53784	8.2192e-20	9.31099e-19	No-Deg
LRRC26	1.1321	3.27032	5.64149e-20	6.44684e-19	No-Deg
ODF3B	1.13209	3.55862	5.45053e-20	6.23855e-19	No-Deg
100129534	1.12936	1.13153	1.34666e-19	1.49603e-18	No-Deg
DGUOK	1.12784	5.25669	6.86581e-20	7.81483e-19	No-Deg
RPF2	1.12656	4.79121	7.74387e-20	8.8003e-19	No-Deg
ORM2	1.12564	0.302457	3.44665e-19	3.71953e-18	No-Deg
PRKRIP1	1.12498	4.84344	8.76175e-20	9.90216e-19	No-Deg
FRA10AC1	1.1249	4.72496	8.86747e-20	1.00137e-18	No-Deg
THOC6	1.1248	4.84389	8.88697e-20	1.00279e-18	No-Deg
ZRSR2	1.12451	4.08541	9.50926e-20	1.06881e-18	No-Deg
PPM1J	1.12338	3.72007	1.07265e-19	1.20092e-18	No-Deg
FAAP20	1.12319	4.79195	1.0129e-19	1.13757e-18	No-Deg
RNASEH2B	1.12299	4.99293	1.02012e-19	1.14479e-18	No-Deg
RPP30	1.12245	4.33396	1.10121e-19	1.23193e-18	No-Deg
C16orf13	1.12241	5.74301	1.04392e-19	1.17057e-18	No-Deg
MRPS18C	1.12172	4.47697	1.1566e-19	1.28988e-18	No-Deg
CETN2	1.12029	6.41601	1.21922e-19	1.35866e-18	No-Deg
ATP5E	1.11983	7.99659	1.24724e-19	1.38665e-18	No-Deg
MTHFD2L	1.11901	2.89704	1.68549e-19	1.85948e-18	No-Deg
REEP2	1.11778	1.71561	2.5246e-19	2.75347e-18	No-Deg
SDSL	1.11769	4.05768	1.6353e-19	1.80689e-18	No-Deg
FAM196A	1.11726	3.15316	1.85856e-19	2.0457e-18	No-Deg
AGT	1.11644	4.23	1.78266e-19	1.96366e-18	No-Deg
ARPC3	1.11633	8.29265	1.64186e-19	1.81274e-18	No-Deg
WBSCR27	1.11631	1.7366	2.80859e-19	3.04469e-18	No-Deg
TTC25	1.11583	1.25775	3.60738e-19	3.88714e-18	No-Deg
RMND1	1.11449	6.36448	1.92896e-19	2.12156e-18	No-Deg
STAC3	1.11354	2.25619	2.96167e-19	3.2058e-18	No-Deg
NTHL1	1.11353	4.54334	2.19872e-19	2.41455e-18	No-Deg
DPH5	1.11278	4.21015	2.38023e-19	2.6059e-18	No-Deg
EMC9	1.11258	3.13887	2.6883e-19	2.92312e-18	No-Deg
DNLZ	1.11229	3.15302	2.74648e-19	2.98412e-18	No-Deg
RFXANK	1.11194	5.59298	2.3944e-19	2.61942e-18	No-Deg
CFDP1	1.11157	5.27734	2.48858e-19	2.71625e-18	No-Deg
ATG9B	1.11149	0.252707	1.06835e-18	1.10158e-17	No-Deg
ANKRD35	1.11143	1.541	4.43648e-19	4.75555e-18	No-Deg
PIGF	1.11017	3.65964	3.05431e-19	3.30358e-18	No-Deg
RASSF7	1.11011	5.3688	2.78139e-19	3.01748e-18	No-Deg
DNAJC15	1.1088	5.2174	3.09597e-19	3.34612e-18	No-Deg
EYA1	1.10848	0.578337	9.93657e-19	1.03049e-17	No-Deg
B3GNTL1	1.10736	1.89247	5.32623e-19	5.67861e-18	No-Deg
HYPK	1.10694	5.66911	3.53509e-19	3.8121e-18	No-Deg
ATG10	1.10658	2.12139	5.27635e-19	5.63059e-18	No-Deg
EID2B	1.10641	1.44525	6.81683e-19	7.19426e-18	No-Deg
PEX5L	1.1055	0.544557	1.28162e-18	1.30555e-17	No-Deg
NUPR1	1.10444	7.34869	4.19634e-19	4.50824e-18	No-Deg
CASC2	1.10416	0.754122	1.20489e-18	1.23175e-17	No-Deg
NDUFA12	1.10314	5.14136	4.82763e-19	5.16326e-18	No-Deg
C19orf33	1.10293	5.04631	4.92701e-19	5.26562e-18	No-Deg
ALG5	1.1028	5.12462	4.96057e-19	5.29755e-18	No-Deg
HES4	1.10175	2.22557	7.45139e-19	7.84089e-18	No-Deg
NDUFA7	1.10162	5.25831	5.41276e-19	5.76331e-18	No-Deg
KRTCAP2	1.10068	6.72181	5.65403e-19	6.01128e-18	No-Deg
MRPL2	1.10033	4.57165	6.15239e-19	6.52663e-18	No-Deg
C15orf61	1.09989	2.70562	7.73503e-19	8.12744e-18	No-Deg
MRPL54	1.09981	4.79686	6.33961e-19	6.72027e-18	No-Deg
RAB17	1.09942	4.73539	6.54797e-19	6.9309e-18	No-Deg
FAM104B	1.09932	3.49203	7.22089e-19	7.6151e-18	No-Deg
SERP2	1.09905	1.33672	1.25962e-18	1.28496e-17	No-Deg
KRTCAP3	1.09826	4.01912	7.47305e-19	7.85792e-18	No-Deg
55056	1.09824	4.13828	7.41953e-19	7.8131e-18	No-Deg
CCDC167	1.09763	4.04131	7.83251e-19	8.22385e-18	No-Deg
MYL6B	1.09653	4.64516	8.22755e-19	8.6197e-18	No-Deg
PRH1	1.09644	0.880973	1.9818e-18	1.98915e-17	No-Deg
SERGEF	1.0963	4.1525	8.61073e-19	9.008e-18	No-Deg
PDE6B	1.09606	3.04723	9.81597e-19	1.02093e-17	No-Deg
FDCSP	1.09557	3.6662	9.47386e-19	9.86781e-18	No-Deg
CLTB	1.09488	5.81692	8.99041e-19	9.38468e-18	No-Deg
AK8	1.09473	2.59752	1.17425e-18	1.203e-17	No-Deg
TMEM205	1.09449	6.54249	9.15326e-19	9.54079e-18	No-Deg
FAM103A1	1.09442	4.20801	9.91967e-19	1.02948e-17	No-Deg
GIMAP1	1.09428	2.74483	1.18165e-18	1.20972e-17	No-Deg
PCP4	1.09359	-0.16975	6.67977e-18	6.39165e-17	No-Deg
SGF29	1.09323	4.10371	1.09467e-18	1.12549e-17	No-Deg
DUSP12	1.0927	3.8332	1.164e-18	1.19335e-17	No-Deg
MLLT4-AS1	1.09262	-0.1623	7.10455e-18	6.77552e-17	No-Deg
SPAG7	1.09254	5.23614	1.09269e-18	1.12425e-17	No-Deg
F12	1.09151	3.33905	1.34009e-18	1.36414e-17	No-Deg
CPA6	1.09102	2.71491	1.52498e-18	1.54467e-17	No-Deg
LENG1	1.09044	3.02525	1.51589e-18	1.53655e-17	No-Deg
GEMIN2	1.08981	2.51532	1.73839e-18	1.75588e-17	No-Deg
C15orf40	1.08939	3.37979	1.5681e-18	1.58611e-17	No-Deg
HP	1.089	1.79486	2.24503e-18	2.24238e-17	No-Deg
FCRLB	1.08864	2.47686	1.91667e-18	1.92917e-17	No-Deg
TSTD1	1.08838	6.67139	1.46158e-18	1.48464e-17	No-Deg
P2RY11	1.08791	2.8062	1.90334e-18	1.91709e-17	No-Deg
PDRG1	1.08561	5.11634	1.8665e-18	1.88132e-17	No-Deg
CERS5	1.08485	5.67684	1.94732e-18	1.95865e-17	No-Deg
MRPL55	1.0842	5.57152	2.05041e-18	2.05513e-17	No-Deg
LRRC27	1.08414	3.82619	2.24049e-18	2.2394e-17	No-Deg
TMEM219	1.08363	6.8358	2.0983e-18	2.10166e-17	No-Deg
RBP7	1.08354	3.65708	2.37993e-18	2.37381e-17	No-Deg
ILKAP	1.08332	4.50098	2.28068e-18	2.2764e-17	No-Deg
RABAC1	1.08314	6.9498	2.17585e-18	2.17783e-17	No-Deg
51617	1.08278	-0.324188	1.82027e-17	1.67584e-16	No-Deg
ADAMTS19	1.0822	0.73837	6.33834e-18	6.0771e-17	No-Deg
PIGC	1.08211	5.57954	2.40439e-18	2.39654e-17	No-Deg
NDUFA11	1.08102	6.38314	2.57424e-18	2.56228e-17	No-Deg
UFC1	1.08092	7.42674	2.56679e-18	2.55664e-17	No-Deg
COA6	1.08004	4.47557	2.93171e-18	2.91405e-17	No-Deg
LIME1	1.08	2.64341	3.56869e-18	3.50832e-17	No-Deg
NXNL2	1.07981	0.87139	6.92326e-18	6.60702e-17	No-Deg
CWC15	1.07962	5.19376	2.93633e-18	2.91662e-17	No-Deg
SNRPB2	1.07912	6.5228	2.96817e-18	2.94621e-17	No-Deg
TCEA2	1.07905	4.13187	3.22305e-18	3.18818e-17	No-Deg
CNIH4	1.07891	5.97336	3.04122e-18	3.01455e-17	No-Deg
SPINK8	1.07847	1.47275	5.60055e-18	5.42773e-17	No-Deg
H3F3A	1.07842	8.21852	3.09009e-18	3.05876e-17	No-Deg
BDH2	1.07793	4.84961	3.37891e-18	3.33087e-17	No-Deg
TOMM7	1.07683	6.39935	3.53645e-18	3.47901e-17	No-Deg
EXOSC1	1.07597	4.43243	3.9968e-18	3.92113e-17	No-Deg
GTF2F2	1.07524	4.38469	4.23625e-18	4.14754e-17	No-Deg
PDZRN4	1.07516	1.58286	6.86155e-18	6.55248e-17	No-Deg
LINC01089	1.0749	3.74643	4.54109e-18	4.43101e-17	No-Deg
ABCC12	1.07449	1.14897	8.76327e-18	8.2804e-17	No-Deg
CEBPA-AS1	1.07449	1.01667	9.41506e-18	8.87873e-17	No-Deg
TST	1.07387	4.74963	4.6138e-18	4.49877e-17	No-Deg
NDUFAF1	1.07375	4.13387	4.8092e-18	4.68294e-17	No-Deg
NUDT22	1.07293	4.33635	5.05322e-18	4.91388e-17	No-Deg
SYF2	1.07285	5.9011	4.81442e-18	4.68484e-17	No-Deg
LDLRAD2	1.07235	3.582	5.58656e-18	5.41783e-17	No-Deg
UQCRQ	1.07145	6.80351	5.28087e-18	5.1283e-17	No-Deg
ULK4	1.07118	2.23589	7.5431e-18	7.16046e-17	No-Deg
PTRH1	1.07099	3.60158	6.17556e-18	5.94087e-17	No-Deg
HABP2	1.07087	0.808254	1.39496e-17	1.29928e-16	No-Deg
NKAP	1.07086	4.16157	5.9686e-18	5.76496e-17	No-Deg
MYOZ1	1.07075	-0.0402201	2.9867e-17	2.69781e-16	No-Deg
ZSCAN16	1.07065	2.95683	6.83606e-18	6.53249e-17	No-Deg
STAP2	1.07029	5.00847	5.97934e-18	5.77145e-17	No-Deg
MRPS14	1.07024	4.61552	6.09539e-18	5.86769e-17	No-Deg
RPS19	1.07015	8.9183	5.75853e-18	5.56956e-17	No-Deg
MRPL33	1.07008	4.54835	6.19329e-18	5.95393e-17	No-Deg
DYNLRB1	1.06968	6.8829	6.02765e-18	5.80637e-17	No-Deg
79005	1.06946	4.94163	6.37973e-18	6.1127e-17	No-Deg
ROPN1B	1.06871	-0.485047	6.33926e-17	5.58548e-16	No-Deg
PMVK	1.06835	6.11401	6.72704e-18	6.43259e-17	No-Deg
NAT14	1.06776	4.59592	7.35229e-18	7.00248e-17	No-Deg
BGLAP	1.06764	1.038	1.54025e-17	1.42535e-16	No-Deg
MRPL48	1.06728	4.33316	7.72355e-18	7.32691e-17	No-Deg
ENDOG	1.06721	3.67944	8.13238e-18	7.70455e-17	No-Deg
MRPS5	1.06541	5.09998	8.58834e-18	8.13116e-17	No-Deg
NT5C3B	1.06486	4.96681	8.99231e-18	8.48564e-17	No-Deg
ARC	1.06332	1.78721	1.53486e-17	1.42128e-16	No-Deg
VAX2	1.06275	0.584119	2.9518e-17	2.66964e-16	No-Deg
ANAPC15	1.06272	4.69317	1.06649e-17	1.0018e-16	No-Deg
SUGT1	1.06264	4.8399	1.06651e-17	1.0018e-16	No-Deg
C19orf60	1.06241	4.36555	1.10911e-17	1.04046e-16	No-Deg
100288778	1.06192	4.63608	1.13496e-17	1.06263e-16	No-Deg
CDADC1	1.06046	2.26875	1.65826e-17	1.53258e-16	No-Deg
YBEY	1.06035	3.06384	1.44936e-17	1.34819e-16	No-Deg
HSPB1	1.06035	9.22837	1.19795e-17	1.12087e-16	No-Deg
MRPS15	1.06024	5.69559	1.24242e-17	1.16172e-16	No-Deg
SLC25A26	1.06	4.02764	1.35426e-17	1.26219e-16	No-Deg
EIF3M	1.05943	7.93059	1.28771e-17	1.20329e-16	No-Deg
NUDT13	1.05937	1.09744	2.73219e-17	2.47884e-16	No-Deg
TCEA3	1.05928	6.04008	1.32542e-17	1.23772e-16	No-Deg
729614	1.05881	2.01988	1.99354e-17	1.83148e-16	No-Deg
GAGE12D	1.0586	-0.668775	1.74988e-16	1.47222e-15	No-Deg
NAP1L5	1.0584	1.90874	2.1209e-17	1.94141e-16	No-Deg
TXNRD2	1.05801	4.39617	1.53464e-17	1.42128e-16	No-Deg
MAPK15	1.05783	3.49742	1.66198e-17	1.53503e-16	No-Deg
TMSB15A	1.05775	0.0384273	6.92571e-17	6.06866e-16	No-Deg
POLR2J	1.05772	5.52768	1.5045e-17	1.39858e-16	No-Deg
RNASET2	1.05731	6.18894	1.53043e-17	1.41901e-16	No-Deg
PFDN5	1.05727	7.73202	1.51351e-17	1.40514e-16	No-Deg
INAFM1	1.05698	3.87521	1.71261e-17	1.57875e-16	No-Deg
REEP6	1.05648	6.85173	1.61509e-17	1.49364e-16	No-Deg
JOSD2	1.05645	4.26463	1.73555e-17	1.59887e-16	No-Deg
AK1	1.05637	4.9603	1.6903e-17	1.55918e-16	No-Deg
SIRT4	1.05612	0.477088	5.17179e-17	4.58214e-16	No-Deg
TEN1-CDK3	1.05611	2.09445	2.3832e-17	2.17182e-16	No-Deg
UQCR10	1.05607	6.1264	1.68003e-17	1.55071e-16	No-Deg
RGS22	1.05577	3.18616	2.00176e-17	1.83704e-16	No-Deg
GTF2A2	1.05525	5.09707	1.82742e-17	1.68134e-16	No-Deg
IQCD	1.05518	1.57089	3.00607e-17	2.71188e-16	No-Deg
ENTPD8	1.05401	2.30304	2.64213e-17	2.39864e-16	No-Deg
MSRA	1.05369	2.93673	2.41223e-17	2.19688e-16	No-Deg
MTG1	1.05331	4.58824	2.15127e-17	1.9667e-16	No-Deg
RBFA	1.05317	4.34232	2.20007e-17	2.00876e-16	No-Deg
145783	1.05256	1.35033	3.97393e-17	3.54934e-16	No-Deg
DDIT3	1.05186	4.15302	2.44992e-17	2.22837e-16	No-Deg
ALG14	1.04905	3.4249	3.1921e-17	2.86889e-16	No-Deg
TRPT1	1.04877	4.24876	3.05657e-17	2.75571e-16	No-Deg
DNAJC19	1.04868	5.01552	2.9737e-17	2.68775e-16	No-Deg
PSMA3	1.04852	6.89412	2.90399e-17	2.62805e-16	No-Deg
NDUFB11	1.04814	6.31887	3.00495e-17	2.71188e-16	No-Deg
ZFAND2A	1.0475	3.79666	3.45918e-17	3.10117e-16	No-Deg
KPTN	1.04726	3.2132	3.7241e-17	3.3345e-16	No-Deg
MRPL24	1.04682	6.35073	3.30919e-17	2.97041e-16	No-Deg
ZP3	1.04651	3.36487	3.86865e-17	3.46177e-16	No-Deg
TAS2R20	1.04615	1.51095	5.91767e-17	5.22364e-16	No-Deg
MRPL28	1.04423	5.88742	4.02699e-17	3.59225e-16	No-Deg
MINOS1	1.04323	5.9309	4.32848e-17	3.85401e-16	No-Deg
RPL37	1.04314	8.92369	4.26187e-17	3.79706e-16	No-Deg
54758	1.04314	3.71209	4.78852e-17	4.25044e-16	No-Deg
ETFB	1.04287	5.44137	4.49062e-17	3.99342e-16	No-Deg
RPF1	1.04234	5.73786	4.63781e-17	4.11921e-16	No-Deg
ZNF789	1.04149	2.17764	6.76021e-17	5.93815e-16	No-Deg
STUM	1.04124	2.01659	7.17003e-17	6.27127e-16	No-Deg
EDF1	1.04113	7.79861	4.95333e-17	4.39402e-16	No-Deg
C21orf59	1.04095	5.5551	5.15196e-17	4.56739e-16	No-Deg
SS18L2	1.04074	4.23651	5.49542e-17	4.86287e-16	No-Deg
MALSU1	1.04022	4.03291	5.78009e-17	5.10533e-16	No-Deg
ADPRM	1.03998	2.55503	6.96833e-17	6.10229e-16	No-Deg
RIBC2	1.03961	1.342	1.01368e-16	8.73831e-16	No-Deg
DECR1	1.0395	6.24366	5.65313e-17	4.99626e-16	No-Deg
NDUFB7	1.03872	6.31107	5.97619e-17	5.27205e-16	No-Deg
SCGB1D2	1.03787	8.28095	6.26771e-17	5.52582e-16	No-Deg
ICA1	1.03696	5.72394	6.8602e-17	6.01861e-16	No-Deg
HSD11B1L	1.0367	2.87862	8.37245e-17	7.26101e-16	No-Deg
RPS20	1.0365	10.0091	6.89871e-17	6.0487e-16	No-Deg
C14orf80	1.03618	3.81696	7.86538e-17	6.85023e-16	No-Deg
FAM96A	1.03616	5.87469	7.24781e-17	6.33543e-16	No-Deg
PDCD5	1.03576	5.19155	7.58124e-17	6.6148e-16	No-Deg
GSTM4	1.03507	4.99776	8.01713e-17	6.97393e-16	No-Deg
ATP5O	1.03442	7.10457	8.09781e-17	7.03559e-16	No-Deg
RPL35	1.0344	8.34868	8.0548e-17	7.00245e-16	No-Deg
SVOPL	1.03435	0.0558077	3.515e-16	2.88786e-15	No-Deg
UFSP1	1.03424	0.667699	2.13079e-16	1.77913e-15	No-Deg
MRPS17	1.03412	4.01006	8.99925e-17	7.77641e-16	No-Deg
MTX1	1.03359	5.51155	8.79002e-17	7.60936e-16	No-Deg
PON3	1.0335	2.57892	1.10588e-16	9.49321e-16	No-Deg
SPDYA	1.033	0.970478	1.93801e-16	1.62763e-15	No-Deg
CXCL17	1.03231	4.15766	1.01605e-16	8.75353e-16	No-Deg
CHRDL2	1.03172	-1.39695	5.27737e-15	3.88043e-14	No-Deg
PPIL6	1.03161	1.46609	1.70464e-16	1.43584e-15	No-Deg
SWSAP1	1.0314	2.23476	1.3775e-16	1.17198e-15	No-Deg
54065	1.0312	4.12556	1.10266e-16	9.47125e-16	No-Deg
TMEM243	1.03113	4.26388	1.09937e-16	9.44868e-16	No-Deg
PRDX4	1.03102	6.38387	1.04196e-16	8.97133e-16	No-Deg
GRIA3	1.03058	0.313435	3.59493e-16	2.95183e-15	No-Deg
DENND6B	1.02984	3.32518	1.2969e-16	1.10736e-15	No-Deg
RPL31	1.02981	9.6542	1.11847e-16	9.5956e-16	No-Deg
LRRC75A-AS1	1.02951	8.10357	1.14693e-16	9.83384e-16	No-Deg
ATAD3B	1.02947	3.27161	1.33897e-16	1.14123e-15	No-Deg
RBX1	1.02939	5.63715	1.18626e-16	1.0159e-15	No-Deg
IFT27	1.02855	4.67336	1.29692e-16	1.10736e-15	No-Deg
ZNF503	1.02836	4.23044	1.3434e-16	1.14432e-15	No-Deg
AIDA	1.02781	6.75225	1.30745e-16	1.11568e-15	No-Deg
SLC25A14	1.02728	3.00691	1.61613e-16	1.36449e-15	No-Deg
ATPAF2	1.02644	4.10992	1.55277e-16	1.31564e-15	No-Deg
ZNF524	1.02639	4.03946	1.56476e-16	1.32501e-15	No-Deg
ITPA	1.02625	5.2286	1.50053e-16	1.27438e-15	No-Deg
MB	1.02617	4.66769	1.53877e-16	1.30532e-15	No-Deg
CCDC130	1.02561	4.14385	1.64336e-16	1.38585e-15	No-Deg
PMM2	1.02556	5.9687	1.55189e-16	1.31564e-15	No-Deg
FIS1	1.02519	6.26609	1.58578e-16	1.34202e-15	No-Deg
TTC1	1.02519	5.86838	1.59594e-16	1.34823e-15	No-Deg
FOLR1	1.02399	2.54436	2.19401e-16	1.82872e-15	No-Deg
DIO1	1.02285	3.66495	2.06957e-16	1.73205e-15	No-Deg
HIST1H2AE	1.0227	2.12215	2.62378e-16	2.17181e-15	No-Deg
PTRHD1	1.02241	3.94073	2.0926e-16	1.7503e-15	No-Deg
58515	1.02199	4.7561	2.0661e-16	1.73015e-15	No-Deg
NSMCE2	1.02188	4.24096	2.13233e-16	1.77938e-15	No-Deg
LYPD6B	1.02185	4.10287	2.15493e-16	1.79719e-15	No-Deg
CCNH	1.02134	5.36075	2.1239e-16	1.7744e-15	No-Deg
SDF2	1.02063	5.71709	2.21603e-16	1.846e-15	No-Deg
MRPL23	1.02043	5.35769	2.26557e-16	1.88618e-15	No-Deg
6231	1.02034	5.09493	2.29684e-16	1.90999e-15	No-Deg
ZNF165	1.01991	2.44384	2.98306e-16	2.45786e-15	No-Deg
CREB3L4	1.01935	7.11918	2.38509e-16	1.97995e-15	No-Deg
DPP7	1.01913	7.2158	2.42117e-16	2.00874e-15	No-Deg
NPDC1	1.01885	7.17516	2.47076e-16	2.04869e-15	No-Deg
COX5B	1.01879	6.31578	2.50088e-16	2.07127e-15	No-Deg
RPL14	1.01771	8.55803	2.66067e-16	2.20107e-15	No-Deg
DPY30	1.0176	5.25161	2.77892e-16	2.29757e-15	No-Deg
NARFL	1.0175	5.14731	2.80578e-16	2.31844e-15	No-Deg
UCHL3	1.01706	4.04548	3.03804e-16	2.50172e-15	No-Deg
ARRDC1-AS1	1.01671	2.51743	3.68607e-16	3.02148e-15	No-Deg
DCXR	1.01649	6.85045	2.92876e-16	2.41728e-15	No-Deg
CERKL	1.01616	1.74782	4.59708e-16	3.74047e-15	No-Deg
SNRPD2	1.01587	7.04953	3.05497e-16	2.51422e-15	No-Deg
GEMIN6	1.01576	3.60347	3.43857e-16	2.82668e-15	No-Deg
LRRC73	1.01575	1.81558	4.63675e-16	3.76848e-15	No-Deg
CHMP2A	1.01478	6.808	3.30672e-16	2.71985e-15	No-Deg
LINC01144	1.01473	0.275173	1.10591e-15	8.68331e-15	No-Deg
SLC25A33	1.01326	2.99549	4.36913e-16	3.55903e-15	No-Deg
KRT19	1.01326	10.464	3.63653e-16	2.98258e-15	No-Deg
CSN3	1.01305	-1.8904	8.0981e-14	5.27848e-13	No-Deg
FAM178B	1.01286	1.16633	7.19495e-16	5.74355e-15	No-Deg
HRASLS2	1.01272	2.47393	4.91662e-16	3.98916e-15	No-Deg
D2HGDH	1.01224	4.65367	4.13999e-16	3.38005e-15	No-Deg
CFD	1.01207	5.81109	4.05533e-16	3.31659e-15	No-Deg
ECI2	1.01197	5.95599	4.07369e-16	3.32971e-15	No-Deg
DEGS2	1.01115	6.96556	4.26706e-16	3.47983e-15	No-Deg
51256	1.01006	4.00685	4.98548e-16	4.04046e-15	No-Deg
ACY3	1.00978	-0.105139	2.22611e-15	1.70135e-14	No-Deg
CLTA	1.00921	6.85579	4.89558e-16	3.97433e-15	No-Deg
ADIRF	1.0084	7.47116	5.15931e-16	4.17663e-15	No-Deg
JTB	1.00838	7.37301	5.16899e-16	4.18211e-15	No-Deg
CHKA	1.00828	5.00976	5.39965e-16	4.36135e-15	No-Deg
PVALB	1.00793	3.41787	6.06083e-16	4.87618e-15	No-Deg
SPAG17	1.0078	2.4723	6.93344e-16	5.54714e-15	No-Deg
STYXL1	1.0071	5.19378	5.83135e-16	4.7021e-15	No-Deg
MED10	1.00689	4.37928	6.09713e-16	4.90264e-15	No-Deg
PDZK1IP1	1.00683	4.40837	6.11513e-16	4.91436e-15	No-Deg
SLC9A5	1.00567	0.114014	2.35598e-15	1.79583e-14	No-Deg
C2orf76	1.0054	1.94869	9.1861e-16	7.25237e-15	No-Deg
EXOSC9	1.00537	4.46671	6.75678e-16	5.40882e-15	No-Deg
CIR1	1.00522	6.04888	6.53688e-16	5.23571e-15	No-Deg
RSL24D1	1.00521	7.30507	6.4575e-16	5.17791e-15	No-Deg
TPTEP1	1.00503	3.22332	7.56429e-16	6.00499e-15	No-Deg
SIL1	1.00433	5.86477	6.97555e-16	5.57772e-15	No-Deg
SLC25A35	1.00408	3.59594	7.80208e-16	6.17668e-15	No-Deg
IER2	1.00388	7.26773	7.08567e-16	5.65947e-15	No-Deg
SKAP1	1.00385	3.99782	7.70315e-16	6.10847e-15	No-Deg
GSTM3	1.00336	7.11898	7.35853e-16	5.8546e-15	No-Deg
KRT13	1.00335	3.35888	8.3905e-16	6.63155e-15	No-Deg
CAMK2B	1.00299	2.38029	9.85134e-16	7.76476e-15	No-Deg
NDUFB8	1.00277	5.81157	7.7851e-16	6.16664e-15	No-Deg
29990	1.00226	5.62593	8.09601e-16	6.40231e-15	No-Deg
PIH1D2	1.00121	2.18803	1.15926e-15	9.08728e-15	No-Deg
CIB2	1.00051	1.82137	1.33222e-15	1.03864e-14	No-Deg
CNPY2	1.00051	6.24049	9.05179e-16	7.15026e-15	No-Deg
TMEM116	1.00048	3.54081	1.00683e-15	7.92708e-15	No-Deg
ZNF579	1.00045	3.59089	1.00489e-15	7.91612e-15	No-Deg
131616	0.99923	3.0762	1.15031e-15	9.0221e-15	No-Deg
CLDN9	0.998948	-0.102972	4.57292e-15	3.385e-14	No-Deg
SYNPO2L	0.998451	2.09934	1.43e-15	1.11306e-14	No-Deg
SLC5A8	0.998393	2.80662	1.26206e-15	9.85543e-15	No-Deg
C16orf46	0.998364	1.53649	1.68587e-15	1.30093e-14	No-Deg
F7	0.9983	3.16372	1.21459e-15	9.49511e-15	No-Deg
LINC01011	0.99825	1.98312	1.49087e-15	1.15792e-14	No-Deg
PFDN2	0.997958	5.38615	1.09743e-15	8.62617e-15	No-Deg
CDK5	0.997554	4.17327	1.18046e-15	9.24848e-15	No-Deg
ZNF133	0.997159	4.03538	1.22278e-15	9.5539e-15	No-Deg
PFDN4	0.997067	4.78682	1.18798e-15	9.29719e-15	No-Deg
TXN	0.996482	7.33477	1.18539e-15	9.28204e-15	No-Deg
CHI3L2	0.996213	4.29287	1.28706e-15	1.00398e-14	No-Deg
C9orf66	0.996188	0.581275	3.09419e-15	2.3264e-14	No-Deg
RAD51B	0.994772	1.93277	1.91635e-15	1.47324e-14	No-Deg
SNRPC	0.994247	5.9482	1.40338e-15	1.09339e-14	No-Deg
LIN37	0.994145	2.86558	1.67709e-15	1.29485e-14	No-Deg
MRM3	0.993868	3.96616	1.54123e-15	1.19575e-14	No-Deg
UQCRH	0.99376	6.13442	1.44729e-15	1.12591e-14	No-Deg
MRPL40	0.99375	5.10005	1.4792e-15	1.14948e-14	No-Deg
GAR1	0.993519	4.29733	1.54979e-15	1.20109e-14	No-Deg
SPCS2	0.993243	5.56737	1.51448e-15	1.17562e-14	No-Deg
NOSIP	0.992971	5.49468	1.5455e-15	1.19841e-14	No-Deg
ECHDC2	0.992129	5.01816	1.65801e-15	1.2815e-14	No-Deg
CABYR	0.991971	2.9455	1.92668e-15	1.48039e-14	No-Deg
ITPKA	0.991885	0.764673	3.69388e-15	2.75134e-14	No-Deg
BBS5	0.991353	4.10065	1.81778e-15	1.39971e-14	No-Deg
C19orf73	0.991198	0.144675	6.01852e-15	4.39165e-14	No-Deg
UROS	0.991068	5.17757	1.77554e-15	1.36792e-14	No-Deg
ZFAND2B	0.990553	4.34119	1.89653e-15	1.45878e-14	No-Deg
LINC01139	0.990508	0.199439	6.01121e-15	4.38855e-14	No-Deg
ZNF653	0.990064	2.11536	2.52915e-15	1.91562e-14	No-Deg
RP9	0.989884	3.04709	2.19541e-15	1.67878e-14	No-Deg
NSUN5P2	0.989743	3.51516	2.11498e-15	1.61814e-14	No-Deg
PPIE	0.98881	5.20443	2.072e-15	1.5878e-14	No-Deg
TXNL4A	0.988789	5.6166	2.0555e-15	1.576e-14	No-Deg
ANAPC11	0.988705	6.25264	2.04645e-15	1.5699e-14	No-Deg
SMYD3	0.98867	4.90826	2.11019e-15	1.61534e-14	No-Deg
EFCC1	0.988277	3.34994	2.37317e-15	1.80605e-14	No-Deg
CMC2	0.987844	3.88501	2.34284e-15	1.7877e-14	No-Deg
GMNN	0.987825	3.75629	2.36674e-15	1.80212e-14	No-Deg
81691	0.987822	2.8819	2.57984e-15	1.95298e-14	No-Deg
FAM189A2	0.987636	3.41913	2.46344e-15	1.87177e-14	No-Deg
TMEM261	0.987023	5.02219	2.35398e-15	1.79526e-14	No-Deg
PLPP5	0.986795	6.07064	2.33858e-15	1.78541e-14	No-Deg
FAM50A	0.986653	5.99841	2.36401e-15	1.80099e-14	No-Deg
CKLF	0.986617	4.17875	2.50395e-15	1.89953e-14	No-Deg
TRAPPC1	0.98659	5.95139	2.3758e-15	1.8071e-14	No-Deg
ZNF404	0.98548	1.87236	3.6622e-15	2.72916e-14	No-Deg
CDK10	0.985357	4.74858	2.66169e-15	2.00964e-14	No-Deg
ALKBH7	0.985333	5.38595	2.61719e-15	1.97916e-14	No-Deg
CDK7	0.985152	5.37143	2.65082e-15	2.00248e-14	No-Deg
LYSMD4	0.984833	2.70245	3.24199e-15	2.43243e-14	No-Deg
IFT20	0.984649	4.48073	2.8231e-15	2.12703e-14	No-Deg
IL18	0.984408	4.11592	2.92163e-15	2.20011e-14	No-Deg
LSM6	0.983688	3.06643	3.34186e-15	2.50343e-14	No-Deg
PRR7	0.983066	1.51914	4.78568e-15	3.53338e-14	No-Deg
DOK7	0.982984	3.68612	3.30935e-15	2.48037e-14	No-Deg
ILF3-AS1	0.982856	4.40517	3.20055e-15	2.40384e-14	No-Deg
C4orf47	0.982759	0.922321	6.24903e-15	4.55522e-14	No-Deg
RGS10	0.982636	5.4676	3.14031e-15	2.35984e-14	No-Deg
100132288	0.982091	3.74046	3.50245e-15	2.61826e-14	No-Deg
FAM216A	0.981442	1.20712	5.99179e-15	4.3766e-14	No-Deg
SCNN1B	0.981392	3.9658	3.61862e-15	2.69948e-14	No-Deg
POLR2L	0.981345	6.7975	3.36525e-15	2.51964e-14	No-Deg
RSRP1	0.981006	4.41904	3.62738e-15	2.70461e-14	No-Deg
AURKAIP1	0.981002	6.42428	3.45736e-15	2.5859e-14	No-Deg
199223	0.980869	2.73671	4.22005e-15	3.13187e-14	No-Deg
OARD1	0.979524	4.35769	4.02244e-15	2.98986e-14	No-Deg
GPR35	0.97932	0.509292	9.97546e-15	7.12327e-14	No-Deg
MITD1	0.978764	3.95147	4.32822e-15	3.21049e-14	No-Deg
KCNIP3	0.978549	1.95278	5.72349e-15	4.19129e-14	No-Deg
CBWD1	0.978432	5.92597	4.14389e-15	3.07853e-14	No-Deg
INO80C	0.978162	3.45188	4.67601e-15	3.45596e-14	No-Deg
ZMAT1	0.977513	4.23672	4.63652e-15	3.42854e-14	No-Deg
RNF208	0.977089	3.26055	5.11732e-15	3.77048e-14	No-Deg
EVA1C	0.976924	4.03365	4.87781e-15	3.59955e-14	No-Deg
EGFL7	0.976756	5.40671	4.68757e-15	3.46272e-14	No-Deg
RNF32	0.976232	0.835977	1.00756e-14	7.18766e-14	No-Deg
CDA	0.976229	0.906764	9.71681e-15	6.94203e-14	No-Deg
HDDC2	0.976035	5.21855	4.94416e-15	3.64476e-14	No-Deg
DTNBP1	0.975895	4.33367	5.14785e-15	3.78908e-14	No-Deg
DYNLT1	0.975744	6.33281	4.94389e-15	3.64476e-14	No-Deg
GDF5	0.975695	-1.96251	9.17642e-13	5.39349e-12	No-Deg
ATP1A1-AS1	0.975462	2.209	6.64809e-15	4.83874e-14	No-Deg
SLC26A9	0.97541	-1.85634	6.46949e-13	3.86431e-12	No-Deg
10901	0.975185	5.14848	5.24565e-15	3.85909e-14	No-Deg
C11orf70	0.975178	1.864	7.33471e-15	5.31156e-14	No-Deg
CYP2B7P	0.97512	7.01139	5.12453e-15	3.77385e-14	No-Deg
IL17RE	0.975022	4.07143	5.53411e-15	4.06089e-14	No-Deg
HMGN5	0.974881	2.78279	6.27754e-15	4.57368e-14	No-Deg
NDUFS7	0.97469	5.54987	5.37404e-15	3.94747e-14	No-Deg
BEX5	0.974239	1.70709	8.15091e-15	5.86375e-14	No-Deg
ARL3	0.97274	5.5864	6.12469e-15	4.46685e-14	No-Deg
CETP	0.970855	0.61328	1.62777e-14	1.1314e-13	No-Deg
ITGB3BP	0.970787	4.0044	7.38595e-15	5.34597e-14	No-Deg
C19orf53	0.970714	6.19328	6.95189e-15	5.04962e-14	No-Deg
LAMTOR5	0.970551	5.82605	7.06587e-15	5.12463e-14	No-Deg
PSMD4	0.970379	7.39794	7.03651e-15	5.10592e-14	No-Deg
RPAIN	0.97029	4.6344	7.41348e-15	5.36319e-14	No-Deg
NQO2	0.969754	4.78189	7.64448e-15	5.52474e-14	No-Deg
PHKG2	0.969596	5.09074	7.65367e-15	5.52859e-14	No-Deg
4728	0.969008	6.58493	7.76177e-15	5.60346e-14	No-Deg
GGCT	0.968807	6.84123	7.84943e-15	5.66145e-14	No-Deg
UPP1	0.968463	3.0695	9.31232e-15	6.66299e-14	No-Deg
DYNC2LI1	0.968142	4.93039	8.47615e-15	6.08595e-14	No-Deg
HINT2	0.96804	4.78928	8.57304e-15	6.14937e-14	No-Deg
RFC4	0.967668	4.02352	9.09157e-15	6.50829e-14	No-Deg
HIST1H3H	0.967561	0.968754	1.66846e-14	1.15688e-13	No-Deg
NRGN	0.967395	1.38499	1.42204e-14	9.96125e-14	No-Deg
MLPH	0.967318	8.2998	8.60881e-15	6.17194e-14	No-Deg
ADCY10P1	0.967296	0.597517	2.07285e-14	1.42352e-13	No-Deg
CISD1	0.967213	3.84046	9.47706e-15	6.77411e-14	No-Deg
UBE2F	0.967126	5.15767	9.01489e-15	6.45662e-14	No-Deg
SNAP25	0.966236	0.537445	2.30592e-14	1.57829e-13	No-Deg
RPL36AL	0.966166	7.20004	9.34429e-15	6.68254e-14	No-Deg
OPRPN	0.966151	2.1526	1.25069e-14	8.79961e-14	No-Deg
SLPI	0.965676	4.73457	1.00589e-14	7.17931e-14	No-Deg
MRPL32	0.965309	5.36619	1.01274e-14	7.22103e-14	No-Deg
MTIF3	0.965254	5.29535	1.01811e-14	7.25554e-14	No-Deg
RDH16	0.964929	2.11458	1.36707e-14	9.58808e-14	No-Deg
RPS24	0.963609	10.048	1.09984e-14	7.79553e-14	No-Deg
C16orf86	0.963456	0.675528	2.54047e-14	1.73222e-13	No-Deg
CASC1	0.963068	2.40772	1.46137e-14	1.02267e-13	No-Deg
CCNB1IP1	0.962619	4.48091	1.245e-14	8.76383e-14	No-Deg
NTPCR	0.96243	5.12259	1.23424e-14	8.70092e-14	No-Deg
HSPBAP1	0.962421	2.64013	1.46987e-14	1.02812e-13	No-Deg
COL28A1	0.962279	-0.152708	5.19176e-14	3.45307e-13	No-Deg
ACTL10	0.962003	1.73964	1.81522e-14	1.2544e-13	No-Deg
SCCPDH	0.961907	7.43058	1.23986e-14	8.73196e-14	No-Deg
CHKB	0.961766	3.71979	1.37287e-14	9.6215e-14	No-Deg
ZMAT5	0.961635	3.98553	1.36179e-14	9.55783e-14	No-Deg
TMEM141	0.96152	6.16007	1.28605e-14	9.03954e-14	No-Deg
PCDH9	0.961174	-0.450098	7.77378e-14	5.08323e-13	No-Deg
LINC00174	0.960025	3.11153	1.62359e-14	1.12904e-13	No-Deg
NUDCD2	0.959645	4.22872	1.53388e-14	1.07029e-13	No-Deg
SERPINA1	0.95947	8.00738	1.45416e-14	1.01812e-13	No-Deg
DHRS12	0.958945	3.84358	1.64145e-14	1.1398e-13	No-Deg
DRAP1	0.958862	6.32035	1.53124e-14	1.06896e-13	No-Deg
ABRACL	0.958858	5.16058	1.56298e-14	1.08848e-13	No-Deg
NPY1R	0.958784	8.87868	1.51834e-14	1.06047e-13	No-Deg
UQCR11	0.958716	6.20959	1.5482e-14	1.0787e-13	No-Deg
MORC2-AS1	0.95865	2.91292	1.81818e-14	1.25584e-13	No-Deg
HEBP1	0.958508	6.54913	1.56385e-14	1.08855e-13	No-Deg
LRRC23	0.958501	3.46703	1.73702e-14	1.20151e-13	No-Deg
CRYZL1	0.958296	3.67676	1.73264e-14	1.19906e-13	No-Deg
CYB5D2	0.95816	4.60464	1.66536e-14	1.15529e-13	No-Deg
SAA1	0.957685	5.45057	1.67807e-14	1.16298e-13	No-Deg
MED30	0.957638	2.89614	1.94756e-14	1.34069e-13	No-Deg
RPS7	0.956393	7.96902	1.78319e-14	1.23286e-13	No-Deg
RPS27	0.956334	5.25302	1.84283e-14	1.27164e-13	No-Deg
FAAH2	0.956319	3.87211	1.9488e-14	1.3409e-13	No-Deg
MED11	0.956195	3.41227	2.03154e-14	1.39582e-13	No-Deg
NFATC4	0.95602	5.95108	1.857e-14	1.28019e-13	No-Deg
ZCRB1	0.955601	6.16749	1.90351e-14	1.31162e-13	No-Deg
SERF2	0.955202	8.59415	1.92569e-14	1.32627e-13	No-Deg
SEZ6L	0.954155	0.856445	4.20914e-14	2.82439e-13	No-Deg
TREX1	0.953807	4.22384	2.2556e-14	1.54459e-13	No-Deg
CRIPAK	0.953337	3.59744	2.41582e-14	1.65116e-13	No-Deg
COX4I1	0.953026	7.54783	2.23079e-14	1.52979e-13	No-Deg
COA3	0.952668	5.78262	2.32229e-14	1.58874e-13	No-Deg
ZNF177	0.952655	1.70901	3.37189e-14	2.27964e-13	No-Deg
ABCC8	0.952642	3.30087	2.59107e-14	1.76505e-13	No-Deg
DPH7	0.952389	3.89663	2.51996e-14	1.71988e-13	No-Deg
PPCDC	0.951059	3.14886	2.91622e-14	1.9809e-13	No-Deg
PHPT1	0.95099	6.35953	2.57308e-14	1.75363e-13	No-Deg
CRIP2	0.950513	8.33511	2.62405e-14	1.78667e-13	No-Deg
LCAT	0.950419	0.976534	5.05593e-14	3.36898e-13	No-Deg
IFT46	0.950113	5.07818	2.78738e-14	1.89608e-13	No-Deg
MRPL1	0.950021	4.62358	2.844e-14	1.93276e-13	No-Deg
654342	0.949659	3.76126	3.03913e-14	2.06049e-13	No-Deg
C14orf28	0.949613	2.07119	3.76445e-14	2.53549e-13	No-Deg
EMC3	0.94949	6.23326	2.84322e-14	1.93276e-13	No-Deg
EIF2S2	0.948629	7.16605	2.98402e-14	2.02504e-13	No-Deg
CYSRT1	0.948537	0.834105	6.10362e-14	4.0427e-13	No-Deg
AIG1	0.948289	5.30231	3.12388e-14	2.11596e-13	No-Deg
GPAT2	0.947974	2.19021	4.08723e-14	2.74644e-13	No-Deg
COX6B1	0.947624	7.12136	3.18771e-14	2.15817e-13	No-Deg
PPOX	0.947124	4.12507	3.5119e-14	2.37206e-13	No-Deg
SHC2	0.946676	4.77479	3.52131e-14	2.3773e-13	No-Deg
PINX1	0.946544	2.45171	4.28084e-14	2.86982e-13	No-Deg
RABGGTB	0.946248	5.62641	3.54657e-14	2.3921e-13	No-Deg
124923	0.946057	1.57939	5.36095e-14	3.5623e-13	No-Deg
SULT1A3	0.945942	4.9306	3.67643e-14	2.47852e-13	No-Deg
DCDC2	0.94519	3.15693	4.27141e-14	2.86484e-13	No-Deg
LINC00476	0.945024	2.1084	5.02828e-14	3.35367e-13	No-Deg
HPF1	0.944671	4.7575	4.01509e-14	2.7005e-13	No-Deg
ZC2HC1C	0.944502	1.53462	6.00468e-14	3.98268e-13	No-Deg
SUB1	0.944183	8.1489	3.97227e-14	2.67295e-13	No-Deg
MT1L	0.943537	0.540035	9.85695e-14	6.38722e-13	No-Deg
CCT6B	0.943094	2.71732	5.14749e-14	3.42681e-13	No-Deg
TIMM10	0.942602	4.63177	4.61309e-14	3.08679e-13	No-Deg
DUT	0.942492	5.57249	4.53402e-14	3.03671e-13	No-Deg
RASL11A	0.942453	2.69232	5.38302e-14	3.57531e-13	No-Deg
HMGN3	0.942214	5.4616	4.62632e-14	3.09276e-13	No-Deg
LSMEM1	0.942059	1.23657	7.762e-14	5.08016e-13	No-Deg
PRDX5	0.941978	7.00881	4.60988e-14	3.08608e-13	No-Deg
LAGE3	0.941053	5.12007	5.02699e-14	3.35367e-13	No-Deg
SFT2D1	0.940936	4.51849	5.16103e-14	3.43423e-13	No-Deg
AQP3	0.940806	6.60066	4.99065e-14	3.33167e-13	No-Deg
KBTBD3	0.940509	2.22984	6.56891e-14	4.33687e-13	No-Deg
TEX30	0.939712	2.23609	6.90628e-14	4.54705e-13	No-Deg
TXNL1	0.939511	6.83988	5.41693e-14	3.59617e-13	No-Deg
METTL25	0.939322	1.85568	7.67434e-14	5.02738e-13	No-Deg
GRK4	0.939121	1.53399	8.47673e-14	5.51525e-13	No-Deg
MMP24	0.938735	3.66666	6.21919e-14	4.11545e-13	No-Deg
CDKN2AIPNL	0.938591	4.41927	6.03046e-14	3.99793e-13	No-Deg
NOL12	0.937755	3.52545	6.69274e-14	4.41253e-13	No-Deg
TSEN2	0.937657	2.98035	7.0799e-14	4.65709e-13	No-Deg
CENPH	0.937324	3.82561	6.74198e-14	4.44092e-13	No-Deg
653635	0.937105	5.75328	6.40737e-14	4.23607e-13	No-Deg
PSMG2	0.936617	5.69632	6.61854e-14	4.36562e-13	No-Deg
B9D2	0.936518	1.95369	8.97543e-14	5.82915e-13	No-Deg
CKS2	0.935744	4.83623	7.14052e-14	4.69267e-13	No-Deg
ABHD12B	0.935304	0.0638679	2.30859e-13	1.44949e-12	No-Deg
GABARAP	0.935078	8.15892	7.16695e-14	4.70573e-13	No-Deg
FAM57B	0.934381	-0.0482082	2.68873e-13	1.67715e-12	No-Deg
TMEM126B	0.93421	5.10638	7.8234e-14	5.11336e-13	No-Deg
ELOF1	0.934179	5.52621	7.7678e-14	5.08164e-13	No-Deg
ZNHIT3	0.934121	5.01822	7.88611e-14	5.14731e-13	No-Deg
TMA7	0.933867	5.9837	7.86754e-14	5.13986e-13	No-Deg
S100P	0.933841	5.88852	7.89128e-14	5.14834e-13	No-Deg
ENSA	0.933594	8.26315	7.88315e-14	5.14731e-13	No-Deg
NIT2	0.932873	5.56142	8.4428e-14	5.49567e-13	No-Deg
CHCHD6	0.93229	2.87625	1.01053e-13	6.52165e-13	No-Deg
C19orf24	0.931988	5.3753	8.96845e-14	5.82726e-13	No-Deg
PITHD1	0.931864	5.52554	9.01391e-14	5.8515e-13	No-Deg
C16orf89	0.931766	3.6123	9.76975e-14	6.33643e-13	No-Deg
FAM83E	0.931594	3.60099	9.88559e-14	6.4e-13	No-Deg
CRABP1	0.931314	3.71735	9.98522e-14	6.45285e-13	No-Deg
LRRC24	0.930557	0.193618	2.7966e-13	1.74142e-12	No-Deg
ECI1	0.930311	6.31586	9.84518e-14	6.38247e-13	No-Deg
55111	0.930279	5.19085	1.00476e-13	6.49022e-13	No-Deg
PSMB3	0.930048	6.88207	9.96254e-14	6.4411e-13	No-Deg
STUB1	0.929579	6.7099	1.02796e-13	6.63116e-13	No-Deg
RHOD	0.929396	4.95807	1.06942e-13	6.88312e-13	No-Deg
COPS5	0.92924	6.84263	1.04945e-13	6.76368e-13	No-Deg
PYM1	0.92916	4.96763	1.08542e-13	6.983e-13	No-Deg
PSMA5	0.929139	6.57011	1.05865e-13	6.81992e-13	No-Deg
GSTO1	0.929124	6.05914	1.06547e-13	6.86079e-13	No-Deg
PABPN1	0.928557	6.79856	1.09666e-13	7.05213e-13	No-Deg
HMGCLL1	0.927995	0.716295	2.36896e-13	1.48479e-12	No-Deg
CAPN3	0.927815	1.97034	1.55464e-13	9.91279e-13	No-Deg
FABP4	0.92706	7.58588	1.20117e-13	7.70692e-13	No-Deg
HSH2D	0.92697	4.24429	1.28043e-13	8.20447e-13	No-Deg
RPLP2	0.925851	8.591	1.29331e-13	8.27958e-13	No-Deg
LRP5L	0.925469	1.83645	1.8579e-13	1.17577e-12	No-Deg
LRP2BP	0.92514	0.74927	2.78051e-13	1.7329e-12	No-Deg
DMAP1	0.925066	4.71704	1.41961e-13	9.07601e-13	No-Deg
PARK7	0.924923	7.54152	1.37675e-13	8.80984e-13	No-Deg
PTMS	0.924477	8.38249	1.41235e-13	9.03363e-13	No-Deg
MEG3	0.923135	2.08266	2.04008e-13	1.28539e-12	No-Deg
PFKFB1	0.92274	0.619105	3.4532e-13	2.11861e-12	No-Deg
SERPINA11	0.922537	4.26699	1.69519e-13	1.0785e-12	No-Deg
NUP62CL	0.922404	0.359791	4.11502e-13	2.50904e-12	No-Deg
CCDC152	0.922355	2.74874	1.92805e-13	1.21748e-12	No-Deg
BOLA3	0.922116	3.75272	1.78855e-13	1.13438e-12	No-Deg
INA	0.922087	-0.437152	8.36989e-13	4.94171e-12	No-Deg
SAA2	0.9219	3.89296	1.79807e-13	1.13992e-12	No-Deg
NGEF	0.92087	2.23083	2.28757e-13	1.43692e-12	No-Deg
COMMD7	0.920004	6.21005	1.89984e-13	1.20125e-12	No-Deg
CBY1	0.919641	4.90831	1.99082e-13	1.2549e-12	No-Deg
C1orf21	0.919324	7.23124	1.96709e-13	1.24104e-12	No-Deg
LINC00893	0.919112	1.35234	3.16454e-13	1.95022e-12	No-Deg
LYRM4	0.918695	4.27877	2.16004e-13	1.35859e-12	No-Deg
NDUFA8	0.917624	5.54612	2.22906e-13	1.40139e-12	No-Deg
AP4S1	0.917159	1.75592	3.18725e-13	1.96337e-12	No-Deg
WDR74	0.916955	4.78401	2.36685e-13	1.48411e-12	No-Deg
IDI2	0.916955	2.00907	3.04963e-13	1.88345e-12	No-Deg
MPG	0.916887	6.03499	2.31788e-13	1.45404e-12	No-Deg
ADHFE1	0.916457	2.24036	3.01079e-13	1.86106e-12	No-Deg
CLGN	0.915788	5.16659	2.52165e-13	1.57567e-12	No-Deg
GARNL3	0.91557	2.80098	2.93398e-13	1.81907e-12	No-Deg
CENPM	0.915534	2.84297	2.92631e-13	1.81588e-12	No-Deg
RPS9	0.915499	9.14688	2.48926e-13	1.55611e-12	No-Deg
EEF1AKMT1	0.915376	3.01008	2.90225e-13	1.80329e-12	No-Deg
UBXN8	0.915364	2.85047	2.95509e-13	1.83136e-12	No-Deg
IQCA1	0.915332	2.5912	3.0587e-13	1.88742e-12	No-Deg
HIGD2A	0.915014	5.61156	2.62418e-13	1.63903e-12	No-Deg
SUMO1	0.914757	7.06931	2.62586e-13	1.63936e-12	No-Deg
ATP5J2	0.914361	6.13393	2.71398e-13	1.69217e-12	No-Deg
TVP23C	0.914303	3.49912	2.97484e-13	1.84122e-12	No-Deg
PMF1	0.914083	5.56411	2.78447e-13	1.73462e-12	No-Deg
TFDP2	0.913809	3.70804	3.02522e-13	1.86918e-12	No-Deg
NSMCE4A	0.913741	4.6776	2.90602e-13	1.80485e-12	No-Deg
RRP1	0.913626	4.77121	2.91859e-13	1.81188e-12	No-Deg
LSM1	0.91292	5.4093	3.00364e-13	1.85744e-12	No-Deg
FBP1	0.912898	6.63427	2.96023e-13	1.83296e-12	No-Deg
TTC28-AS1	0.912765	3.19315	3.35733e-13	2.06195e-12	No-Deg
HOXB6	0.912512	3.38978	3.35523e-13	2.06154e-12	No-Deg
SUCLG1	0.912486	6.13501	3.05282e-13	1.88461e-12	No-Deg
POLR2F	0.912245	4.52863	3.20766e-13	1.97425e-12	No-Deg
CELF6	0.911999	0.678657	6.46969e-13	3.86431e-12	No-Deg
GCAT	0.911994	3.82645	3.36482e-13	2.06566e-12	No-Deg
GDAP1	0.910765	4.73629	3.49466e-13	2.14171e-12	No-Deg
LINC00689	0.910604	0.137131	9.83516e-13	5.7524e-12	No-Deg
NUPL2	0.910411	3.92939	3.69324e-13	2.25955e-12	No-Deg
GALNT14	0.909865	2.77073	4.20242e-13	2.56125e-12	No-Deg
C1orf64	0.909312	5.11061	3.78826e-13	2.3167e-12	No-Deg
RAB4B	0.908601	4.71689	4.00236e-13	2.44346e-12	No-Deg
TMBIM4	0.908287	6.94776	3.94076e-13	2.40791e-12	No-Deg
EXOSC7	0.908171	4.77772	4.1034e-13	2.50302e-12	No-Deg
RWDD2B	0.907951	4.28255	4.23333e-13	2.57899e-12	No-Deg
CLYBL	0.907745	2.21713	5.1932e-13	3.13317e-12	No-Deg
ENKD1	0.90773	3.89173	4.37301e-13	2.66069e-12	No-Deg
RNF25	0.90678	4.48337	4.51788e-13	2.74651e-12	No-Deg
ATP5H	0.905752	7.07946	4.61077e-13	2.79942e-12	No-Deg
TOMM6	0.9056	6.69938	4.66673e-13	2.8322e-12	No-Deg
RAMP2	0.905229	4.94948	4.90372e-13	2.971e-12	No-Deg
MRPL27	0.90522	5.65797	4.83517e-13	2.93071e-12	No-Deg
SEC11C	0.90494	5.67332	4.91879e-13	2.97888e-12	No-Deg
INO80E	0.904658	5.29787	5.03955e-13	3.04815e-12	No-Deg
SERPINB6	0.904275	6.80453	5.06309e-13	3.06033e-12	No-Deg
STEAP1	0.904115	3.46514	5.62169e-13	3.38315e-12	No-Deg
ZNF837	0.903405	1.2036	8.7435e-13	5.1517e-12	No-Deg
SLC25A16	0.902752	3.78739	5.98863e-13	3.59493e-12	No-Deg
NAA10	0.902738	5.42768	5.66214e-13	3.40606e-12	No-Deg
PPP1R7	0.901895	5.91733	5.91936e-13	3.55483e-12	No-Deg
FMO5	0.901839	4.06328	6.24418e-13	3.74051e-12	No-Deg
LYRM5	0.901585	3.64906	6.4904e-13	3.87507e-12	No-Deg
LRRC29	0.901473	1.37378	9.30061e-13	5.45978e-12	No-Deg
MGST3	0.901449	6.58518	6.04177e-13	3.62531e-12	No-Deg
PMS2P3	0.901351	1.55897	8.88177e-13	5.22888e-12	No-Deg
YPEL3	0.901171	5.83125	6.1977e-13	3.71733e-12	No-Deg
C19orf43	0.900948	6.61951	6.23008e-13	3.73519e-12	No-Deg
PSMA2	0.900888	7.06931	6.23391e-13	3.73592e-12	No-Deg
FH	0.900827	6.55391	6.28018e-13	3.76051e-12	No-Deg
EMC7	0.900653	5.78545	6.40339e-13	3.8279e-12	No-Deg
C14orf93	0.900649	3.56703	6.91283e-13	4.11018e-12	No-Deg
MFF	0.900333	5.86177	6.52393e-13	3.89185e-12	No-Deg
C7orf50	0.899703	6.28393	6.74855e-13	4.02084e-12	No-Deg
C3orf62	0.898929	2.82296	8.20262e-13	4.84694e-12	No-Deg
RABEP2	0.898862	5.44885	7.19045e-13	4.26994e-12	No-Deg
GLDC	0.898499	1.99595	9.54613e-13	5.59705e-12	No-Deg
DNPH1	0.898285	4.68477	7.58844e-13	4.5007e-12	No-Deg
C15orf59	0.897611	1.59566	1.10429e-12	6.42214e-12	No-Deg
MRPL51	0.897348	6.42842	7.79151e-13	4.61923e-12	No-Deg
GLS2	0.897127	2.2625	9.88862e-13	5.77897e-12	No-Deg
C11orf49	0.897033	4.83722	8.15912e-13	4.8272e-12	No-Deg
CCDC7	0.896903	1.00031	1.39739e-12	8.05815e-12	No-Deg
C20orf96	0.896774	4.36754	8.41799e-13	4.96613e-12	No-Deg
NOXO1	0.896669	-0.474095	3.88851e-12	2.15407e-11	No-Deg
7869	0.89653	5.61269	8.27636e-13	4.8885e-12	No-Deg
GMFG	0.895211	4.25224	9.30756e-13	5.46163e-12	No-Deg
FBXO4	0.895074	4.2883	9.37178e-13	5.49706e-12	No-Deg
NOP58	0.894712	6.83149	9.13159e-13	5.36934e-12	No-Deg
CA2	0.89403	6.42841	9.55173e-13	5.59804e-12	No-Deg
SUPV3L1	0.894018	4.61878	9.87934e-13	5.77589e-12	No-Deg
LGALS2	0.893867	1.02894	1.6589e-12	9.48238e-12	No-Deg
PHF7	0.893768	2.12934	1.24117e-12	7.20068e-12	No-Deg
CSTA	0.89374	4.36937	1.01372e-12	5.91703e-12	No-Deg
ATP6V1D	0.893278	6.17053	1.00274e-12	5.8553e-12	No-Deg
MRPL20	0.892827	6.07944	1.03189e-12	6.01575e-12	No-Deg
TSPAN1	0.89274	6.77742	1.03074e-12	6.01147e-12	No-Deg
KAT8	0.8921	5.15548	1.09509e-12	6.37123e-12	No-Deg
SNRNP70	0.892037	7.13544	1.0736e-12	6.25125e-12	No-Deg
GTF2H5	0.891382	5.18666	1.14339e-12	6.64418e-12	No-Deg
NUDT8	0.890308	2.45809	1.45236e-12	8.36171e-12	No-Deg
CAPN12	0.890242	2.20887	1.51548e-12	8.70067e-12	No-Deg
CKMT1A	0.889957	3.42778	1.34238e-12	7.76591e-12	No-Deg
PQBP1	0.889834	5.60136	1.2469e-12	7.23101e-12	No-Deg
CD27-AS1	0.889772	4.0575	1.30833e-12	7.58111e-12	No-Deg
FANCL	0.889337	4.44122	1.32242e-12	7.65967e-12	No-Deg
PCGF1	0.889322	3.77465	1.36431e-12	7.88325e-12	No-Deg
GOLGA2P5	0.889293	3.85265	1.3609e-12	7.86667e-12	No-Deg
TAZ	0.888947	3.96758	1.38156e-12	7.97005e-12	No-Deg
ADK	0.88881	4.164	1.38042e-12	7.96669e-12	No-Deg
SBSN	0.888635	-1.23924	1.81263e-11	9.31498e-11	No-Deg
ACOT13	0.888461	4.98867	1.37222e-12	7.92574e-12	No-Deg
FAM207A	0.888344	3.30748	1.49381e-12	8.58656e-12	No-Deg
SFR1	0.888319	2.54404	1.61873e-12	9.26753e-12	No-Deg
UBXN1	0.888086	6.27084	1.37502e-12	7.9387e-12	No-Deg
TAMM41	0.887563	2.83002	1.63707e-12	9.36875e-12	No-Deg
RGS11	0.887527	3.5264	1.54482e-12	8.85847e-12	No-Deg
MPC2	0.887517	6.08356	1.42624e-12	8.21792e-12	No-Deg
ARL6IP4	0.887095	7.13108	1.45089e-12	8.3566e-12	No-Deg
ATHL1	0.887026	6.79539	1.46e-12	8.40229e-12	No-Deg
MT1X	0.88687	4.88353	1.51536e-12	8.70067e-12	No-Deg
RNFT2	0.886688	2.2031	1.87951e-12	1.07135e-11	No-Deg
NUP37	0.886471	3.85207	1.6149e-12	9.24927e-12	No-Deg
ABHD10	0.886466	5.01466	1.54785e-12	8.87233e-12	No-Deg
NAPRT	0.886018	5.7401	1.569e-12	8.98997e-12	No-Deg
TRAIP	0.885306	2.70563	1.90251e-12	1.08274e-11	No-Deg
STRADB	0.884675	3.73044	1.81233e-12	1.03347e-11	No-Deg
SRI	0.884643	6.40874	1.69215e-12	9.66857e-12	No-Deg
WDR70	0.884511	4.64525	1.75992e-12	1.00478e-11	No-Deg
C2orf81	0.884477	3.09043	1.92174e-12	1.09325e-11	No-Deg
CRLS1	0.883801	5.40466	1.80413e-12	1.0292e-11	No-Deg
FABP7	0.883661	-0.417874	7.73614e-12	4.15402e-11	No-Deg
PEX14	0.883195	4.37655	1.92292e-12	1.09349e-11	No-Deg
RFESD	0.883183	0.531753	3.91561e-12	2.16657e-11	No-Deg
CHMP4A	0.882936	5.90246	1.88647e-12	1.07489e-11	No-Deg
NEK11	0.882923	4.52997	1.94429e-12	1.1052e-11	No-Deg
SOD1	0.882626	7.7862	1.89646e-12	1.07973e-11	No-Deg
STX18	0.882144	4.94217	2.0137e-12	1.1433e-11	No-Deg
ELP5	0.882032	4.57368	2.04862e-12	1.16175e-11	No-Deg
ZBED8	0.881529	2.33527	2.50796e-12	1.41386e-11	No-Deg
NEDD8	0.880385	6.60219	2.18472e-12	1.23844e-11	No-Deg
PTRH2	0.880045	4.87654	2.28879e-12	1.2959e-11	No-Deg
BORCS7	0.879737	5.08758	2.31979e-12	1.31213e-11	No-Deg
ABHD12	0.879523	6.46357	2.30365e-12	1.3038e-11	No-Deg
PSENEN	0.879441	6.23035	2.3202e-12	1.31213e-11	No-Deg
RPP25L	0.87914	4.28161	2.46331e-12	1.39141e-11	No-Deg
SPRYD7	0.879139	3.45252	2.57359e-12	1.45029e-11	No-Deg
SLC25A5-AS1	0.87901	0.962073	4.11425e-12	2.27385e-11	No-Deg
NECAB3	0.878887	5.48686	2.42247e-12	1.36889e-11	No-Deg
ETV4	0.878853	2.78995	2.77518e-12	1.56082e-11	No-Deg
CDKN3	0.878732	2.59911	2.85846e-12	1.60389e-11	No-Deg
SLC9A3R2	0.87826	7.36148	2.4711e-12	1.39526e-11	No-Deg
RPL30	0.878065	9.76635	2.48687e-12	1.40307e-11	No-Deg
ALKBH2	0.87788	3.88401	2.70428e-12	1.52214e-11	No-Deg
MRPS11	0.877576	4.95773	2.64918e-12	1.49171e-11	No-Deg
CD1A	0.876914	0.569096	5.54087e-12	3.01471e-11	No-Deg
METTL17	0.876615	4.67605	2.82756e-12	1.58717e-11	No-Deg
RPL35A	0.876611	8.93814	2.71628e-12	1.52829e-11	No-Deg
LEKR1	0.876268	1.54763	4.01293e-12	2.21871e-11	No-Deg
RNF212	0.876177	1.00167	4.78642e-12	2.63216e-11	No-Deg
MRPL34	0.876045	4.83281	2.91286e-12	1.6325e-11	No-Deg
NEURL3	0.875898	0.0422494	8.10737e-12	4.33874e-11	No-Deg
DHRS7	0.875839	6.52672	2.87223e-12	1.61099e-11	No-Deg
RDH5	0.873229	1.74032	4.58398e-12	2.52664e-11	No-Deg
DCUN1D5	0.873068	4.91186	3.47252e-12	1.93708e-11	No-Deg
C5orf63	0.872926	1.52393	4.91649e-12	2.69956e-11	No-Deg
IDUA	0.872432	4.0691	3.7105e-12	2.06118e-11	No-Deg
GLRX	0.872419	5.03602	3.59878e-12	2.00362e-11	No-Deg
SAT1	0.872413	8.22086	3.49617e-12	1.94876e-11	No-Deg
NDUFB10	0.871957	6.54154	3.62113e-12	2.0145e-11	No-Deg
SRA1	0.871894	5.06268	3.71079e-12	2.06118e-11	No-Deg
SEPW1	0.871755	7.31989	3.64737e-12	2.02831e-11	No-Deg
57150	0.87163	1.8632	4.90575e-12	2.69469e-11	No-Deg
LRG1	0.871559	5.64818	3.74511e-12	2.07944e-11	No-Deg
NPRL2	0.871243	4.51836	3.91455e-12	2.16657e-11	No-Deg
79101	0.870868	5.22325	3.93088e-12	2.17418e-11	No-Deg
RPL26	0.870783	9.2627	3.84552e-12	2.13272e-11	No-Deg
SP5	0.870576	1.52128	5.64788e-12	3.06596e-11	No-Deg
SLC10A5	0.870271	0.646228	7.84586e-12	4.20821e-11	No-Deg
PNPLA7	0.869833	3.61077	4.43445e-12	2.44705e-11	No-Deg
TEFM	0.869729	2.85278	4.74044e-12	2.60888e-11	No-Deg
MRPS25	0.868967	5.12094	4.40992e-12	2.43444e-11	No-Deg
RPLP0P2	0.86852	2.45172	5.33827e-12	2.9111e-11	No-Deg
RILPL2	0.868085	4.71436	4.69313e-12	2.58383e-11	No-Deg
PIGL	0.868054	1.83879	6.08298e-12	3.29592e-11	No-Deg
AMN1	0.867556	3.01811	5.30362e-12	2.8955e-11	No-Deg
GNPTG	0.867202	6.06818	4.82434e-12	2.65098e-11	No-Deg
HINT1	0.867183	7.62456	4.77952e-12	2.62938e-11	No-Deg
ROPN1	0.866895	-1.34583	7.08388e-11	3.41879e-10	No-Deg
LBHD1	0.866727	5.10387	5.03736e-12	2.76275e-11	No-Deg
SNRNP25	0.866549	5.31353	5.06933e-12	2.77922e-11	No-Deg
FZD2	0.866231	3.19949	5.64589e-12	3.06596e-11	No-Deg
NAXE	0.86608	6.9633	5.11787e-12	2.80263e-11	No-Deg
TMEM101	0.866055	5.51474	5.20144e-12	2.84405e-11	No-Deg
MRPL14	0.865861	5.55808	5.25775e-12	2.87156e-11	No-Deg
IER5L	0.865594	4.95332	5.40446e-12	2.94384e-11	No-Deg
TOMM5	0.865432	5.47799	5.39958e-12	2.9423e-11	No-Deg
LCMT1	0.864907	5.47269	5.56994e-12	3.02823e-11	No-Deg
PPP1R3F	0.864725	1.68038	7.64795e-12	4.10974e-11	No-Deg
AGPAT2	0.864724	5.95019	5.59287e-12	3.03955e-11	No-Deg
NUTM2A	0.864624	1.113	9.0168e-12	4.80394e-11	No-Deg
WDR61	0.863973	5.70559	5.8646e-12	3.1788e-11	No-Deg
LYAR	0.863609	3.54368	6.42837e-12	3.47913e-11	No-Deg
HAUS7	0.863215	3.4423	6.62241e-12	3.58009e-11	No-Deg
NDUFB9	0.862965	7.15163	6.14435e-12	3.32792e-11	No-Deg
UBE2T	0.862144	4.20703	6.77659e-12	3.66206e-11	No-Deg
RPL26L1	0.861701	4.13889	6.97429e-12	3.76041e-11	No-Deg
DUSP23	0.86126	5.67856	6.88229e-12	3.71638e-11	No-Deg
TMEM41B	0.86101	5.95649	6.95935e-12	3.75433e-11	No-Deg
BST2	0.859684	7.67476	7.4347e-12	4.00114e-11	No-Deg
DLX2	0.85965	1.5198	1.06711e-11	5.64339e-11	No-Deg
ACY1	0.859435	5.11538	7.73543e-12	4.15402e-11	No-Deg
DTYMK	0.859326	4.60276	7.88546e-12	4.22787e-11	No-Deg
LINC00115	0.859093	0.228453	1.86393e-11	9.56491e-11	No-Deg
ANKRD30B	0.858858	4.43444	8.14767e-12	4.35868e-11	No-Deg
LINC00324	0.858627	1.91449	1.03777e-11	5.49435e-11	No-Deg
RRNAD1	0.858336	5.12832	8.24726e-12	4.40868e-11	No-Deg
TUSC1	0.858327	4.46759	8.39562e-12	4.48464e-11	No-Deg
AK5	0.858241	3.7679	8.68955e-12	4.63475e-11	No-Deg
TNFRSF17	0.858209	0.847189	1.43863e-11	7.49225e-11	No-Deg
WDR83OS	0.857766	6.56429	8.36776e-12	4.47143e-11	No-Deg
AIM1L	0.857123	-0.0983426	2.60694e-11	1.31891e-10	No-Deg
TTLL1	0.856959	3.7706	9.36308e-12	4.98103e-11	No-Deg
FGF12	0.856925	1.84445	1.16106e-11	6.10204e-11	No-Deg
RPL32	0.856907	9.58549	8.71458e-12	4.64637e-11	No-Deg
MILR1	0.856607	1.03143	1.47109e-11	7.65298e-11	No-Deg
CD163L1	0.856306	2.42125	1.09406e-11	5.76681e-11	No-Deg
EEF1B2	0.85578	7.6112	9.34433e-12	4.9729e-11	No-Deg
FGGY	0.855245	2.60562	1.13671e-11	5.98721e-11	No-Deg
MND1	0.854877	1.27172	1.50306e-11	7.79384e-11	No-Deg
MNAT1	0.85474	4.38594	1.03768e-11	5.49435e-11	No-Deg
CRIPT	0.85467	4.68032	1.03249e-11	5.47041e-11	No-Deg
PSMB1	0.854642	7.20529	1.0003e-11	5.31127e-11	No-Deg
NOP16	0.854602	3.86589	1.06873e-11	5.64991e-11	No-Deg
SLC45A1	0.854461	1.02985	1.66383e-11	8.59028e-11	No-Deg
CFAP43	0.854408	2.5836	1.19624e-11	6.28232e-11	No-Deg
RPL18	0.853733	9.36312	1.04896e-11	5.55151e-11	No-Deg
746	0.853449	6.05017	1.08144e-11	5.70657e-11	No-Deg
ERH	0.853445	6.76049	1.07518e-11	5.67982e-11	No-Deg
PSMB4	0.853344	7.74607	1.07647e-11	5.68452e-11	No-Deg
HDHD3	0.853269	4.81966	1.11596e-11	5.8801e-11	No-Deg
ACRC	0.852959	0.410084	2.37352e-11	1.20336e-10	No-Deg
C12orf73	0.852822	3.0749	1.24774e-11	6.53369e-11	No-Deg
84727	0.852762	3.24895	1.23486e-11	6.46859e-11	No-Deg
FAM134B	0.852654	5.56071	1.13977e-11	6.00113e-11	No-Deg
HES1	0.852479	6.04737	1.14421e-11	6.0179e-11	No-Deg
NAP1L4	0.852361	7.31976	1.14164e-11	6.00658e-11	No-Deg
FARSB	0.85156	6.30044	1.20388e-11	6.32018e-11	No-Deg
DCP1B	0.851358	4.21404	1.27065e-11	6.64639e-11	No-Deg
7307	0.851242	6.14311	1.22817e-11	6.44059e-11	No-Deg
ELP6	0.850676	4.46517	1.31021e-11	6.8483e-11	No-Deg
CLEC2B	0.850476	4.44677	1.32624e-11	6.92956e-11	No-Deg
AP2S1	0.850368	6.26177	1.29049e-11	6.74771e-11	No-Deg
RGS9	0.850339	1.10376	2.05196e-11	1.04848e-10	No-Deg
MTRF1	0.849798	1.6185	1.8352e-11	9.42418e-11	No-Deg
ORM1	0.849734	1.48873	1.90053e-11	9.74223e-11	No-Deg
SLC35D2	0.849472	4.24904	1.41524e-11	7.38384e-11	No-Deg
SNRPN	0.849032	6.28031	1.39406e-11	7.27864e-11	No-Deg
DCUN1D2	0.848955	3.94074	1.47683e-11	7.68004e-11	No-Deg
MED6	0.848652	3.94072	1.50293e-11	7.79384e-11	No-Deg
PLIN5	0.84834	3.80076	1.54058e-11	7.97718e-11	No-Deg
MNX1	0.84786	0.305339	3.34674e-11	1.67081e-10	No-Deg
PNCK	0.847857	1.17585	2.30844e-11	1.17285e-10	No-Deg
CALML4	0.847323	3.77993	1.63521e-11	8.45162e-11	No-Deg
PRELID3A	0.84684	1.51138	2.22808e-11	1.13403e-10	No-Deg
STARD5	0.846435	2.74106	1.86007e-11	9.5485e-11	No-Deg
TRAPPC6A	0.846364	5.15157	1.65154e-11	8.52987e-11	No-Deg
KCNMB3	0.846239	2.05884	2.06128e-11	1.05287e-10	No-Deg
DTNB	0.846144	4.60716	1.69449e-11	8.74227e-11	No-Deg
CCDC94	0.845959	4.14696	1.73955e-11	8.95866e-11	No-Deg
TDRD5	0.845606	2.96022	1.9093e-11	9.78374e-11	No-Deg
ATP5C1	0.845264	7.64713	1.71876e-11	8.85796e-11	No-Deg
SNHG7	0.845019	4.79949	1.79849e-11	9.24889e-11	No-Deg
GNG5	0.844989	6.45333	1.75758e-11	9.04825e-11	No-Deg
CLHC1	0.844907	2.67895	2.04359e-11	1.04457e-10	No-Deg
TAF10	0.844812	5.57173	1.79281e-11	9.223e-11	No-Deg
STARD10	0.844741	8.18727	1.76845e-11	9.10096e-11	No-Deg
TMEM208	0.84421	4.96655	1.87654e-11	9.62616e-11	No-Deg
HSD17B14	0.844199	2.8049	2.10012e-11	1.07132e-10	No-Deg
NPM3	0.844005	3.90435	1.96655e-11	1.00699e-10	No-Deg
DYX1C1	0.843524	3.05794	2.1327e-11	1.08664e-10	No-Deg
TBX6	0.843333	1.0773	3.07574e-11	1.54627e-10	No-Deg
SLC7A4	0.842926	2.02349	2.50401e-11	1.26728e-10	No-Deg
MT1E	0.842292	4.90689	2.09759e-11	1.07065e-10	No-Deg
TPPP3	0.842129	4.49424	2.1408e-11	1.09038e-10	No-Deg
PPP2R5A	0.841606	7.56943	2.12106e-11	1.08124e-10	No-Deg
COA5	0.841357	4.72175	2.22298e-11	1.13183e-10	No-Deg
MAPKAPK5-AS1	0.841158	4.07191	2.2974e-11	1.16766e-10	No-Deg
BET1	0.841064	5.14733	2.23883e-11	1.13869e-10	No-Deg
EAPP	0.840975	5.67683	2.23073e-11	1.13498e-10	No-Deg
SWI5	0.840909	4.28229	2.31168e-11	1.17408e-10	No-Deg
MPLKIP	0.840345	4.30577	2.38527e-11	1.20889e-10	No-Deg
C1orf35	0.839877	4.6332	2.42491e-11	1.22768e-10	No-Deg
HOXB8	0.839582	0.596539	4.57432e-11	2.25155e-10	No-Deg
FKBP1B	0.839465	1.31711	3.55561e-11	1.76771e-10	No-Deg
RPSA	0.839285	7.93103	2.41943e-11	1.22534e-10	No-Deg
PPIL3	0.839245	3.43779	2.64745e-11	1.33846e-10	No-Deg
CYP2R1	0.838999	3.68731	2.64593e-11	1.33816e-10	No-Deg
RGL3	0.83867	3.27433	2.76571e-11	1.39383e-10	No-Deg
FDX2	0.838608	3.85504	2.6827e-11	1.35533e-10	No-Deg
KCNN4	0.83854	3.76538	2.70491e-11	1.36511e-10	No-Deg
CCDC173	0.838243	3.66424	2.76556e-11	1.39383e-10	No-Deg
TWIST1	0.838232	3.32932	2.82461e-11	1.42201e-10	No-Deg
SPAG16	0.838107	4.65072	2.68115e-11	1.35502e-10	No-Deg
PGAM2	0.837829	0.581965	5.07417e-11	2.4882e-10	No-Deg
NOP10	0.837535	5.56665	2.71883e-11	1.37116e-10	No-Deg
C3orf33	0.837512	2.29445	3.26293e-11	1.63295e-10	No-Deg
JUND	0.837423	7.78474	2.69166e-11	1.35937e-10	No-Deg
ATRAID	0.836979	6.70724	2.77453e-11	1.39778e-10	No-Deg
TMEM177	0.835571	3.5218	3.24463e-11	1.62548e-10	No-Deg
SRP19	0.835328	5.24118	3.0986e-11	1.55722e-10	No-Deg
FAAH	0.835273	5.11937	3.11544e-11	1.56514e-10	No-Deg
FBXL2	0.835064	3.28007	3.39174e-11	1.69092e-10	No-Deg
PPDPF	0.834145	8.68583	3.23641e-11	1.62193e-10	No-Deg
C12orf10	0.833895	5.23654	3.36122e-11	1.67745e-10	No-Deg
C1orf123	0.833701	4.91868	3.42041e-11	1.70403e-10	No-Deg
ABHD16B	0.833621	2.39378	4.00909e-11	1.98697e-10	No-Deg
GEMIN8	0.833317	4.61701	3.52188e-11	1.75215e-10	No-Deg
ANO9	0.833261	3.57274	3.68639e-11	1.83019e-10	No-Deg
TNNT3	0.833037	0.221629	7.95589e-11	3.82293e-10	No-Deg
RPL17	0.832837	8.3845	3.48735e-11	1.73557e-10	No-Deg
PSMD13	0.832488	6.80936	3.57777e-11	1.77749e-10	No-Deg
PRRG2	0.831811	3.5263	4.01144e-11	1.98744e-10	No-Deg
FAM204A	0.83176	5.21548	3.7942e-11	1.88241e-10	No-Deg
CATSPERG	0.831084	0.855355	6.5793e-11	3.18922e-10	No-Deg
VGF	0.830342	-1.24882	3.98964e-10	1.78113e-09	No-Deg
C11orf31	0.830151	5.83696	4.11688e-11	2.03898e-10	No-Deg
CRELD2	0.829838	5.12928	4.23577e-11	2.09641e-10	No-Deg
RHPN1	0.829542	5.77853	4.26364e-11	2.10948e-10	No-Deg
SUSD3	0.82947	6.10777	4.26561e-11	2.10973e-10	No-Deg
SSSCA1	0.829388	4.20316	4.45431e-11	2.19625e-10	No-Deg
KLHDC2	0.829249	6.23249	4.31396e-11	2.13196e-10	No-Deg
SLC25A45	0.829204	3.16278	4.75848e-11	2.33979e-10	No-Deg
RPS27A	0.828975	8.99497	4.33318e-11	2.1402e-10	No-Deg
CCDC61	0.828634	3.2906	4.86822e-11	2.39047e-10	No-Deg
DNAJC30	0.82819	4.13321	4.77714e-11	2.34816e-10	No-Deg
LCA5L	0.827883	3.05007	5.16926e-11	2.5331e-10	No-Deg
CNKSR3	0.827673	3.53443	5.05928e-11	2.48174e-10	No-Deg
SLC25A29	0.827578	6.05607	4.74734e-11	2.33511e-10	No-Deg
RBPMS	0.827132	5.96265	4.87259e-11	2.3918e-10	No-Deg
SLC23A1	0.826117	0.746087	9.01518e-11	4.30885e-10	No-Deg
LINC00339	0.82557	3.5579	5.68325e-11	2.77738e-10	No-Deg
KIAA0101	0.824784	4.11667	5.78517e-11	2.82431e-10	No-Deg
NHLRC1	0.824573	2.76687	6.37741e-11	3.09553e-10	No-Deg
RPL12	0.824468	8.91405	5.58228e-11	2.7299e-10	No-Deg
MAP2K5	0.824363	3.80205	6.00303e-11	2.9237e-10	No-Deg
THG1L	0.824316	3.09684	6.28556e-11	3.05302e-10	No-Deg
PPAN	0.824278	4.21128	5.92988e-11	2.89102e-10	No-Deg
ZG16B	0.82421	6.5648	5.70975e-11	2.78938e-10	No-Deg
TIPIN	0.824167	1.73582	7.55489e-11	3.63755e-10	No-Deg
MVB12A	0.824079	5.1008	5.85517e-11	2.8575e-10	No-Deg
USF1	0.823837	5.88001	5.86608e-11	2.86186e-10	No-Deg
GMDS	0.823785	4.37003	6.06281e-11	2.94881e-10	No-Deg
KHDC1	0.823686	0.076106	1.44055e-10	6.73271e-10	No-Deg
CHCHD10	0.823636	4.69752	6.05629e-11	2.94664e-10	No-Deg
NSA2	0.82337	6.52197	5.98631e-11	2.91655e-10	No-Deg
7205	0.823368	5.95001	6.01734e-11	2.92968e-10	No-Deg
TIMM21	0.823355	3.75159	6.36588e-11	3.09098e-10	No-Deg
HPRT1	0.823238	5.16198	6.12995e-11	2.98046e-10	No-Deg
TRIM45	0.822863	4.1427	6.43346e-11	3.12063e-10	No-Deg
NDUFAF3	0.822722	5.78381	6.25025e-11	3.03689e-10	No-Deg
BCAT2	0.822377	5.45456	6.40013e-11	3.10551e-10	No-Deg
SDF2L1	0.822136	4.74061	6.57794e-11	3.18922e-10	No-Deg
THAP7	0.821704	4.53036	6.77582e-11	3.28115e-10	No-Deg
FBXW4	0.821554	6.04439	6.65193e-11	3.22333e-10	No-Deg
PPIA	0.82108	7.98681	6.75762e-11	3.27344e-10	No-Deg
LXN	0.821052	4.62038	7.00902e-11	3.38836e-10	No-Deg
SRSF5	0.820953	7.61516	6.81324e-11	3.29816e-10	No-Deg
MRPS33	0.820815	5.01702	7.03628e-11	3.39925e-10	No-Deg
MMP7	0.82073	5.96625	6.97006e-11	3.37066e-10	No-Deg
FAM110A	0.820664	5.11674	7.08186e-11	3.41879e-10	No-Deg
C9orf85	0.820467	1.96279	8.88802e-11	4.25091e-10	No-Deg
MRPL11	0.820185	5.16568	7.26629e-11	3.50565e-10	No-Deg
TEX264	0.819717	6.12139	7.36323e-11	3.55122e-10	No-Deg
EPS8L1	0.819683	5.77618	7.40417e-11	3.56857e-10	No-Deg
DRAM2	0.819474	5.98278	7.47348e-11	3.59956e-10	No-Deg
NUDT14	0.819209	4.53568	7.78295e-11	3.74234e-10	No-Deg
CDC16	0.819044	6.27991	7.63294e-11	3.67389e-10	No-Deg
C17orf67	0.818657	1.08143	1.20403e-10	5.68654e-10	No-Deg
TIMM13	0.81842	6.20558	7.90727e-11	3.80084e-10	No-Deg
PRSS36	0.818353	1.28256	1.15518e-10	5.46123e-10	No-Deg
NME7	0.818319	4.41621	8.20591e-11	3.94043e-10	No-Deg
PYDC1	0.818299	2.26995	9.55965e-11	4.55998e-10	No-Deg
CYB5R2	0.818189	3.35045	8.67478e-11	4.15307e-10	No-Deg
ARMC5	0.818066	4.10567	8.4108e-11	4.03342e-10	No-Deg
PLAC9	0.817799	2.78706	9.26445e-11	4.42652e-10	No-Deg
PNLDC1	0.817644	-0.403918	2.82672e-10	1.2823e-09	No-Deg
NDUFA6	0.817622	5.64551	8.31536e-11	3.99032e-10	No-Deg
POLR3K	0.817353	4.98022	8.53426e-11	4.09126e-10	No-Deg
RNF181	0.81702	5.91927	8.56983e-11	4.10556e-10	No-Deg
ZFAS1	0.816902	6.48807	8.5822e-11	4.11012e-10	No-Deg
LINC00909	0.816549	3.09838	9.66626e-11	4.60624e-10	No-Deg
NIT1	0.816314	5.2195	8.99838e-11	4.30226e-10	No-Deg
ZNF540	0.816106	2.13083	1.09995e-10	5.20869e-10	No-Deg
CUTC	0.816028	3.45506	9.71179e-11	4.6264e-10	No-Deg
ANKRD16	0.815859	3.35752	9.8616e-11	4.68998e-10	No-Deg
NDUFB5	0.815532	6.2716	9.27424e-11	4.42972e-10	No-Deg
RTN2	0.815198	4.11338	9.85301e-11	4.68745e-10	No-Deg
SNRPB	0.814922	7.14194	9.53978e-11	4.55201e-10	No-Deg
NDUFB4	0.814767	6.81434	9.63808e-11	4.59433e-10	No-Deg
PBDC1	0.814484	4.83954	1.00319e-10	4.76702e-10	No-Deg
SUGT1P3	0.81398	1.4408	1.40828e-10	6.59051e-10	No-Deg
EIF5B	0.813536	8.50099	1.02574e-10	4.87014e-10	No-Deg
TMEM26	0.813293	4.65788	1.07592e-10	5.10332e-10	No-Deg
TRAPPC2L	0.813254	4.65701	1.07829e-10	5.11289e-10	No-Deg
RPL36	0.812972	9.20654	1.05707e-10	5.01559e-10	No-Deg
DEGS1	0.812358	7.17438	1.09881e-10	5.20677e-10	No-Deg
COX14	0.812257	4.92412	1.13203e-10	5.35355e-10	No-Deg
ANKRD39	0.812158	2.88248	1.25226e-10	5.89881e-10	No-Deg
EEF1E1	0.811782	4.38177	1.17833e-10	5.56702e-10	No-Deg
ATP6V0E2-AS1	0.811374	0.935381	1.87192e-10	8.6447e-10	No-Deg
ATP6V1E1	0.811196	6.95464	1.17264e-10	5.54196e-10	No-Deg
CCDC73	0.811171	1.99531	1.47087e-10	6.86547e-10	No-Deg
FBXW9	0.810905	3.74361	1.26746e-10	5.96452e-10	No-Deg
PIGU	0.81027	5.1521	1.25696e-10	5.91899e-10	No-Deg
ATP5S	0.809878	2.47497	1.47778e-10	6.89103e-10	No-Deg
283131	0.809783	10.0215	1.25897e-10	5.92651e-10	No-Deg
ANKRD37	0.809507	2.56497	1.49291e-10	6.95932e-10	No-Deg
5721	0.809295	7.01463	1.3013e-10	6.11577e-10	No-Deg
FAU	0.809125	8.08467	1.30859e-10	6.14801e-10	No-Deg
ZNF541	0.808984	0.934029	2.12922e-10	9.7794e-10	No-Deg
COX19	0.808809	3.6912	1.4252e-10	6.6675e-10	No-Deg
GSC	0.808528	1.55404	1.84417e-10	8.53026e-10	No-Deg
SSB	0.808356	7.54449	1.367e-10	6.40987e-10	No-Deg
UPF3A	0.808007	4.9241	1.42924e-10	6.68205e-10	No-Deg
GTF2B	0.807887	4.63892	1.44823e-10	6.76201e-10	No-Deg
CES4A	0.807632	1.82841	1.83348e-10	8.49176e-10	No-Deg
GRASP	0.807423	2.52296	1.67987e-10	7.80548e-10	No-Deg
ZNF821	0.807104	3.06503	1.6258e-10	7.56161e-10	No-Deg
APTX	0.806813	5.02317	1.52258e-10	7.09303e-10	No-Deg
IQCG	0.805108	3.71515	1.74177e-10	8.08184e-10	No-Deg
HOXC9	0.804719	3.13397	1.84143e-10	8.52306e-10	No-Deg
BDNF-AS	0.804568	0.77454	2.85058e-10	1.29149e-09	No-Deg
ME3	0.804493	3.45141	1.82622e-10	8.46084e-10	No-Deg
ADI1	0.804451	5.98606	1.7084e-10	7.93037e-10	No-Deg
CSAD	0.803824	4.75578	1.80226e-10	8.35257e-10	No-Deg
SPIN2B	0.803121	2.4614	2.13536e-10	9.80136e-10	No-Deg
VTI1B	0.803	5.88013	1.85071e-10	8.55772e-10	No-Deg
HAUS8	0.802521	3.16691	2.06944e-10	9.52009e-10	No-Deg
MDP1	0.802375	3.45137	2.04855e-10	9.42702e-10	No-Deg
MIS18A	0.802217	3.76018	2.0334e-10	9.36028e-10	No-Deg
TSPO	0.801286	6.83776	2.01616e-10	9.28392e-10	No-Deg
PIGH	0.800979	4.29053	2.13007e-10	9.7802e-10	No-Deg
SMIM19	0.800968	5.20938	2.08541e-10	9.58434e-10	No-Deg
STAG3L4	0.800658	2.84972	2.34601e-10	1.07168e-09	No-Deg
PSMB7	0.799581	6.64664	2.21377e-10	1.01483e-09	No-Deg
SEC11A	0.799542	7.20515	2.21214e-10	1.0144e-09	No-Deg
GLTSCR2	0.799492	8.09796	2.21179e-10	1.0144e-09	No-Deg
RPP40	0.799256	3.37354	2.43565e-10	1.11086e-09	No-Deg
ATPIF1	0.799017	6.236	2.28919e-10	1.04773e-09	No-Deg
PIH1D1	0.798557	5.63505	2.36127e-10	1.07831e-09	No-Deg
MRPL9	0.798352	5.85903	2.38143e-10	1.08683e-09	No-Deg
ACOT1	0.797666	4.95348	2.50478e-10	1.14094e-09	No-Deg
VCPKMT	0.79738	3.40031	2.69009e-10	1.22264e-09	No-Deg
S100A6	0.796506	8.3336	2.59775e-10	1.18254e-09	No-Deg
TMEM62	0.796059	5.43912	2.70897e-10	1.23048e-09	No-Deg
HMGCL	0.796028	5.55921	2.70907e-10	1.23048e-09	No-Deg
COMMD6	0.795514	5.85227	2.77536e-10	1.2594e-09	No-Deg
BEX1	0.79551	3.7844	2.91627e-10	1.31792e-09	No-Deg
ASNS	0.795365	4.59318	2.85853e-10	1.29428e-09	No-Deg
GDPD3	0.795294	3.03679	3.08263e-10	1.38961e-09	No-Deg
ATRNL1	0.795255	3.63901	2.97676e-10	1.34399e-09	No-Deg
MTX2	0.79505	5.00582	2.88066e-10	1.30265e-09	No-Deg
DNAJC7	0.795041	6.45712	2.83186e-10	1.28422e-09	No-Deg
NR2C2AP	0.794882	4.65339	2.92921e-10	1.32294e-09	No-Deg
DNAJC8	0.794806	6.66348	2.864e-10	1.29634e-09	No-Deg
COPE	0.794725	7.1777	2.86897e-10	1.29818e-09	No-Deg
MRM1	0.794702	2.43361	3.36599e-10	1.51354e-09	No-Deg
SCN1A	0.794667	0.110932	6.50856e-10	2.83599e-09	No-Deg
COX6A1	0.794637	6.88939	2.88642e-10	1.30485e-09	No-Deg
EMC6	0.794571	3.68981	3.0803e-10	1.38899e-09	No-Deg
ZNF622	0.794264	5.17521	2.99572e-10	1.35212e-09	No-Deg
METTL18	0.793999	3.75548	3.16643e-10	1.42693e-09	No-Deg
BLOC1S4	0.793579	4.14716	3.18822e-10	1.43585e-09	No-Deg
FOXRED1	0.793507	4.2945	3.18509e-10	1.43489e-09	No-Deg
NANS	0.792804	6.4207	3.19413e-10	1.43806e-09	No-Deg
NDUFA9	0.792765	6.009	3.21168e-10	1.44505e-09	No-Deg
GZMA	0.792691	2.88557	3.58546e-10	1.60819e-09	No-Deg
BAX	0.791776	5.12479	3.42596e-10	1.53857e-09	No-Deg
RBBP8NL	0.791392	3.16166	3.76304e-10	1.68468e-09	No-Deg
OSGEP	0.791058	4.47937	3.61123e-10	1.61924e-09	No-Deg
RPS6	0.790884	10.7	3.50561e-10	1.57336e-09	No-Deg
DAPK2	0.790413	3.6791	3.84879e-10	1.722e-09	No-Deg
KHK	0.790335	2.57922	4.1804e-10	1.85993e-09	No-Deg
COL9A3	0.789986	1.31922	5.22735e-10	2.30289e-09	No-Deg
ZMYND15	0.789984	1.48134	5.0358e-10	2.22533e-09	No-Deg
ISG20	0.789952	4.26103	3.85562e-10	1.72452e-09	No-Deg
QDPR	0.789869	6.091	3.74715e-10	1.67862e-09	No-Deg
TCEAL1	0.789238	5.31887	3.91088e-10	1.74869e-09	No-Deg
PUS1	0.78888	3.94181	4.12861e-10	1.83974e-09	No-Deg
ISG15	0.788835	7.49749	3.92807e-10	1.75528e-09	No-Deg
EEF2KMT	0.788797	4.65836	4.05538e-10	1.80879e-09	No-Deg
ACAT1	0.788772	5.85999	3.98197e-10	1.77826e-09	No-Deg
WDR13	0.78876	5.9733	3.97984e-10	1.77786e-09	No-Deg
GNGT2	0.788153	0.685217	6.97984e-10	3.03121e-09	No-Deg
VPS45	0.787943	5.9988	4.15601e-10	1.85137e-09	No-Deg
RHEB	0.787842	6.31701	4.16701e-10	1.8557e-09	No-Deg
LY96	0.787439	3.43743	4.56465e-10	2.02649e-09	No-Deg
UNC50	0.787293	5.45454	4.32923e-10	1.92376e-09	No-Deg
TMEM218	0.786982	3.92662	4.56942e-10	2.02798e-09	No-Deg
TARBP1	0.786806	6.04251	4.41331e-10	1.95991e-09	No-Deg
CETN3	0.786424	4.5146	4.61745e-10	2.04866e-09	No-Deg
VPS37D	0.786316	2.32844	5.31639e-10	2.33996e-09	No-Deg
RARRES3	0.785621	7.28163	4.6644e-10	2.06885e-09	No-Deg
NFKBIB	0.785587	4.18864	4.87376e-10	2.15705e-09	No-Deg
PHLDA3	0.785461	5.73179	4.75526e-10	2.1072e-09	No-Deg
FAM96B	0.785213	4.73791	4.89687e-10	2.16661e-09	No-Deg
THEM4	0.784954	4.37507	5.01079e-10	2.21496e-09	No-Deg
FAHD2B	0.78494	3.83048	5.11161e-10	2.25675e-09	No-Deg
27113	0.784892	3.89913	5.11013e-10	2.25675e-09	No-Deg
CCDC90B	0.784743	5.41552	4.95951e-10	2.19297e-09	No-Deg
ZNF155	0.784649	3.01411	5.43733e-10	2.39099e-09	No-Deg
440101	0.784575	1.38251	6.83533e-10	2.97115e-09	No-Deg
C11orf80	0.784238	4.35069	5.20822e-10	2.29587e-09	No-Deg
EPHX2	0.783567	5.02668	5.31139e-10	2.3388e-09	No-Deg
NUDT9	0.783536	5.11024	5.31213e-10	2.3388e-09	No-Deg
RNASE6	0.782932	3.92743	5.66136e-10	2.48494e-09	No-Deg
FAM185A	0.782878	3.07739	5.94199e-10	2.60493e-09	No-Deg
FARS2	0.781868	3.81826	6.01464e-10	2.63436e-09	No-Deg
COMMD8	0.781807	3.43627	6.14666e-10	2.68809e-09	No-Deg
MRPL38	0.781741	5.52511	5.80412e-10	2.54682e-09	No-Deg
ACADS	0.781609	4.64517	5.93735e-10	2.60369e-09	No-Deg
PRADC1	0.781592	3.92372	6.07655e-10	2.65905e-09	No-Deg
PSMD6	0.781474	5.94788	5.85876e-10	2.57001e-09	No-Deg
PSMB10	0.780993	5.75562	6.0211e-10	2.63639e-09	No-Deg
TTC39C	0.780334	5.04937	6.2968e-10	2.75207e-09	No-Deg
CASP6	0.780266	4.65639	6.37073e-10	2.78099e-09	No-Deg
GGT6	0.780066	4.36143	6.48815e-10	2.82795e-09	No-Deg
GPX1	0.779841	7.63995	6.3244e-10	2.76245e-09	No-Deg
FAM72B	0.779788	1.90465	7.93668e-10	3.4178e-09	No-Deg
RPL13	0.779742	10.0838	6.33517e-10	2.76631e-09	No-Deg
NUDT18	0.779636	3.76996	6.778e-10	2.94802e-09	No-Deg
SDHAF4	0.779415	1.75723	8.29302e-10	3.56483e-09	No-Deg
FUZ	0.779206	3.96327	6.87846e-10	2.98899e-09	No-Deg
RPS21	0.779184	8.37746	6.5358e-10	2.84613e-09	No-Deg
NHP2	0.778847	6.29663	6.70809e-10	2.9185e-09	No-Deg
RPL23A	0.778772	7.80493	6.68739e-10	2.91037e-09	No-Deg
STX19	0.778739	0.633473	1.15605e-09	4.886e-09	No-Deg
WRAP53	0.778637	3.23569	7.34583e-10	3.1767e-09	No-Deg
ARL16	0.778512	4.51684	7.01029e-10	3.04056e-09	No-Deg
FAM47E	0.778468	2.79499	7.65445e-10	3.30121e-09	No-Deg
CYP4F8	0.778133	3.31783	7.50456e-10	3.24144e-09	No-Deg
SSR4	0.777886	7.61838	7.00994e-10	3.04056e-09	No-Deg
ZDHHC24	0.777826	4.25757	7.32066e-10	3.16677e-09	No-Deg
FAM3A	0.77777	5.1081	7.19766e-10	3.11921e-09	No-Deg
LLPH	0.777696	5.13175	7.223e-10	3.12735e-09	No-Deg
KLHDC1	0.777599	0.815137	1.14862e-09	4.85599e-09	No-Deg
GPR89A	0.777574	5.80163	7.20413e-10	3.12107e-09	No-Deg
ZNF285	0.777253	1.79917	9.21138e-10	3.9442e-09	No-Deg
ANKRD42	0.777235	3.98392	7.6213e-10	3.28988e-09	No-Deg
PAGR1	0.77706	6.21477	7.37299e-10	3.18557e-09	No-Deg
SPATA5L1	0.776632	3.02425	8.27418e-10	3.5578e-09	No-Deg
MORN1	0.776503	1.95033	9.3474e-10	3.99771e-09	No-Deg
MT2A	0.77626	7.01285	7.6514e-10	3.30089e-09	No-Deg
S100A4	0.77545	6.30536	8.0161e-10	3.44993e-09	No-Deg
NUTM2A-AS1	0.775288	2.39692	9.39141e-10	4.01295e-09	No-Deg
PRELID2	0.775225	1.43961	1.09588e-09	4.63852e-09	No-Deg
BRIX1	0.775221	5.69477	8.15886e-10	3.51032e-09	No-Deg
MS4A8	0.775159	0.630949	1.38925e-09	5.80829e-09	No-Deg
DPY19L2P4	0.775083	0.462097	1.49185e-09	6.21011e-09	No-Deg
ACAD11	0.775078	3.68245	8.63729e-10	3.70949e-09	No-Deg
PHLDA2	0.774963	2.71231	9.25568e-10	3.96085e-09	No-Deg
HOXC5	0.774845	1.19282	1.18424e-09	4.99484e-09	No-Deg
QPCTL	0.774435	3.55609	8.98556e-10	3.85099e-09	No-Deg
VGLL1	0.774352	0.193681	1.75401e-09	7.2447e-09	No-Deg
TM2D2	0.774115	6.03555	8.61473e-10	3.7009e-09	No-Deg
EXOC3L1	0.773501	1.39397	1.2095e-09	5.09537e-09	No-Deg
MEI1	0.77331	1.91	1.10955e-09	4.69361e-09	No-Deg
SYNE4	0.773177	4.33296	9.31224e-10	3.98386e-09	No-Deg
ANAPC13	0.772307	6.02858	9.4671e-10	4.04288e-09	No-Deg
TMEM186	0.772269	3.89454	9.90834e-10	4.22377e-09	No-Deg
KLHDC3	0.772118	6.50371	9.5263e-10	4.06695e-09	No-Deg
RASL10B	0.772051	1.74164	1.21706e-09	5.12273e-09	No-Deg
NDUFAF7	0.772038	3.17169	1.04028e-09	4.42274e-09	No-Deg
OMA1	0.771992	4.83646	9.78366e-10	4.17434e-09	No-Deg
DNAH2	0.771775	2.06309	1.17421e-09	4.95688e-09	No-Deg
HSD17B1	0.771738	3.27576	1.04976e-09	4.46038e-09	No-Deg
AGR2	0.771725	10.5479	9.63936e-10	4.114e-09	No-Deg
CLDN3	0.771571	6.66369	9.79181e-10	4.17658e-09	No-Deg
DNAJC25	0.771458	3.41136	1.05687e-09	4.48793e-09	No-Deg
PSRC1	0.771388	3.04743	1.08492e-09	4.59617e-09	No-Deg
PPP4C	0.771091	6.89492	1.00272e-09	4.27189e-09	No-Deg
TUBE1	0.770868	2.36622	1.18467e-09	4.99517e-09	No-Deg
PAQR7	0.770758	4.1967	1.06036e-09	4.50012e-09	No-Deg
EMC4	0.770207	6.06322	1.05566e-09	4.48413e-09	No-Deg
OGFOD2	0.769839	3.7781	1.12928e-09	4.77564e-09	No-Deg
BOLA1	0.76979	4.36096	1.10954e-09	4.69361e-09	No-Deg
CYP4F12	0.769641	0.532703	1.90859e-09	7.84479e-09	No-Deg
RTN4IP1	0.769588	2.93636	1.20045e-09	5.05873e-09	No-Deg
ARF5	0.769504	7.36946	1.0868e-09	4.60281e-09	No-Deg
PTDSS2	0.768743	4.62403	1.16348e-09	4.91447e-09	No-Deg
MAPK12	0.768631	2.39786	1.32473e-09	5.55148e-09	No-Deg
GTF2E2	0.768473	4.76383	1.17621e-09	4.96242e-09	No-Deg
BBOF1	0.768389	3.87068	1.21271e-09	5.10591e-09	No-Deg
ELMO3	0.76817	4.91813	1.19105e-09	5.0206e-09	No-Deg
PMPCB	0.768137	6.11428	1.17477e-09	4.9578e-09	No-Deg
SNX24	0.768095	3.56377	1.24795e-09	5.25008e-09	No-Deg
MACROD1	0.767762	3.96734	1.24805e-09	5.25008e-09	No-Deg
POMZP3	0.766958	3.31598	1.34074e-09	5.61531e-09	No-Deg
TCTN1	0.766899	5.23221	1.2652e-09	5.32067e-09	No-Deg
B3GAT3	0.766844	5.30247	1.26743e-09	5.32849e-09	No-Deg
BBOX1	0.766593	0.86749	1.97688e-09	8.11619e-09	No-Deg
WDR66	0.766552	1.70071	1.62462e-09	6.73739e-09	No-Deg
GLRX3	0.766445	5.36607	1.29267e-09	5.42504e-09	No-Deg
MRPL21	0.766238	4.921	1.31607e-09	5.5168e-09	No-Deg
C9orf16	0.766206	5.6805	1.3036e-09	5.46932e-09	No-Deg
MZF1	0.766051	3.89124	1.36712e-09	5.71912e-09	No-Deg
TMUB1	0.765947	5.25211	1.32856e-09	5.56593e-09	No-Deg
MXD3	0.765863	3.68669	1.39212e-09	5.81721e-09	No-Deg
MPC1	0.765808	4.4578	1.35953e-09	5.68901e-09	No-Deg
ACAA1	0.765462	5.93507	1.35111e-09	5.65708e-09	No-Deg
PIGB	0.765429	4.30463	1.39219e-09	5.81721e-09	No-Deg
THUMPD3-AS1	0.765252	3.23138	1.47115e-09	6.12573e-09	No-Deg
ASB9	0.765083	1.51558	1.81268e-09	7.47412e-09	No-Deg
MMAB	0.764994	4.6995	1.40962e-09	5.88491e-09	No-Deg
NPAS3	0.764744	1.15135	2.00265e-09	8.21729e-09	No-Deg
SMPDL3B	0.764654	3.9225	1.46728e-09	6.1114e-09	No-Deg
OXLD1	0.76463	4.78143	1.43373e-09	5.98111e-09	No-Deg
TFB1M	0.764283	3.68767	1.50993e-09	6.28175e-09	No-Deg
TMEM139	0.764199	3.10694	1.56511e-09	6.50002e-09	No-Deg
IL1B	0.763932	2.26078	1.71185e-09	7.08278e-09	No-Deg
TIMP1	0.763739	8.64523	1.45988e-09	6.08235e-09	No-Deg
COLQ	0.763417	1.31264	2.05985e-09	8.4399e-09	No-Deg
ZNF428	0.762811	5.26209	1.56107e-09	6.48512e-09	No-Deg
ST3GAL3	0.762631	3.27979	1.67788e-09	6.94623e-09	No-Deg
UBE2M	0.76257	5.65736	1.57248e-09	6.52682e-09	No-Deg
RPL29	0.762504	8.50101	1.55594e-09	6.46754e-09	No-Deg
CAPN9	0.761663	3.44304	1.74731e-09	7.22192e-09	No-Deg
1191	0.761565	9.51383	1.63097e-09	6.75984e-09	No-Deg
WEE2-AS1	0.761116	1.32887	2.30518e-09	9.38615e-09	No-Deg
CIB1	0.760931	6.96957	1.69404e-09	7.0111e-09	No-Deg
UTP11	0.760749	4.78763	1.74967e-09	7.22886e-09	No-Deg
MRPS22	0.760663	4.41605	1.77264e-09	7.31744e-09	No-Deg
SCN1B	0.760647	3.00963	1.8893e-09	7.77218e-09	No-Deg
C3orf18	0.760343	3.15874	1.89992e-09	7.81265e-09	No-Deg
283174	0.760277	2.23259	2.06905e-09	8.47519e-09	No-Deg
PRR19	0.760134	1.30994	2.4325e-09	9.88215e-09	No-Deg
CCDC125	0.760128	5.06251	1.79695e-09	7.41509e-09	No-Deg
FSIP1	0.760116	4.83644	1.80551e-09	7.44669e-09	No-Deg
MAT1A	0.760044	1.22317	2.49398e-09	1.01205e-08	No-Deg
MYDGF	0.759842	6.36201	1.79733e-09	7.41509e-09	No-Deg
MSANTD2	0.759349	2.80044	2.05048e-09	8.40634e-09	No-Deg
PRODH	0.75911	4.41018	1.91946e-09	7.88493e-09	No-Deg
FAHD2A	0.758448	3.63644	2.0397e-09	8.36451e-09	No-Deg
BCAS2	0.758191	5.69398	1.96693e-09	8.07763e-09	No-Deg
DDRGK1	0.757799	6.02058	2.0004e-09	8.21039e-09	No-Deg
5349	0.756953	7.41389	2.07256e-09	8.48473e-09	No-Deg
SFI1	0.756694	4.6626	2.15773e-09	8.82334e-09	No-Deg
ATP6V1B1	0.756209	4.63104	2.21317e-09	9.03973e-09	No-Deg
HSPBP1	0.756178	5.68929	2.17968e-09	8.90803e-09	No-Deg
TMEM80	0.756173	3.89669	2.26557e-09	9.23557e-09	No-Deg
SCNN1G	0.756119	2.95049	2.38831e-09	9.70537e-09	No-Deg
PRR29	0.756008	2.17386	2.58633e-09	1.04715e-08	No-Deg
TMEM92	0.755613	0.10133	4.65926e-09	1.83368e-08	No-Deg
ING4	0.755612	4.97924	2.26562e-09	9.23557e-09	No-Deg
ICA1L	0.755605	1.50571	2.93066e-09	1.17727e-08	No-Deg
IL20RB	0.755578	-0.105466	5.23427e-09	2.04874e-08	No-Deg
IGFLR1	0.755342	3.10141	2.45862e-09	9.98264e-09	No-Deg
ATXN7L2	0.755234	1.74922	2.85775e-09	1.15023e-08	No-Deg
POLR2K	0.754954	6.12342	2.31034e-09	9.40451e-09	No-Deg
CDK5RAP3	0.754776	6.65254	2.3231e-09	9.45111e-09	No-Deg
LINC-PINT	0.754733	2.11145	2.7798e-09	1.12074e-08	No-Deg
SREK1IP1	0.754685	5.35554	2.36109e-09	9.59747e-09	No-Deg
PAX2	0.754384	0.576438	4.01744e-09	1.58893e-08	No-Deg
NUDT7	0.754055	1.77829	3.0177e-09	1.20919e-08	No-Deg
SCG5	0.753632	2.48352	2.81732e-09	1.13491e-08	No-Deg
TIMM17B	0.753516	5.34432	2.50577e-09	1.01654e-08	No-Deg
TRAPPC2	0.753324	4.00507	2.60741e-09	1.0548e-08	No-Deg
GRM4	0.753062	3.02672	2.77262e-09	1.11911e-08	No-Deg
DAD1	0.752895	7.17032	2.54965e-09	1.03318e-08	No-Deg
IQCK	0.752776	4.76906	2.62652e-09	1.06223e-08	No-Deg
TCEAL3	0.752692	6.02323	2.59343e-09	1.04973e-08	No-Deg
SMIM20	0.752014	4.02697	2.78383e-09	1.12205e-08	No-Deg
PPP1R14B	0.751868	6.14082	2.70132e-09	1.09125e-08	No-Deg
ZNF358	0.751783	6.24556	2.71077e-09	1.09476e-08	No-Deg
LETM2	0.751649	1.91428	3.33395e-09	1.3307e-08	No-Deg
CREB3	0.751322	6.1189	2.77739e-09	1.12009e-08	No-Deg
PPP4R4	0.751	2.20849	3.31302e-09	1.32272e-08	No-Deg
ID1	0.750812	3.6667	2.99893e-09	1.20267e-08	No-Deg
TRNAU1AP	0.750804	3.9217	2.96996e-09	1.19205e-08	No-Deg
SIRT3	0.750643	5.24417	2.90169e-09	1.16661e-08	No-Deg
STC2	0.750564	8.9736	2.8576e-09	1.15023e-08	No-Deg
GNG11	0.750561	5.00902	2.92464e-09	1.17551e-08	No-Deg
ANKRD9	0.75051	2.10746	3.43776e-09	1.36833e-08	No-Deg
MED4	0.749921	5.53667	2.99798e-09	1.20263e-08	No-Deg
[truncated: 7,658 more rows]
