# Supplementary material for: Pan-cancer onco-signatures reveal a novel mitochondrial subtype of luminal breast cancer with specific regulators
Source: J Transl Med. 2023 Jan 30;21:55. doi: 10.1186/s12967-023-03907-z (PMC9885701; doi:10.1186/s12967-023-03907-z)
Supplement: Supplementary file 4 — Additional file 4: Table S3. List of Differentially Expressed miRNAs (DEmiRs): Cluster 4 vs Cluster 2. List of microRNAs exhibiting significant differential expression between Cluster 4 and Cluster 2. [file 12967_2023_3907_MOESM4_ESM.xlsx]

## Sheet: DEMIRsCluster4vsCluster2
miRNA-ID	logFC	logCPM	PValue	FDR	Expression status
hsa-miR-135a-5p	2.89731	3.4583	1.33e-102	3e-99	Up
hsa-miR-122-5p	2.48202	1.11926	1.28e-24	4.11e-22	Up
hsa-miR-153-3p	1.70833	2.58045	9.73e-30	5.47e-27	Up
hsa-miR-34c-5p	1.47805	3.87444	5.17e-26	1.94e-23	Up
hsa-miR-653-3p	1.44307	1.79565	6.1e-16	1.05e-13	Up
hsa-miR-135b-5p	1.41886	3.47104	4.93e-23	1.39e-20	Up
hsa-miR-887-5p	1.362	1.89482	4.7e-15	7.55e-13	Up
hsa-miR-4784	1.34643	1.45457	6.97e-11	5.23e-09	Up
hsa-miR-653-5p	1.32562	5.76963	1.1e-22	2.74e-20	Up
hsa-miR-489-3p	1.31949	1.6079	5.84e-12	5.25e-10	Up
hsa-miR-3065-3p	1.1316	5.72439	1.34e-16	2.74e-14	Up
hsa-miR-4461	1.11459	1.58856	1.93e-08	1e-06	Up
hsa-miR-34b-5p	1.11195	1.75144	2.08e-09	1.26e-07	Up
hsa-miR-135b-3p	1.02594	1.07472	0.000117574	0.00228054	Up
hsa-miR-7156-5p	1.02324	1.54235	5.3e-07	1.86e-05	Up
hsa-miR-451a	1.022	7.56144	6.17e-14	7.31e-12	Up
hsa-miR-129-1-3p	0.969656	1.05885	0.000550115	0.00819707	No-DemiR
hsa-miR-144-3p	0.967941	2.23367	6.07e-09	3.41e-07	No-DemiR
hsa-miR-338-3p	0.952318	8.29444	3.05e-12	2.99e-10	No-DemiR
hsa-miR-34c-3p	0.936646	2.72761	1.61e-09	1.03e-07	No-DemiR
hsa-miR-181d-5p	0.866146	4.47278	1.13e-09	7.48e-08	No-DemiR
hsa-miR-652-5p	0.843777	1.30612	0.000347232	0.00550192	No-DemiR
hsa-miR-96-5p	0.734183	5.21967	1.97e-07	8.52e-06	No-DemiR
hsa-miR-15a-5p	0.728597	7.21103	1.53e-07	6.9e-06	No-DemiR
hsa-miR-103a-3p	0.727851	14.3873	1.35e-07	6.21e-06	No-DemiR
hsa-miR-455-5p	0.720003	4.2721	6.14e-07	2.06e-05	No-DemiR
hsa-miR-29c-3p	0.715459	10.9882	2.27e-07	9.44e-06	No-DemiR
hsa-miR-508-3p	0.709102	3.51295	2.08e-06	5.76e-05	No-DemiR
hsa-miR-449a	0.704741	3.99149	1.38e-06	4.04e-05	No-DemiR
hsa-miR-181c-5p	0.701427	5.50115	6.35e-07	2.1e-05	No-DemiR
hsa-miR-181a-5p	0.691019	10.5882	6e-07	2.05e-05	No-DemiR
hsa-miR-200a-3p	0.672701	8.12861	1.29e-06	3.88e-05	No-DemiR
hsa-miR-153-5p	0.671394	5.18136	2.18e-06	5.98e-05	No-DemiR
hsa-miR-5683	0.663317	3.74239	7.39e-06	0.000186775	No-DemiR
hsa-miR-181b-5p	0.660709	8.43048	1.99e-06	5.63e-05	No-DemiR
hsa-miR-338-5p	0.657769	2.15549	0.000150922	0.00278184	No-DemiR
hsa-miR-144-5p	0.653287	5.64802	3.6e-06	9.65e-05	No-DemiR
hsa-miR-129-5p	0.640847	1.94563	0.000399277	0.00619568	No-DemiR
hsa-miR-30c-2-3p	0.63023	6.1371	7.29e-06	0.000186508	No-DemiR
hsa-miR-20a-5p	0.619724	7.3677	9.11e-06	0.000225313	No-DemiR
hsa-miR-128-3p	0.618953	7.01941	9.62e-06	0.000235366	No-DemiR
hsa-miR-200b-3p	0.609799	9.32178	1.19e-05	0.000284566	No-DemiR
hsa-miR-429	0.602855	6.88014	1.68e-05	0.000386154	No-DemiR
hsa-miR-2115-3p	0.598633	1.64312	0.00326447	0.037667	No-DemiR
hsa-miR-423-5p	0.598551	5.93979	2.2e-05	0.000499206	No-DemiR
hsa-miR-664a-3p	0.573603	5.42784	5.41e-05	0.00115905	No-DemiR
hsa-miR-362-3p	0.560972	1.74481	0.00419996	0.0454001	No-DemiR
hsa-miR-182-5p	0.557223	15.4636	6.48e-05	0.0013507	No-DemiR
hsa-miR-93-5p	0.556154	12.0262	6.72e-05	0.00138786	No-DemiR
hsa-miR-660-5p	0.542543	5.01403	0.000152841	0.00278184	No-DemiR
hsa-miR-34b-3p	0.540853	1.94863	0.00334762	0.0384293	No-DemiR
hsa-miR-375	0.528971	14.7779	0.00015331	0.00278184	No-DemiR
hsa-miR-29b-3p	0.503419	9.25943	0.000327168	0.00533427	No-DemiR
hsa-miR-744-5p	0.488153	4.54045	0.000778377	0.0109459	No-DemiR
hsa-miR-148a-5p	0.486274	5.26458	0.00068131	0.009764	No-DemiR
hsa-miR-200c-3p	0.482053	13.3609	0.000580799	0.00859736	No-DemiR
hsa-miR-340-5p	0.474391	4.23422	0.00122313	0.0160003	No-DemiR
hsa-miR-1180-3p	0.471457	3.96917	0.00146564	0.0189522	No-DemiR
hsa-miR-190b	0.468495	4.76589	0.00119883	0.0157741	No-DemiR
hsa-miR-17-3p	0.464614	7.17762	0.000986806	0.0136216	No-DemiR
hsa-miR-342-3p	0.460625	8.97296	0.00104369	0.0141465	No-DemiR
hsa-miR-141-3p	0.45966	10.0732	0.00105935	0.0142726	No-DemiR
hsa-miR-486-5p	0.452916	5.72982	0.00148614	0.0191075	No-DemiR
hsa-miR-30a-5p	0.444203	15.653	0.00155705	0.0198278	No-DemiR
hsa-miR-361-5p	0.425619	7.57115	0.00256595	0.0302271	No-DemiR
hsa-miR-23a-3p	-0.430582	11.5857	0.00459814	0.0485719	No-DemiR
hsa-miR-126-3p	-0.440457	11.6344	0.00376457	0.0417205	No-DemiR
hsa-miR-532-3p	-0.451107	4.5954	0.00421716	0.0454001	No-DemiR
hsa-miR-708-5p	-0.451793	5.72845	0.00346246	0.0392604	No-DemiR
hsa-miR-2355-5p	-0.451828	5.58453	0.00351605	0.0395556	No-DemiR
hsa-miR-155-5p	-0.458712	8.85004	0.00261812	0.030681	No-DemiR
hsa-miR-99a-5p	-0.464914	9.638	0.00227928	0.0274381	No-DemiR
hsa-miR-100-5p	-0.466964	11.6854	0.00216437	0.0263768	No-DemiR
hsa-miR-99b-3p	-0.468756	6.34162	0.00231031	0.0275037	No-DemiR
hsa-miR-424-5p	-0.473576	7.26733	0.00198272	0.0243777	No-DemiR
hsa-miR-382-5p	-0.478337	4.73146	0.00236831	0.0280458	No-DemiR
hsa-miR-493-5p	-0.478715	3.68261	0.00347236	0.0392604	No-DemiR
hsa-miR-331-3p	-0.4842	5.1469	0.0019242	0.0239196	No-DemiR
hsa-miR-940	-0.491213	3.08024	0.00435729	0.0464864	No-DemiR
hsa-let-7d-3p	-0.499223	8.14024	0.0011018	0.0146689	No-DemiR
hsa-miR-29b-1-5p	-0.511579	2.7663	0.00396755	0.0433349	No-DemiR
hsa-miR-582-3p	-0.511835	7.17378	0.000857635	0.0119856	No-DemiR
hsa-miR-744-3p	-0.512736	4.21215	0.00143741	0.0186946	No-DemiR
hsa-miR-642a-5p	-0.515781	2.71807	0.00404035	0.0439169	No-DemiR
hsa-miR-125b-5p	-0.518448	9.56647	0.000696565	0.00991944	No-DemiR
hsa-miR-146a-5p	-0.525203	7.08776	0.000634512	0.00915162	No-DemiR
hsa-miR-1247-5p	-0.530669	3.14604	0.00194579	0.0240551	No-DemiR
hsa-miR-187-3p	-0.535687	5.43071	0.000590932	0.00865757	No-DemiR
hsa-miR-576-5p	-0.539919	3.75004	0.0010139	0.0139102	No-DemiR
hsa-miR-3200-3p	-0.54362	2.51402	0.00326104	0.037667	No-DemiR
hsa-miR-192-5p	-0.544833	9.05478	0.0003769	0.00593025	No-DemiR
hsa-miR-942-5p	-0.553059	2.51358	0.00279456	0.0325791	No-DemiR
hsa-miR-514a-3p	-0.555919	2.33632	0.0038012	0.0417205	No-DemiR
hsa-miR-3653-5p	-0.556283	2.64934	0.00216876	0.0263768	No-DemiR
hsa-miR-328-3p	-0.560218	5.45159	0.000332585	0.00535762	No-DemiR
hsa-miR-409-3p	-0.56038	4.78334	0.000388781	0.00607471	No-DemiR
hsa-miR-145-5p	-0.56742	10.5075	0.000214509	0.00374144	No-DemiR
hsa-miR-301a-3p	-0.567552	3.84246	0.000548854	0.00819707	No-DemiR
hsa-miR-136-5p	-0.573229	5.1049	0.000263147	0.00438579	No-DemiR
hsa-miR-23b-3p	-0.577787	9.67324	0.000166792	0.00295497	No-DemiR
hsa-let-7g-3p	-0.577927	5.19212	0.000230178	0.00392061	No-DemiR
hsa-miR-550a-5p	-0.579027	2.36436	0.00229261	0.0274381	No-DemiR
hsa-miR-874-3p	-0.584751	5.02924	0.00020349	0.00357698	No-DemiR
hsa-miR-1306-5p	-0.586378	3.19842	0.000608294	0.00883007	No-DemiR
hsa-miR-154-5p	-0.59581	2.88596	0.000720017	0.0101889	No-DemiR
hsa-miR-99b-5p	-0.596571	15.3826	0.000101929	0.00202955	No-DemiR
hsa-miR-105-5p	-0.616068	4.34985	0.000130038	0.00242605	No-DemiR
hsa-miR-3928-3p	-0.617707	1.96027	0.00336608	0.0384451	No-DemiR
hsa-miR-20a-3p	-0.621582	3.17123	0.000295963	0.00486071	No-DemiR
hsa-miR-503-5p	-0.623332	4.15175	0.000125128	0.00236586	No-DemiR
hsa-miR-21-3p	-0.638699	11.4981	3.36e-05	0.000756789	No-DemiR
hsa-miR-130b-5p	-0.644217	3.67304	0.000111827	0.00218793	No-DemiR
hsa-miR-3130-5p	-0.647751	2.62294	0.000418106	0.00644342	No-DemiR
hsa-miR-370-3p	-0.648234	3.0011	0.000224597	0.00388726	No-DemiR
hsa-miR-23a-5p	-0.650854	2.25433	0.000867043	0.0120423	No-DemiR
hsa-miR-885-5p	-0.654717	1.94004	0.00229029	0.0274381	No-DemiR
hsa-miR-4668-3p	-0.659218	2.78069	0.00024767	0.00415864	No-DemiR
hsa-miR-4772-3p	-0.668471	2.63078	0.000270251	0.00447107	No-DemiR
hsa-miR-1306-3p	-0.675058	1.6724	0.00379574	0.0417205	No-DemiR
hsa-miR-337-3p	-0.679542	5.40033	1.59e-05	0.000373321	No-DemiR
hsa-miR-1269b	-0.68533	3.01618	9.13e-05	0.00183514	No-DemiR
hsa-miR-98-3p	-0.686656	1.87135	0.00155978	0.0198278	No-DemiR
hsa-let-7i-3p	-0.688873	6.35384	1.01e-05	0.000245232	No-DemiR
hsa-miR-191-3p	-0.690939	2.7724	0.000130468	0.00242605	No-DemiR
hsa-miR-3614-5p	-0.696108	2.57906	0.00016151	0.00289769	No-DemiR
hsa-miR-550a-3p	-0.698647	1.913	0.00108573	0.0145411	No-DemiR
hsa-miR-487a-5p	-0.704137	1.58578	0.00378941	0.0417205	No-DemiR
hsa-miR-181b-2-3p	-0.726836	2.04168	0.000500051	0.00760212	No-DemiR
hsa-miR-1247-3p	-0.731905	5.28959	3.77e-06	9.86e-05	No-DemiR
hsa-miR-891a-5p	-0.749112	1.88266	0.000525905	0.00794152	No-DemiR
hsa-miR-326	-0.754731	3.71094	6.57e-06	0.000169931	No-DemiR
hsa-miR-181b-3p	-0.75636	4.78791	2.28e-06	6.18e-05	No-DemiR
hsa-miR-31-5p	-0.764055	2.66772	3.48e-05	0.000775647	No-DemiR
hsa-miR-188-3p	-0.765189	1.58302	0.00178522	0.022566	No-DemiR
hsa-miR-9-3p	-0.776278	1.8177	0.000592563	0.00865757	No-DemiR
hsa-miR-130a-5p	-0.776508	1.55097	0.00188568	0.023571	No-DemiR
hsa-miR-589-3p	-0.779347	2.14435	0.000121649	0.00231958	No-DemiR
hsa-miR-516a-5p	-0.781148	1.43358	0.00437468	0.0464864	No-DemiR
hsa-miR-1271-5p	-0.783027	2.3669	5.47e-05	0.00116039	No-DemiR
hsa-miR-150-5p	-0.784818	10.0965	4.61e-07	1.65e-05	No-DemiR
hsa-miR-199a-3p	-0.794439	12.2663	3.34e-07	1.25e-05	No-DemiR
hsa-miR-199b-3p	-0.797794	12.2624	3e-07	1.19e-05	No-DemiR
hsa-miR-134-5p	-0.797811	8.85777	3.13e-07	1.2e-05	No-DemiR
hsa-miR-1258	-0.800891	1.74383	0.000429731	0.00657752	No-DemiR
hsa-miR-127-5p	-0.807685	8.38032	2.32e-07	9.51e-06	No-DemiR
hsa-miR-4772-5p	-0.813654	1.35197	0.00438006	0.0464864	No-DemiR
hsa-miR-675-3p	-0.814489	5.43471	2.95e-07	1.19e-05	No-DemiR
hsa-miR-4728-3p	-0.817708	2.52087	1.47e-05	0.00034707	No-DemiR
hsa-miR-3074-5p	-0.82272	4.05737	6.92e-07	2.26e-05	No-DemiR
hsa-miR-1229-3p	-0.835082	1.47396	0.00184777	0.0232261	No-DemiR
hsa-miR-146a-3p	-0.835612	1.52808	0.00118523	0.0156869	No-DemiR
hsa-miR-511-5p	-0.838109	3.23749	1.52e-06	4.4e-05	No-DemiR
hsa-miR-629-3p	-0.84259	3.07131	2e-06	5.63e-05	No-DemiR
hsa-miR-483-5p	-0.855949	2.29835	1.66e-05	0.000384421	No-DemiR
hsa-miR-452-3p	-0.860124	1.93042	6.84e-05	0.00139968	No-DemiR
hsa-miR-3677-5p	-0.863139	2.04382	3.78e-05	0.000834072	No-DemiR
hsa-miR-215-5p	-0.866877	3.13032	9.44e-07	2.99e-05	No-DemiR
hsa-miR-3653-3p	-0.870812	3.07279	9.57e-07	2.99e-05	No-DemiR
hsa-miR-518c-5p	-0.885649	1.23796	0.00354702	0.0397054	No-DemiR
hsa-miR-1-3p	-0.888574	3.07436	5.52e-07	1.91e-05	No-DemiR
hsa-miR-224-3p	-0.904456	1.71342	0.000119194	0.0022922	No-DemiR
hsa-miR-142-5p	-0.909658	6.55209	9.16e-09	5.02e-07	No-DemiR
hsa-miR-3607-5p	-0.924536	1.39114	0.0010287	0.0140277	No-DemiR
hsa-miR-3607-3p	-0.931624	6.68884	4.11e-09	2.37e-07	No-DemiR
hsa-miR-512-3p	-0.93226	1.58103	0.00016227	0.00289769	No-DemiR
hsa-miR-323b-3p	-0.939827	2.75269	3.81e-07	1.38e-05	No-DemiR
hsa-miR-323a-3p	-0.948139	2.49002	9.25e-07	2.97e-05	No-DemiR
hsa-miR-935	-0.989947	2.43298	3.58e-07	1.32e-05	No-DemiR
hsa-miR-1262	-0.997739	1.4435	0.000231752	0.00392061	No-DemiR
hsa-miR-509-3p	-1.01217	2.51008	1.59e-07	7.03e-06	Down
hsa-miR-2277-5p	-1.01452	1.52323	8.81e-05	0.0017862	Down
hsa-miR-4638-3p	-1.01911	1.81712	8.64e-06	0.000216089	Down
hsa-miR-26a-1-3p	-1.02544	2.82246	3.41e-08	1.67e-06	Down
hsa-miR-134-3p	-1.02662	1.93893	3.68e-06	9.73e-05	Down
hsa-miR-143-5p	-1.04246	6.15813	7.87e-11	5.71e-09	Down
hsa-miR-5698	-1.04377	1.56233	3.96e-05	0.000864982	Down
hsa-miR-196b-5p	-1.05067	8.30955	3.9e-11	3.13e-09	Down
hsa-miR-517a-3p	-1.05424	1.33222	0.000335744	0.00535762	Down
hsa-miR-517b-3p	-1.05424	1.33222	0.000335744	0.00535762	Down
hsa-miR-4724-5p	-1.05855	1.96999	1.31e-06	3.88e-05	Down
hsa-miR-3940-5p	-1.0637	1.39321	0.000227509	0.0039076	Down
hsa-miR-142-3p	-1.06403	11.5098	2.08e-11	1.73e-09	Down
hsa-miR-616-5p	-1.07866	2.17924	2.05e-07	8.7e-06	Down
hsa-miR-133a-3p	-1.08669	2.51273	2.18e-08	1.09e-06	Down
hsa-miR-539-5p	-1.09416	3.73377	2.31e-10	1.63e-08	Down
hsa-miR-937-3p	-1.10946	2.47667	1.7e-08	9.12e-07	Down
hsa-miR-301b-5p	-1.11467	1.39323	0.000103703	0.00204676	Down
hsa-miR-551b-3p	-1.11776	1.84484	1.22e-06	3.75e-05	Down
hsa-miR-628-5p	-1.13624	5.43009	2.81e-12	2.88e-10	Down
hsa-miR-3170	-1.14114	2.05514	1.07e-07	5.14e-06	Down
hsa-miR-150-3p	-1.21431	2.37673	1.75e-09	1.09e-07	Down
hsa-miR-3677-3p	-1.22058	3.93735	1.48e-12	1.58e-10	Down
hsa-miR-210-3p	-1.22506	9.3438	2.64e-14	3.49e-12	Down
hsa-miR-616-3p	-1.25177	1.58453	1.3e-06	3.88e-05	Down
hsa-let-7a-2-3p	-1.25185	3.13243	8.41e-12	7.28e-10	Down
hsa-miR-224-5p	-1.26731	4.59762	5.52e-14	6.9e-12	Down
hsa-let-7c-3p	-1.27893	5.0419	1.02e-14	1.44e-12	Down
hsa-miR-4714-5p	-1.28688	1.23962	4.35e-05	0.000941783	Down
hsa-miR-3605-3p	-1.29637	2.55911	5.81e-11	4.51e-09	Down
hsa-miR-503-3p	-1.349	2.1973	3.26e-10	2.22e-08	Down
hsa-miR-519a-5p	-1.35315	1.58133	3.14e-07	1.2e-05	Down
hsa-miR-3923	-1.37641	1.15689	6.26e-05	0.00131646	Down
hsa-miR-7702	-1.43281	1.8162	3.44e-09	2.04e-07	Down
hsa-miR-6718-5p	-1.48143	1.62512	1.96e-08	1e-06	Down
hsa-miR-301a-5p	-1.50327	3.33837	3.71e-16	6.96e-14	Down
hsa-miR-133b	-1.6153	1.33509	1.17e-07	5.48e-06	Down
hsa-miR-9-5p	-1.6181	10.5468	1.49e-22	3.34e-20	Down
hsa-miR-383-5p	-1.66547	1.90007	3.69e-12	3.46e-10	Down
hsa-miR-526b-5p	-1.68357	1.96594	1.23e-12	1.39e-10	Down
hsa-miR-1269a	-1.88558	5.08163	5.4e-27	2.43e-24	Down
hsa-miR-577	-1.93769	1.90691	9.6e-15	1.44e-12	Down
hsa-miR-483-3p	-2.4096	3.7171	7.56e-35	5.67e-32	Down
hsa-miR-206	-3.75405	2.17303	1.7e-38	1.91e-35	Down
