# Supplementary material for: Pan-cancer onco-signatures reveal a novel mitochondrial subtype of luminal breast cancer with specific regulators
Source: J Transl Med. 2023 Jan 30;21:55. doi: 10.1186/s12967-023-03907-z (PMC9885701; doi:10.1186/s12967-023-03907-z)
Supplement: Supplementary file 6 — Additional file 6: Table S4. List of transcription factor binding sites in both human MIR135A promoter elements. List of putative transcription factors binding sites significantly enriched in MIR135A1 and MIR135A2 promoter regions. [file 12967_2023_3907_MOESM6_ESM.xlsx]

## Sheet: TF binding sites list
	ConsensusString	N of consensus sequences occurring in MIR135A1 promoter	N of consensus sequences occurring in MIR135A2 promoter	TF
Hsapiens-jaspar2018-TFAP2A-MA0003.1	GCC????G?	8	0	TFAP2A
Hsapiens-jaspar2018-ELK1-MA0028.1	???CCGGAAG	1	0	ELK1
Hsapiens-jaspar2018-FOXC1-MA0032.1	?????GTA	11	5	FOXC1
Hsapiens-jaspar2018-FOXL1-MA0033.1	???A?ATA	1	3	FOXL1
Hsapiens-jaspar2018-GATA2-MA0036.1	?GAT?	10	19	GATA2
Hsapiens-jaspar2018-GATA3-MA0037.1	?GATAG	1	6	GATA3
Hsapiens-jaspar2018-MZF1-MA0056.1	?GGGGA	8	5	MZF1
Hsapiens-jaspar2018-MZF1(var.2)-MA0057.1	??AGGGGGAA	1	0	MZF1(var.2)
Hsapiens-jaspar2018-GABPA-MA0062.1	ACCGGAAG?G	1	0	GABPA
Hsapiens-jaspar2018-SPI1-MA0080.1	?GGAAG	12	5	SPI1
Hsapiens-jaspar2018-SPIB-MA0081.1	AG?GGAA	4	1	SPIB
Hsapiens-jaspar2018-YY1-MA0095.1	?CCAT?	5	3	YY1
Hsapiens-jaspar2018-ETS1-MA0098.1	?TTCC?	6	15	ETS1
Hsapiens-jaspar2018-ZNF354C-MA0130.1	?TCCAC	1	0	ZNF354C
Mmusculus;Rnorvegicus;Hsapiens-jaspar2018-NFATC2-MA0152.1	TTTTCCA	1	0	NFATC2
Rnorvegicus;Hsapiens-jaspar2018-FEV-MA0156.1	CAGGAAAT	1	1	FEV
Hsapiens-jaspar2018-NFIC-MA0161.1	TTGGC?	3	1	NFIC
Hsapiens-jaspar2018-NRF1-MA0506.1	GCGC?TGCGC?	1	0	NRF1
Hsapiens-jaspar2018-FLI1-MA0475.1	?CAGGAAGTGG	1	0	FLI1
Hsapiens-jaspar2018-TFAP2C-MA0524.1	????GCCCCAGGGC?	2	0	TFAP2C
Hsapiens-jaspar2018-USF2-MA0526.1	G?CATGTGAC?	1	0	USF2
Hsapiens-jaspar2018-GATA2-MA0036.2	???TTCTTATCT??	1	0	GATA2
Hsapiens-jaspar2018-THAP1-MA0597.1	?TGCCC??A	1	0	THAP1
Hsapiens-jaspar2018-ELF5-MA0136.2	A?CCGGAAGT?	1	0	ELF5
Hsapiens-jaspar2018-NFIA-MA0670.1	??TGCCAA??	2	0	NFIA
Hsapiens-jaspar2018-NFIX-MA0671.1	??TGCCAA?	11	0	NFIX
Hsapiens-jaspar2018-NKX2-8-MA0673.1	?CACTTGA?	1	0	NKX2
Hsapiens-jaspar2018-MEOX2-MA0706.1	?GTAATTA??	1	0	MEOX2
Hsapiens-jaspar2018-RHOXF1-MA0719.1	?T?ATCC?	5	2	RHOXF1
Hsapiens-jaspar2018-SNAI2-MA0745.1	??CAGGTG?	1	1	SNAI2
Hsapiens-jaspar2018-MEIS1-MA0498.2	?TGACA?	3	1	MEIS1
Hsapiens-jaspar2018-TBX5-MA0807.1	AGGTGTGA	1	0	TBX5
Hsapiens-jaspar2018-TEAD3-MA0808.1	ACATTCC?	1	0	TEAD3
Hsapiens-jaspar2018-TFAP2A-MA0003.3	?GCCTCAGGC?	1	0	TFAP2A
Hsapiens-jaspar2018-TFAP2B(var.2)-MA0812.1	?GCCT?AGGC?	1	0	TFAP2B(var.2)
Hsapiens-jaspar2018-TFAP2C(var.2)-MA0814.1	?GCCT?AGGC?	1	0	TFAP2C(var.2)
Hsapiens-jaspar2018-GATA2-MA0036.3	??CTTATCT??	1	0	GATA2
Hsapiens-jaspar2018-KLF4-MA0039.3	?CACACCCT??	2	0	KLF4
Hsapiens-jaspar2018-SOX13-MA1120.1	??ACAATGG??	1	0	SOX13
Hsapiens-jaspar2018-FOXC1-MA0032.1.1	?????GTA	11	5	FOXC1
Hsapiens-jaspar2018-FOXL1-MA0033.1.1	???A?ATA	1	3	FOXL1
Hsapiens-jaspar2018-GATA2-MA0036.1.1	?GAT?	10	19	GATA2
Hsapiens-jaspar2018-GATA3-MA0037.1.1	?GATAG	1	6	GATA3
Hsapiens-jaspar2018-FOXI1-MA0042.1	???TGTTTGTTT	0	1	FOXI1
Hsapiens-jaspar2018-MEF2A-MA0052.1	CTATTTATAG	0	1	MEF2A
Hsapiens-jaspar2018-MZF1-MA0056.1.1	?GGGGA	8	5	MZF1
Hsapiens-jaspar2018-SPI1-MA0080.1.1	?GGAAG	12	5	SPI1
Hsapiens-jaspar2018-SPIB-MA0081.1.1	AG?GGAA	4	1	SPIB
Hsapiens-jaspar2018-YY1-MA0095.1.1	?CCAT?	5	3	YY1
Hsapiens-jaspar2018-ETS1-MA0098.1.1	?TTCC?	6	15	ETS1
Rnorvegicus;Hsapiens-jaspar2018-FEV-MA0156.1.1	CAGGAAAT	1	1	FEV
Mmusculus;Hsapiens-jaspar2018-HOXA5-MA0158.1	C??TAATT	0	2	HOXA5
Hsapiens-jaspar2018-NFIC-MA0161.1.1	TTGGC?	3	1	NFIC
Mmusculus;Rnorvegicus;Hsapiens-jaspar2018-SOX10-MA0442.1	C?TTGT	0	3	SOX10
Hsapiens-jaspar2018-PRDM1-MA0508.1	?GAAAGTGAAAGT??	0	1	PRDM1
Hsapiens-jaspar2018-POU2F2-MA0507.1	???ATTTGCATAT	0	1	POU2F2
Hsapiens-jaspar2018-GATA3-MA0037.2	AGATAAGA	0	1	GATA3
Hsapiens-jaspar2018-HNF4A-MA0114.2	?TG?ACTTTG??C??	0	1	HNF4A
Hsapiens-jaspar2018-ZEB1-MA0103.2	?C?CACCTG	0	1	ZEB1
Hsapiens-jaspar2018-EHF-MA0598.1	CCTTCCTG	0	2	EHF
Hsapiens-jaspar2018-NFATC3-MA0625.1	??TTTCCA??	0	1	NFATC3
Hsapiens-jaspar2018-SHOX-MA0630.1	?TAATT??	0	2	SHOX
Hsapiens-jaspar2018-ALX3-MA0634.1	??TAATTA??	0	1	ALX3
Hsapiens-jaspar2018-EN1-MA0027.2	?TAATTA?	0	1	EN1
Hsapiens-jaspar2018-EN2-MA0642.1	??CAATTA??	0	1	EN2
Hsapiens-jaspar2018-ESX1-MA0644.1	???AATTA??	0	1	ESX1
Hsapiens-jaspar2018-ISX-MA0654.1	?TAATTA?	0	1	ISX
Hsapiens-jaspar2018-MEF2B-MA0660.1	?CTATAAATAGC	0	1	MEF2B
Hsapiens-jaspar2018-MIXL1-MA0662.1	???AATTA??	0	1	MIXL1
Hsapiens-jaspar2018-MSX1-MA0666.1	?CAATTA?	0	1	MSX1
Hsapiens-jaspar2018-NKX2-3-MA0672.1	?CCACTT?A?	0	1	NKX2
Hsapiens-jaspar2018-PAX4-MA0068.2	CTAATTAG	0	1	PAX4
Hsapiens-jaspar2018-LBX2-MA0699.1	??CAATTA??	0	1	LBX2
Hsapiens-jaspar2018-LHX2-MA0700.1	?CTAATTA??	0	1	LHX2
Hsapiens-jaspar2018-LHX9-MA0701.1	??AATTA?	0	1	LHX9
Hsapiens-jaspar2018-LMX1B-MA0703.1	?TAATTAA	0	1	LMX1B
Hsapiens-jaspar2018-MSX2-MA0708.1	?CAATTA?	0	1	MSX2
Hsapiens-jaspar2018-NKX3-2-MA0122.2	?CCACTTAA	0	1	NKX3
Hsapiens-jaspar2018-NOTO-MA0710.1	?CTAATTA??	0	1	NOTO
Hsapiens-jaspar2018-OTX1-MA0711.1	?TAATCC?	0	1	OTX1
Hsapiens-jaspar2018-OTX2-MA0712.1	?TAATCC?	0	1	OTX2
Hsapiens-jaspar2018-PDX1-MA0132.2	?TAATTA?	0	1	PDX1
Hsapiens-jaspar2018-PRRX1-MA0716.1	??AATTA?	0	1	PRRX1
Hsapiens-jaspar2018-RAX2-MA0717.1	??AATTA?	0	1	RAX2
Hsapiens-jaspar2018-RAX-MA0718.1	???AATTA??	0	1	RAX
Hsapiens-jaspar2018-RHOXF1-MA0719.1.1	?T?ATCC?	5	2	RHOXF1
Hsapiens-jaspar2018-UNCX-MA0721.1	??AATTA?	0	1	UNCX
Hsapiens-jaspar2018-VSX1-MA0725.1	CTAATTA?	0	1	VSX1
Hsapiens-jaspar2018-VSX2-MA0726.1	CTAATTA?	0	1	VSX2
Hsapiens-jaspar2018-SNAI2-MA0745.1.1	??CAGGTG?	1	1	SNAI2
Hsapiens-jaspar2018-GATA5-MA0766.1	?GATAA??	0	2	GATA5
Hsapiens-jaspar2018-MEF2D-MA0773.1	?CTATAAATAG?	0	1	MEF2D
Hsapiens-jaspar2018-MEIS1-MA0498.2.1	?TGACA?	3	1	MEIS1
Hsapiens-jaspar2018-MEIS2-MA0774.1	TTGACAG?	0	1	MEIS2
Hsapiens-jaspar2018-MEIS3-MA0775.1	?TGACAG?	0	1	MEIS3
Hsapiens-jaspar2018-FIGLA-MA0820.1	??CACCTG??	0	1	FIGLA
Hsapiens-jaspar2018-ID4-MA0824.1	??CACCTG??	0	1	ID4
Hsapiens-jaspar2018-TCF3-MA0522.2	??CACCTG??	0	1	TCF3
Hsapiens-jaspar2018-TCF4-MA0830.1	??CACCTG??	0	2	TCF4
Hsapiens-jaspar2018-BARX1-MA0875.1	?C?ATTA?	0	1	BARX1
Hsapiens-jaspar2018-BSX-MA0876.1	?C?ATTA?	0	1	BSX
Hsapiens-jaspar2018-CDX1-MA0878.1	GCAATAAAA	0	1	CDX1
Hsapiens-jaspar2018-DLX6-MA0882.1	?CAATTA?	0	1	DLX6
Hsapiens-jaspar2018-EMX2-MA0886.1	??TAATTA??	0	1	EMX2
Hsapiens-jaspar2018-GBX1-MA0889.1	?C?AATTA??	0	1	GBX1
Hsapiens-jaspar2018-GBX2-MA0890.1	??CAATTA??	0	1	GBX2
Hsapiens-jaspar2018-GSX1-MA0892.1	??TAATTA??	0	1	GSX1
Hsapiens-jaspar2018-GSX2-MA0893.1	???AATTA??	0	1	GSX2
Hsapiens-jaspar2018-HESX1-MA0894.1	??TAATTG??	0	2	HESX1
Hsapiens-jaspar2018-HOXA10-MA0899.1	?GTAATAAAA?	0	1	HOXA10
Hsapiens-jaspar2018-HOXA2-MA0900.1	??TAATTA??	0	1	HOXA2
Hsapiens-jaspar2018-HOXB2-MA0902.1	??TAATTA??	0	1	HOXB2
Hsapiens-jaspar2018-HOXB3-MA0903.1	??TAATTA??	0	1	HOXB3
Hsapiens-jaspar2018-ASCL1-MA1100.1	??AGCAGCTG???	0	1	ASCL1
Hsapiens-jaspar2018-SIX1-MA1118.1	G?AACCTGA??	0	1	SIX1
Hsapiens-jaspar2018-SOX10-MA0442.2	??AACAAAG??	0	1	SOX10
Hsapiens-jaspar2018-ZEB1-MA0103.3	??CACCTG???	0	2	ZEB1
Hsapiens-jaspar2018-ZNF384-MA1125.1	????AAAAAAAA	0	1	ZNF384
Hsapiens-jaspar2018-GATA3-MA0037.3	AGATAA??	0	1	GATA3
Hsapiens-jaspar2018-JUN::JUNB(var.2)-MA1133.1	??TGACGTCAT?	0	1	JUN::JUNB(var.2)
Hsapiens-jaspar2018-SOX15-MA1152.1	CTATTGTT??	0	2	SOX15
Hsapiens-jaspar2018-VDR-MA0693.2	?GAGTTCA	0	1	VDR
